# Supplementary material
Source: HighWire-hosted journal article supplement (https://dmd.aspetjournals.org/highwire/filestream/76940/field_highwire_adjunct_files/4/000227R2_SupplementalModelFile6_Formulation.xlsx)
Supplement: 000227R2_SupplementalModelFile6_Formulation.xlsx [file 000227R2_SupplementalModelFile6_Formulation.xlsx]

## Sheet: P
p	Name	Value	Unit	Fix/Opt	LB	UB	Description
p[0]	ini_t	0	min	Fix	0	0	start of simulation
p[1]	end_t	2880	min	Fix	0	0	end of simulation
p[2]	t_before	0	min	Fix	0	0	time before integration for AUC calculation
p[3]	once_a_day	1440	min	Fix	0	0	interval (once a day)
p[4]	one_time	1000000	min	Fix	0	0	interval (never again)
p[5]	no_lag_time	0	min	Fix	0	0	lag time (no lag from start)
p[6]	endless	5760	min	Fix	0	0	duration (endless)
p[7]	no_duration	1e-06	min	Fix	0	0	duration (instant)
p[8]	W_body	70	kg	Fix	0	0	body weight
p[9]	H_body	178	cm	Fix	0	0	body height
p[10]	T_body	310	K	Fix	0	0	body temperature =37+273
p[11]	tau_cb	0.014	min	Fix	0	0	interval of cardiovascular flow (heart beat)
p[12]	V_cb_in	78.4029	mL	Fix	0	0	Qco + Iw_exhale = 5600 + 0.21 = 5600.21 mL/min
p[13]	V_other_in	40.3037	mL	Fix	0	0	Qother = 2879 mL/min
p[14]	V_other_base	17800	mL	Fix	0	0	skin 7800 mL + adipose 10000 mL, actual value = 17840.3049
p[15]	Iw_exhale	0.21	mL/min	Fix	0	0	assumed to be 60% of Iw_skin. Insensible perspiration is 806 mL/day in total.
p[16]	Iw_skin	0.35	mL/min	Fix	0	0	0.3 mL/kg/h*70 kg / 60 = 0.35 mL/min (=504 mL/day) (Lamke et al, 1977)
p[17]	tau_hb	0.025	min	Fix	0	0	interval of hepatic blood flow
p[18]	V_hb_in	7.5	mL	Fix	0	0	volume of hepatic arterial flow every interval (Qhb,in = 300 mL/min)
p[19]	V_pv_out	28.75	mL	Fix	0	0	flowing volume from portal vein to hepatic inlet
p[20]	V_hi	275.5	mL	Fix	0	0	interstitial fluid volume in liver V_hi = 275.5
p[21]	V_hc	1220.18	mL	Fix	0	0	V_hc = 1220.18 mL
p[22]	fd_hb	0.15	-	Fix	0	0	fraction diffused of hepatic blood
p[23]	tau_bile	1	min	Fix	0	0	interval of bile flow
p[24]	lag_meal1	1380	min	Fix	0	0	schedule of breakfast
p[25]	lag_meal2	1680	min	Fix	0	0	schedule of lunch
p[26]	lag_meal3	2100	min	Fix	0	0	schedule of dinner
p[27]	V_meal	532.467	mL	Fix	0	0	water intake in meal =(2197.4-200*3)/3
p[28]	W_meal	9.4	g	Fix	0	0	non-digestible food (28.2 g/day)
p[29]	V_gbd_max	20	mL	Fix	0	0	maximum vo
p[30]	Iw_hbile	0.479	mL/min	Fix	0	0	infiltration rate of hepatic bile
p[31]	ff_gbd_empty_on	0.0267491	-	Fix	0	0	fraction of flowed volume in emptying phase
p[32]	V_gbd_empty_off	0.192063	mL	Fix	0	0	leak volume from gallbladder in refilling and full phase
p[33]	V_gbd_refill_on	0.399696	mL	Fix	0	0	refilling volume into gallbladder in refilling phase
p[34]	Iw_gbd_abs	0.0958	mL/min	Fix	0	0	infiltration rate of water absorption by gallbladder
p[35]	lag_gbd_emptying	7.5	min	Fix	0	0	lag time from meal to gallbladder emptying
p[36]	tau_rb	0.004	min	Fix	0	0	interval of renal blood flow
p[37]	tau_ru	0.076	min	Fix	0	0	interval of urinary flow
p[38]	V_rb_in	5	mL	Fix	0	0	renal blood flow (Qrb = 1250 mL/min)
p[39]	V_gfr	0.5	mL	Fix	0	0	glomelular filtration rate (1% of Qrb)
p[40]	V_rc1	9.61863	mL	Fix	0	0	V_rc = 65.76 mL, 4.9 mm / 33.5 mm
p[41]	V_rc2	15.5076	mL	Fix	0	0	7.9 mm / 33.5 mm
p[42]	V_rc3	15.5076	mL	Fix	0	0	7.9 mm / 33.5 mm
p[43]	V_rc4	9.61863	mL	Fix	0	0	4.9 mm / 33.5 mm
p[44]	V_rc5	15.5076	mL	Fix	0	0	7.9 mm / 33.5 mm
p[45]	kw_r_px	13.8134	/min	Fix	0	0	rate constant of water reabsorption
p[46]	kw_r_hd	0.885453	/min	Fix	0	0	rate constant of water reabsorption
p[47]	kw_r_ha	0.00753387	/min	Fix	0	0	rate constant of water reabsorption
p[48]	kw_r_ds	0.0132373	/min	Fix	0	0	rate constant of water reabsorption
p[49]	kw_r_cd	1.92036	/min	Fix	0	0	rate constant of water reabsorption
p[50]	Iw_if	100	mL/min	Fix	0	0
p[51]	V_if_base	2000	mL	Fix	0	0
p[52]	V_vein_base	3361.85	mL	Fix	0	0	base volume of vein
p[53]	tau_ge	1	min	Fix	0	0	interval of gastric emptying
p[54]	V_ge_max	12.5576	mL	Fix	0	0	gastric emptying volume
p[55]	Iw_stm	2.05644	mL/min	Fix	0	0	velocity of gastric acid secretion
p[56]	ff_stm	0.0835001	-	Fix	0	0	fraction stayed in stomach
p[57]	tau_gt_dji	6	min	Fix	0	0	interval of gut transit in jejunum and ileum
p[58]	tau_gt_asc	360	min	Fix	0	0	interval of gut transit in ascending colon
p[59]	tau_gt_tsc	360	min	Fix	0	0	interval of gut transit in transverse colon
p[60]	tau_gt_dsc	360	min	Fix	0	0	interval of gut transit in descending and sigmoid colon
p[61]	lag_gt_dsc	60	min	Fix	0	0	60 min after gut transit
p[62]	R_gas	0.00831	Pa・mL/(nmol・K)	Fix	0	0	gas constant
p[63]	pi_cop	3733.02	Pa	Fix	0	0	colloidal osmotic pressure (28 mmHg)
p[64]	P_cap	2266.47	Pa	Fix	0	0	blood pressure in intestinal capillary (17 mmHg)
p[65]	n_eff_min	144.91	nmol	Fix	0	0	effective minimum amount of solute in enteric fluid
p[66]	Rw_small	1791.09	Pa・min/mL	Fix	0	0	infiltration resistance in small intestine
p[67]	MWeff	0.0002	g/nmol	Fix	0	0	effective molecular weight of food
p[68]	fd_gt	0.05	-	Fix	0	0.2	fraction diffused of gut transit
p[69]	Iw_large	1	mL/min	Fix	0	0	infiltration rate in large intestine
p[70]	W_gr_epi	0.000652778	g	Fix	0	0	weight of epithelial cells peeled away
p[71]	V_gb_in	39.6	mL	Fix	0	0	Qgb = 1100 mL/min
p[72]	L_dji	20	cm	Fix	0	0	length of each section in duodenum, jejunum, and illeum (assumed stomach is equivalent to 20 cm)
p[73]	L_asc	15	cm	Fix	0	0	length of ascending colon
p[74]	L_tsc	25	cm	Fix	0	0	length of transverse colon
p[75]	L_dsc	60	cm	Fix	0	0	sum of length of descending and sigmoid colon
p[76]	L_rec	15	cm	Fix	0	0	length of rectum
p[77]	L_gtotal	780	cm	Fix	0	0	total length of gastro-intestinal truct
p[78]	V_gc	1455.3	mL	Fix	0	0	total volume of enterocyte
p[79]	S_dji	314.159	cm2	Fix	0	0	surface area of each section in dji (radius = 2.5cm, length=20cm) =2*PI()*2.5*20
p[80]	S_asc	376.991	cm2	Fix	0	0	surface area of ascending colon (radius = 4cm, length=15cm) =2*PI()*4*15
p[81]	S_tsc	628.319	cm2	Fix	0	0	surface area of transverse colon (radius = 4cm, length=50cm) =2*PI()*4*25
p[82]	S_dsc	1507.96	cm2	Fix	0	0	surface area of descending colon (radius = 4cm, length=60cm) =2*PI()*4*60
p[83]	S_rec	376.991	cm2	Fix	0	0	surface area of ascending colon (radius = 4cm, length=15cm) =2*PI()*4*15
p[84]	tau_gb	0.036	min	Fix	0	0	interval of gut blood flow
p[85]	V_spleenb	2.562	mL	Fix	0	0	volume of spleen blood flow every interval (Qspleenb = 71.167 mL/min)
p[86]	Iw_pv	11.5	mL/min	Fix	0	0	infiltration rate from portal vein to interstitial fluid (10% of Qpv)
p[87]	V_pv_base	82.8	mL	Fix	0	0	base volume of portal vein
p[88]	lag_urinate1	1350	min	Fix	0	0	lag time of urination
p[89]	lag_urinate2	300	min	Fix	0	0	lag time of urination
p[90]	lag_urinate3	480	min	Fix	0	0	lag time of urination
p[91]	lag_urinate4	720	min	Fix	0	0	lag time of urination
p[92]	lag_urinate5	900	min	Fix	0	0	lag time of urination
p[93]	lag_defecate	1350	min	Fix	0	0	lag time of defecation
p[94]	lag_drink1	1560	min	Fix	0	0	lag time of drinking
p[95]	lag_drink2	1860	min	Fix	0	0	lag time of drinking
p[96]	lag_drink3	840	min	Fix	0	0	lag time of drinking
p[97]	V_ubd_rem	25	mL	Fix	0	0	remaining volume after urination
p[98]	V_ubd_threshold	100	mL	Fix	0	0	threshold volume for urination
p[99]	V_drink	200	mL	Fix	0	0	volume of drinking water
p[100]	MW_msz	153.14	g/mol	Fix	0	0	molecular weight of mesalazine
p[101]	fu_b_msz	1	-	Fix	0	0	fraction of unbound drug in blood
p[102]	fu_h_msz	1	-	Fix	0	0	fraction of unbound drug in hepatocyte
p[103]	fu_e_msz	1	-	Fix	0	0	fraction of unbound drug in enterocyte
p[104]	fu_r_msz	1	-	Fix	0	0	fraction of unbound drug in renal cell
p[105]	Kp_msz	0.0153414	-	Opt	0.005	0.1	Kp = (Vd - Vb)/Vother =(18000-5200-)/(47800-Vhc-Vrc-Vgc)
p[106]	CLh_met_msz	219.487	mL/min	Opt	21.9487	2194.87
p[107]	PSh_sin_inf_msz	1.47032	mL/min	Opt	0.147032	14.7032
p[108]	PSh_sin_eff_msz	37.5936	mL/min	Opt	3.75936	375.936
p[109]	PSh_bile_eff_msz	0	mL/min	Fix	0	0
p[110]	PSru_inf_msz	0	mL/min	Fix	0	0
p[111]	PSru_eff_msz	0	mL/min	Fix	0	0
p[112]	PSrb_inf_msz	22.5071	mL/min	Opt	2.25071	225.071
p[113]	PSrb_eff_msz	0	mL/min	Fix	0	0
p[114]	CLg_met_msz	762.86	mL/min	Opt	76.286	7628.6	total metabolic clearance in gut
p[115]	Pgf_inf_msz	0.0533824	mL/min/cm2	Opt	0.00533824	0.533824	transmembrane permeability
p[116]	Pgf_eff_msz	0.000167481	mL/min/cm2	Opt	1.67481e-05	0.00167481	transmembrane permeability
p[117]	Pgb_inf_msz	0.00534657	mL/min/cm2	Opt	0.000534657	0.0534657	transmembrane permeability
p[118]	Pgb_eff_msz	0	mL/min/cm2	Fix	0	0	transmembrane permeability
p[119]	MW_met	195.17	g/mol	Fix	0	0	molecular weight of mesalazine
p[120]	fu_b_met	0.392	-	Fix	0	0	fraction of unbound drug in blood
p[121]	fu_h_met	1	-	Fix	0	0	fraction of unbound drug in hepatocyte
p[122]	fu_e_met	1	-	Fix	0	0	fraction of unbound drug in enterocyte
p[123]	fu_r_met	1	-	Fix	0	0	fraction of unbound drug in renal cell
p[124]	Kp_met	3.40712	-	Opt	0.1	3
p[125]	CLh_met_met	0	mL/min	Fix	0	0
p[126]	PSh_sin_inf_met	1108.75	mL/min	Opt	110.875	11087.5
p[127]	PSh_sin_eff_met	0.661773	mL/min	Opt	0.0661773	6.61773
p[128]	PSh_bile_eff_met	0	mL/min	Fix	0	0
p[129]	PSru_inf_met	0	mL/min	Fix	0	0
p[130]	PSru_eff_met	0	mL/min	Fix	0	0
p[131]	PSrb_inf_met	536.023	mL/min	Opt	53.6023	5360.23
p[132]	PSrb_eff_met	0	mL/min	Fix	0	0
p[133]	CLg_met_met	0	mL/min	Fix	0	0	total metabolic clearance in gut
p[134]	Pgf_inf_met	0.0686516	mL/min/cm2	Opt	0.00686516	0.686516	transmembrane permeability
p[135]	Pgf_eff_met	0.0126312	mL/min/cm2	Opt	0.00126312	0.126312	transmembrane permeability
p[136]	Pgb_inf_met	0.00592871	mL/min/cm2	Opt	0.000592871	0.0592871	transmembrane permeability
p[137]	Pgb_eff_met	0	mL/min/cm2	Fix	0	0	transmembrane permeability
p[138]	ka_fece	0.00536403	min-1	Opt	0.000536403	0.0536403	rate constant of fecal absorption
p[139]	k_disint_capsule	0	min-1	Fix	0	0
p[140]	k_disint_max	1	min-1	Fix	0	0
p[141]	alpha_disint	1	-	Fix	0	0
p[142]	t50_disint	9.90585	min	Opt	0	15
p[143]	k_dissol_a_pentasa	0.000153924	min-1	Opt	1.53924e-05	0.00153924
p[144]	k_dissol_n_pentasa	0.000827108	min-1	Opt	8.27108e-05	0.00827108
p[145]	k_dissol_n_apriso	0	min-1	Fix	0	0
p[146]	k_dissol_max_apriso	0.00136995	min-1	Opt	0.000136995	0.0136995
p[147]	alpha_dissol_apriso	0.1	-	Fix	0.01	1
p[148]	t50_dissol_apriso	133.611	min	Opt	100	200
p[149]	k_release_n_lialda	0	min-1	Fix	0	0
p[150]	k_release_max	0.00105958	min-1	Opt	0.000105958	0.0105958
p[151]	alpha_release_on	0.00430283	-	Opt	0.000430283	0.0430283
p[152]	t50_release_on	758.232	min	Opt	12	800
p[153]	alpha_release_off	0.1	-	Fix	0	0
p[154]	t50_release_off	1144.47	min	Opt	1000	1400
p[155]	t0_k_release	12	min	Fix	0	0
p[156]	lag_sol_dose	0	min	Fix	0	0
p[157]	lag_sol_snack	240	min	Fix	0	0
p[158]	lag_sol_meal	600	min	Fix	0	0
p[159]	lag_form_dose	0	min	Fix	0	0
p[160]	lag_form_snack	420	min	Fix	0	0
p[161]	lag_form_meal	600	min	Fix	0	0
p[162]	X_po_solution	652997	nmol	Fix	0	0	p.o. = 100 mg/125 mL (solution) =100*10^6/153.14
p[163]	X_po_pentasa	6.52997e+06	nmol	Fix	0	0	p.o. = 1000 mg/125 mL (pentasa) =1000*10^6/153.14
p[164]	X_po_apriso	7.34622e+06	nmol	Fix	0	0	p.o. = 1125 mg/125 mL (apriso) =1125*10^6/153.14
p[165]	X_po_lialda	7.83597e+06	nmol	Fix	0	0	p.o. = 1200 mg/125 mL (lialda) =1200*10^6/153.14
p[166]	V_water_solution	245	mL	Fix	0	0
p[167]	V_water_form	240	mL	Fix	0	0
p[168]	lag_print	60	min	Fix	0	0
p[169]	tau_clock	60	min	Fix	0	0
p[170]	start_clock	8	:00 am	Fix	0	0
p[171]	dur_meal1	1000	min	Fix	0	0

## Sheet: Y
y	Name	y0	Unit	ODE	Description
y[0]	t_meal_1	10740	min		#1 Solution
y[1]	phase_gbd_1	2	-
y[2]	V_vein_1	3292.6	mL	dydt[2] = Iw_gbd_abs - Iw_if*(V_vein_1/V_vein_base - 1)
y[3]	V_rheart_1	78.4029	mL
y[4]	V_pb1_1	78.4028	mL	dydt[4:8] = -Iw_exhale/4
y[5]	V_pb2_1	78.4021	mL
y[6]	V_pb3_1	78.4014	mL
y[7]	V_pb4_1	78.4006	mL
y[8]	V_lheart_1	78.4	mL
y[9]	V_artery_1	994.296	mL
y[10]	V_other_1	17840.3	mL	dydt[10] = -Iw_skin
y[11]	V_if_1	1544.14	mL	dydt[11] = Iw_pv*(V_pv_1/V_pv_base - 1) + Iw_if*(V_vein_1/V_vein_base - 1)
y[12]	V_pv_1	79.1423	mL	dydt[12] = -Iw_pv*(V_pv_1/V_pv_base - 1)
y[13]	V_hb_inlet_1	36.25	mL
y[14]	V_fhb1_1	36.2476	mL	dydt[14:19] = -Iw_hbile/5
y[15]	V_fhb2_1	36.2452	mL
y[16]	V_fhb3_1	36.2428	mL
y[17]	V_fhb4_1	36.2404	mL
y[18]	V_fhb5_1	36.238	mL
y[19]	V_hb_outlet_1	36.238	mL
y[20]	V_hduct_1	0.479	mL	dydt[20] = Iw_hbile
y[21]	V_gbd_1	20.0031	mL	dydt[21] = -Iw_gbd_abs
y[22]	V_bduct_1	0.3832	mL
y[23]	V_gbd_empty_1	0.192063	mL
y[24]	V_gbd_refill_1	0.287863	mL
y[25]	V_rb_glm_1	5	mL
y[26]	V_rb1_1	4.69996	mL	dydt[26] = kw_r_px*V_ru1_1
y[27]	V_rb2_1	4.75958	mL	dydt[27] = np.sum(kw_r_hd*y[33:38])
y[28]	V_rb3_1	4.77215	mL	dydt[28] = np.sum(kw_r_ha*y[38:45])
y[29]	V_rb4_1	4.78541	mL	dydt[29] = np.sum(kw_r_ds*y[45:49])
y[30]	V_rb5_1	4.9092	mL	dydt[30] = np.sum(kw_r_cd*(V_if_base/V_if_1)**2.5*y[49:71])
y[31]	V_ru0_1	9	mL
y[32]	V_ru1_1	3.52963	mL	dydt[32] = -kw_r_px*V_ru1_1
y[33]	V_ru2_1	3.13468	mL	dydt[33:38] = -kw_r_hd*y[33:38]
y[34]	V_ru3_1	2.93102	mL	dydt[38:45] = -kw_r_ha*y[38:45]
y[35]	V_ru4_1	2.73985	mL	dydt[45:49] = -kw_r_ds*y[45:49]
y[36]	V_ru5_1	2.56144	mL	dydt[49:71] = -kw_r_cd*(V_if_base/V_if_1)**2.5*y[49:71]
y[37]	V_ru6_1	2.39534	mL
y[38]	V_ru7_1	2.38567	mL
y[39]	V_ru8_1	2.3839	mL
y[40]	V_ru9_1	2.38244	mL
y[41]	V_ru10_1	2.38149	mL
y[42]	V_ru11_1	2.3799	mL
y[43]	V_ru12_1	2.37844	mL
y[44]	V_ru13_1	2.37699	mL
y[45]	V_ru14_1	2.37506	mL
y[46]	V_ru15_1	2.37245	mL
y[47]	V_ru16_1	2.37029	mL
y[48]	V_ru17_1	2.36768	mL
y[49]	V_ru18_1	1.81879	mL
y[50]	V_ru19_1	1.37712	mL
y[51]	V_ru20_1	1.04254	mL
y[52]	V_ru21_1	0.789361	mL
y[53]	V_ru22_1	0.597666	mL
y[54]	V_ru23_1	0.452524	mL
y[55]	V_ru24_1	0.342677	mL
y[56]	V_ru25_1	0.259448	mL
y[57]	V_ru26_1	0.196448	mL
y[58]	V_ru27_1	0.148763	mL
y[59]	V_ru28_1	0.112667	mL
y[60]	V_ru29_1	0.0852935	mL
y[61]	V_ru30_1	0.0645904	mL
y[62]	V_ru31_1	0.0489284	mL
y[63]	V_ru32_1	0.0370483	mL
y[64]	V_ru33_1	0.0280568	mL
y[65]	V_ru34_1	0.0212494	mL
y[66]	V_ru35_1	0.016095	mL
y[67]	V_ru36_1	0.0121888	mL
y[68]	V_ru37_1	0.00923187	mL
y[69]	V_ru38_1	0.00699216	mL
y[70]	V_ru39_1	0.00529584	mL
y[71]	V_ubd_1	33.2122	mL
y[72]	V_urinated_1	0	mL
y[73]	V_gb_ma_1	39.6	mL
y[74]	V_gb1_1	0.941353	mL	dydt[74] = -Iw_stm
y[75]	V_gb2_1	1.01538	mL
y[76]	V_gb3_1	1.04408	mL	dydt[76:106] = (pi_cop - P_cap - (n_eff_min+y[150:180]/MWeff)*(R_gas*T_body)/y[113:143])/Rw_small
y[77]	V_gb4_1	1.04332	mL
y[78]	V_gb5_1	1.03286	mL
y[79]	V_gb6_1	1.01538	mL
y[80]	V_gb7_1	1.01538	mL
y[81]	V_gb8_1	1.01538	mL
y[82]	V_gb9_1	1.01538	mL
y[83]	V_gb10_1	1.01538	mL
y[84]	V_gb11_1	1.01538	mL
y[85]	V_gb12_1	1.01538	mL
y[86]	V_gb13_1	1.01538	mL
y[87]	V_gb14_1	1.01538	mL
y[88]	V_gb15_1	1.01538	mL
y[89]	V_gb16_1	1.01538	mL
y[90]	V_gb17_1	1.01538	mL
y[91]	V_gb18_1	1.01538	mL
y[92]	V_gb19_1	1.01538	mL
y[93]	V_gb20_1	1.01538	mL
y[94]	V_gb21_1	1.01538	mL
y[95]	V_gb22_1	1.01538	mL
y[96]	V_gb23_1	1.01538	mL
y[97]	V_gb24_1	1.01538	mL
y[98]	V_gb25_1	1.01538	mL
y[99]	V_gb26_1	1.01538	mL
y[100]	V_gb27_1	1.01538	mL
y[101]	V_gb28_1	1.01538	mL
y[102]	V_gb29_1	1.01538	mL
y[103]	V_gb30_1	1.01538	mL
y[104]	V_gb31_1	1.01538	mL
y[105]	V_gb32_1	1.01538	mL
y[106]	V_gb33_1	0.763227	mL	dydt[106] = Iw_large * (V_gf33_1/(V_gf33_1+W_gr33_1)/0.75 - 1) if W_gr33_1 > 0 else 0
y[107]	V_gb34_1	1.2701	mL	dydt[107] = Iw_large * (V_gf34_1/(V_gf34_1+W_gr34_1)/0.75 - 1) if W_gr34_1 > 0 else 0
y[108]	V_gb35_1	1.26934	mL	dydt[108] = Iw_large * (V_gf35_1/(V_gf35_1+W_gr35_1)/0.75 - 1) if W_gr35_1 > 0 else 0
y[109]	V_gb36_1	3.04615	mL	dydt[109] = Iw_large * (V_gf36_1/(V_gf36_1+W_gr36_1)/0.75 - 1) if W_gr36_1 > 0 else 0
y[110]	V_gb37_1	0.761538	mL	dydt[110] = Iw_large * (V_gf37_1/(V_gf37_1+W_gr37_1)/0.75 - 1) if W_gr37_1 > 0 else 0
y[111]	V_gf1_1	24.6279	mL	dydt[111] = Iw_stm
y[112]	V_gf2_1	15.4082	mL
y[113]	V_gf3_1	9.53772	mL	dydt[113:143] = -(pi_cop - P_cap - (n_eff_min+y[150:180]/MWeff)*(R_gas*T_body)/y[113:143])/Rw_small
y[114]	V_gf4_1	4.86462	mL
y[115]	V_gf5_1	0.63152	mL
y[116]	V_gf6_1	0.266298	mL
y[117]	V_gf7_1	0.272032	mL
y[118]	V_gf8_1	0.277765	mL
y[119]	V_gf9_1	0.283499	mL
y[120]	V_gf10_1	0.289232	mL
y[121]	V_gf11_1	0.294965	mL
y[122]	V_gf12_1	0.300698	mL
y[123]	V_gf13_1	0.306432	mL
y[124]	V_gf14_1	0.312165	mL
y[125]	V_gf15_1	0.317898	mL
y[126]	V_gf16_1	0.323632	mL
y[127]	V_gf17_1	0.329365	mL
y[128]	V_gf18_1	0.335098	mL
y[129]	V_gf19_1	0.340831	mL
y[130]	V_gf20_1	0.346565	mL
y[131]	V_gf21_1	0.352298	mL
y[132]	V_gf22_1	0.358031	mL
y[133]	V_gf23_1	0.363765	mL
y[134]	V_gf24_1	0.369498	mL
y[135]	V_gf25_1	0.375231	mL
y[136]	V_gf26_1	0.380964	mL
y[137]	V_gf27_1	0.386698	mL
y[138]	V_gf28_1	0.392431	mL
y[139]	V_gf29_1	0.398164	mL
y[140]	V_gf30_1	0.403898	mL
y[141]	V_gf31_1	0.409631	mL
y[142]	V_gf32_1	0.415364	mL
y[143]	V_gf33_1	5.84363	mL	dydt[143] = -Iw_large * (V_gf33_1/(V_gf33_1+W_gr33_1)/0.75 - 1) if W_gr33_1 > 0 else 0
y[144]	V_gf34_1	49.1307	mL	dydt[144] = -Iw_large * (V_gf34_1/(V_gf34_1+W_gr34_1)/0.75 - 1) if W_gr34_1 > 0 else 0
y[145]	V_gf35_1	45.0314	mL	dydt[145] = -Iw_large * (V_gf35_1/(V_gf35_1+W_gr35_1)/0.75 - 1) if W_gr35_1 > 0 else 0
y[146]	V_gf36_1	0.449843	mL	dydt[146] = -Iw_large * (V_gf36_1/(V_gf36_1+W_gr36_1)/0.75 - 1) if W_gr36_1 > 0 else 0
y[147]	V_gf37_1	1.38319	mL	dydt[147] = -Iw_large * (V_gf37_1/(V_gf37_1+W_gr37_1)/0.75 - 1) if W_gr37_1 > 0 else 0
y[148]	V_gf_def_1	0	mL
y[149]	W_gr1_1	2.07314e-28	g
y[150]	W_gr2_1	1.55627e-28	g
y[151]	W_gr3_1	2.58115e-28	g
y[152]	W_gr4_1	0.000687135	g
y[153]	W_gr5_1	0.0013381	g
y[154]	W_gr6_1	0.00199098	g
y[155]	W_gr7_1	0.00264375	g
y[156]	W_gr8_1	0.00329653	g
y[157]	W_gr9_1	0.00394931	g
y[158]	W_gr10_1	0.00460208	g
y[159]	W_gr11_1	0.00525486	g
y[160]	W_gr12_1	0.00590764	g
y[161]	W_gr13_1	0.00656042	g
y[162]	W_gr14_1	0.00721319	g
y[163]	W_gr15_1	0.00786597	g
y[164]	W_gr16_1	0.00851875	g
y[165]	W_gr17_1	0.00917153	g
y[166]	W_gr18_1	0.00982431	g
y[167]	W_gr19_1	0.0104771	g
y[168]	W_gr20_1	0.0111299	g
y[169]	W_gr21_1	0.0117826	g
y[170]	W_gr22_1	0.0124354	g
y[171]	W_gr23_1	0.0130882	g
y[172]	W_gr24_1	0.013741	g
y[173]	W_gr25_1	0.0143938	g
y[174]	W_gr26_1	0.0150465	g
y[175]	W_gr27_1	0.0156993	g
y[176]	W_gr28_1	0.0163521	g
y[177]	W_gr29_1	0.0170049	g
y[178]	W_gr30_1	0.0176576	g
y[179]	W_gr31_1	0.0183104	g
y[180]	W_gr32_1	0.0189632	g
y[181]	W_gr33_1	1.59908	g
y[182]	W_gr34_1	14.8262	g
y[183]	W_gr35_1	14.8262	g
y[184]	W_gr36_1	0	g
y[185]	W_gr37_1	0	g
y[186]	W_gr_def_1	0	g
y[187]	V_total_1	0	mL
y[188]	X_vein_1	0	nmol
y[189]	X_rheart_1	0	nmol
y[190]	X_pb1_1	0	nmol
y[191]	X_pb2_1	0	nmol
y[192]	X_pb3_1	0	nmol
y[193]	X_pb4_1	0	nmol
y[194]	X_lheart_1	0	nmol
y[195]	X_artery_1	0	nmol
y[196]	X_other_1	0	nmol
y[197]	X_if_1	0	nmol
y[198]	X_pv_1	0	nmol
y[199]	X_hb_inlet_1	0	nmol
y[200]	X_fhb1_1	0	nmol	dydt[200:205] = -fu_b_msz*PSh_sin_inf_msz/5*y[200:205]/(y[14:19]+V_hi/5) + fu_h_msz*PSh_sin_eff_msz/5*y[335:340]/(V_hc/5)
y[201]	X_fhb2_1	0	nmol
y[202]	X_fhb3_1	0	nmol
y[203]	X_fhb4_1	0	nmol
y[204]	X_fhb5_1	0	nmol
y[205]	X_hb_outlet_1	0	nmol
y[206]	X_hduct_1	0	nmol	dydt[206] = np.sum(fu_h_msz*PSh_bile_eff_msz/5*y[335:340]/(V_hc/5))
y[207]	X_gbd_1	0	nmol
y[208]	X_bduct_1	0	nmol
y[209]	X_gbd_empty_1	0	nmol
y[210]	X_gbd_refill_1	0	nmol
y[211]	X_rb_glm_1	0	nmol
y[212]	X_rb1_1	0	nmol	dydt[212] = -fu_b_msz*PSrb_inf_msz/5*X_rb1_1/V_rb1_1 + fu_r_msz*PSrb_eff_msz/5*X_rc1_1/V_rc1
y[213]	X_rb2_1	0	nmol	dydt[213] = -fu_b_msz*PSrb_inf_msz/5*X_rb2_1/V_rb2_1 + fu_r_msz*PSrb_eff_msz/5*X_rc2_1/V_rc2
y[214]	X_rb3_1	0	nmol	dydt[214] = -fu_b_msz*PSrb_inf_msz/5*X_rb3_1/V_rb3_1 + fu_r_msz*PSrb_eff_msz/5*X_rc3_1/V_rc3
y[215]	X_rb4_1	0	nmol	dydt[215] = -fu_b_msz*PSrb_inf_msz/5*X_rb4_1/V_rb4_1 + fu_r_msz*PSrb_eff_msz/5*X_rc4_1/V_rc4
y[216]	X_rb5_1	0	nmol	dydt[216] = -fu_b_msz*PSrb_inf_msz/5*X_rb5_1/V_rb5_1 + fu_r_msz*PSrb_eff_msz/5*X_rc5_1/V_rc5
y[217]	X_ru0_1	0	nmol
y[218]	X_ru1_1	0	nmol	dydt[218] = -PSru_inf_msz/5*X_ru1_1/V_ru1_1 + fu_r_msz*PSru_eff_msz/5*X_rc1_1/V_rc1
y[219]	X_ru2_1	0	nmol	dydt[219:224] = (-PSru_inf_msz/5*y[219:224]/y[33:38] + fu_r_msz*PSru_eff_msz/5*X_rc2_1/V_rc2)*y[33:38]/np.sum(y[33:38])
y[220]	X_ru3_1	0	nmol	dydt[224:231] = (-PSru_inf_msz/5*y[224:231]/y[38:45] + fu_r_msz*PSru_eff_msz/5*X_rc3_1/V_rc3)*y[38:45]/np.sum(y[38:45])
y[221]	X_ru4_1	0	nmol	dydt[231:235] = (-PSru_inf_msz/5*y[231:235]/y[45:49] + fu_r_msz*PSru_eff_msz/5*X_rc4_1/V_rc4)*y[45:49]/np.sum(y[45:49])
y[222]	X_ru5_1	0	nmol	dydt[235:257] = (-PSru_inf_msz/5*y[235:257]/y[49:71] + fu_r_msz*PSru_eff_msz/5*X_rc5_1/V_rc5)*y[49:71]/np.sum(y[49:71])
y[223]	X_ru6_1	0	nmol
y[224]	X_ru7_1	0	nmol
y[225]	X_ru8_1	0	nmol
y[226]	X_ru9_1	0	nmol
y[227]	X_ru10_1	0	nmol
y[228]	X_ru11_1	0	nmol
y[229]	X_ru12_1	0	nmol
y[230]	X_ru13_1	0	nmol
y[231]	X_ru14_1	0	nmol
y[232]	X_ru15_1	0	nmol
y[233]	X_ru16_1	0	nmol
y[234]	X_ru17_1	0	nmol
y[235]	X_ru18_1	0	nmol
y[236]	X_ru19_1	0	nmol
y[237]	X_ru20_1	0	nmol
y[238]	X_ru21_1	0	nmol
y[239]	X_ru22_1	0	nmol
y[240]	X_ru23_1	0	nmol
y[241]	X_ru24_1	0	nmol
y[242]	X_ru25_1	0	nmol
y[243]	X_ru26_1	0	nmol
y[244]	X_ru27_1	0	nmol
y[245]	X_ru28_1	0	nmol
y[246]	X_ru29_1	0	nmol
y[247]	X_ru30_1	0	nmol
y[248]	X_ru31_1	0	nmol
y[249]	X_ru32_1	0	nmol
y[250]	X_ru33_1	0	nmol
y[251]	X_ru34_1	0	nmol
y[252]	X_ru35_1	0	nmol
y[253]	X_ru36_1	0	nmol
y[254]	X_ru37_1	0	nmol
y[255]	X_ru38_1	0	nmol
y[256]	X_ru39_1	0	nmol
y[257]	X_ubd_1	0	nmol
y[258]	X_urinated_1	0	nmol
y[259]	X_gb_ma_1	0	nmol
y[260]	X_gb1_1	0	nmol
y[261]	X_gb2_1	0	nmol	dydt[261:292] = fu_e_msz*Pgb_eff_msz*S_dji*y[346:377]/(L_dji/L_gtotal*V_gc) - fu_b_msz*Pgb_inf_msz*S_dji*y[261:292]/y[75:106]
y[262]	X_gb3_1	0	nmol	dydt[292] = fu_e_msz*Pgb_eff_msz*S_asc*X_gc33_1/(L_asc/L_gtotal*V_gc) - fu_b_msz*Pgb_inf_msz*S_asc*X_gb33_1/V_gb33_1
y[263]	X_gb4_1	0	nmol	dydt[293] = fu_e_msz*Pgb_eff_msz*S_tsc*X_gc34_1/(L_tsc/L_gtotal*V_gc) - fu_b_msz*Pgb_inf_msz*S_tsc*X_gb34_1/V_gb34_1
y[264]	X_gb5_1	0	nmol	dydt[294] = fu_e_msz*Pgb_eff_msz*S_tsc*X_gc35_1/(L_tsc/L_gtotal*V_gc) - fu_b_msz*Pgb_inf_msz*S_tsc*X_gb35_1/V_gb35_1
y[265]	X_gb6_1	0	nmol	dydt[295] = fu_e_msz*Pgb_eff_msz*S_dsc*X_gc36_1/(L_dsc/L_gtotal*V_gc) - fu_b_msz*Pgb_inf_msz*S_dsc*X_gb36_1/V_gb36_1
y[266]	X_gb7_1	0	nmol	dydt[296] = fu_e_msz*Pgb_eff_msz*S_rec*X_gc37_1/(L_rec/L_gtotal*V_gc) - fu_b_msz*Pgb_inf_msz*S_rec*X_gb37_1/V_gb37_1
y[267]	X_gb8_1	0	nmol
y[268]	X_gb9_1	0	nmol
y[269]	X_gb10_1	0	nmol
y[270]	X_gb11_1	0	nmol
y[271]	X_gb12_1	0	nmol
y[272]	X_gb13_1	0	nmol
y[273]	X_gb14_1	0	nmol
y[274]	X_gb15_1	0	nmol
y[275]	X_gb16_1	0	nmol
y[276]	X_gb17_1	0	nmol
y[277]	X_gb18_1	0	nmol
y[278]	X_gb19_1	0	nmol
y[279]	X_gb20_1	0	nmol
y[280]	X_gb21_1	0	nmol
y[281]	X_gb22_1	0	nmol
y[282]	X_gb23_1	0	nmol
y[283]	X_gb24_1	0	nmol
y[284]	X_gb25_1	0	nmol
y[285]	X_gb26_1	0	nmol
y[286]	X_gb27_1	0	nmol
y[287]	X_gb28_1	0	nmol
y[288]	X_gb29_1	0	nmol
y[289]	X_gb30_1	0	nmol
y[290]	X_gb31_1	0	nmol
y[291]	X_gb32_1	0	nmol
y[292]	X_gb33_1	0	nmol
y[293]	X_gb34_1	0	nmol
y[294]	X_gb35_1	0	nmol
y[295]	X_gb36_1	0	nmol
y[296]	X_gb37_1	0	nmol
y[297]	X_gf1_1	0	nmol
y[298]	X_gf2_1	0	nmol	dydt[298:329] = fu_e_msz*Pgf_eff_msz*S_dji*y[346:377]/(L_dji/L_gtotal*V_gc) - y[112:143]/(y[112:143]+y[150:181])*Pgf_inf_msz*S_dji*y[298:329]/y[112:143]
y[299]	X_gf3_1	0	nmol	dydt[329] = fu_e_msz*Pgf_eff_msz*S_asc*X_gc33_1/(L_asc/L_gtotal*V_gc) - V_gf33_1/(V_gf33_1+W_gr33_1)*Pgf_inf_msz*S_asc*X_gf33_1/V_gf33_1
y[300]	X_gf4_1	0	nmol	dydt[330] = fu_e_msz*Pgf_eff_msz*S_tsc*X_gc34_1/(L_tsc/L_gtotal*V_gc) - V_gf34_1/(V_gf34_1+W_gr34_1)*Pgf_inf_msz*S_tsc*X_gf34_1/V_gf34_1 - ka_fece*X_gf34_1
y[301]	X_gf5_1	0	nmol	dydt[331] = fu_e_msz*Pgf_eff_msz*S_tsc*X_gc35_1/(L_tsc/L_gtotal*V_gc) - V_gf35_1/(V_gf35_1+W_gr35_1)*Pgf_inf_msz*S_tsc*X_gf35_1/V_gf35_1 - ka_fece*X_gf35_1
y[302]	X_gf6_1	0	nmol	dydt[332] = fu_e_msz*Pgf_eff_msz*S_dsc*X_gc36_1/(L_dsc/L_gtotal*V_gc) - V_gf36_1/(V_gf36_1+W_gr36_1)*Pgf_inf_msz*S_dsc*X_gf36_1/V_gf36_1 - ka_fece*X_gf36_1
y[303]	X_gf7_1	0	nmol	dydt[333] = fu_e_msz*Pgf_eff_msz*S_rec*X_gc37_1/(L_rec/L_gtotal*V_gc) - V_gf37_1/(V_gf37_1+W_gr37_1)*Pgf_inf_msz*S_rec*X_gf37_1/V_gf37_1 - ka_fece*X_gf37_1
y[304]	X_gf8_1	0	nmol
y[305]	X_gf9_1	0	nmol
y[306]	X_gf10_1	0	nmol
y[307]	X_gf11_1	0	nmol
y[308]	X_gf12_1	0	nmol
y[309]	X_gf13_1	0	nmol
y[310]	X_gf14_1	0	nmol
y[311]	X_gf15_1	0	nmol
y[312]	X_gf16_1	0	nmol
y[313]	X_gf17_1	0	nmol
y[314]	X_gf18_1	0	nmol
y[315]	X_gf19_1	0	nmol
y[316]	X_gf20_1	0	nmol
y[317]	X_gf21_1	0	nmol
y[318]	X_gf22_1	0	nmol
y[319]	X_gf23_1	0	nmol
y[320]	X_gf24_1	0	nmol
y[321]	X_gf25_1	0	nmol
y[322]	X_gf26_1	0	nmol
y[323]	X_gf27_1	0	nmol
y[324]	X_gf28_1	0	nmol
y[325]	X_gf29_1	0	nmol
y[326]	X_gf30_1	0	nmol
y[327]	X_gf31_1	0	nmol
y[328]	X_gf32_1	0	nmol
y[329]	X_gf33_1	0	nmol
y[330]	X_gf34_1	0	nmol
y[331]	X_gf35_1	0	nmol
y[332]	X_gf36_1	0	nmol
y[333]	X_gf37_1	0	nmol
y[334]	X_gf_def_1	0	nmol
y[335]	X_hc1_1	0	nmol	dydt[335:340] = fu_b_msz*PSh_sin_inf_msz/5*y[200:205]/(y[14:19]+V_hi/5) - fu_h_msz*PSh_sin_eff_msz/5*y[335:340]/(V_hc/5) - fu_h_msz*PSh_bile_eff_msz/5*y[335:340]/(V_hc/5) - fu_h_msz*CLh_met_msz/5*y[335:340]/(V_hc/5)
y[336]	X_hc2_1	0	nmol
y[337]	X_hc3_1	0	nmol
y[338]	X_hc4_1	0	nmol
y[339]	X_hc5_1	0	nmol
y[340]	X_rc1_1	0	nmol	dydt[340] = fu_b_msz*PSrb_inf_msz/5*X_rb1_1/V_rb1_1 - fu_r_msz*PSrb_eff_msz/5*X_rc1_1/V_rc1 + PSru_inf_msz/5*X_ru1_1/V_ru1_1 - fu_r_msz*PSru_eff_msz/5*X_rc1_1/V_rc1
y[341]	X_rc2_1	0	nmol	dydt[341] = fu_b_msz*PSrb_inf_msz/5*X_rb2_1/V_rb2_1 - fu_r_msz*PSrb_eff_msz/5*X_rc2_1/V_rc2 + np.sum(PSru_inf_msz/5*y[33:38]/np.sum(y[33:38])*y[219:224]/y[33:38]) - fu_r_msz*PSru_eff_msz/5*X_rc2_1/V_rc2
y[342]	X_rc3_1	0	nmol	dydt[342] = fu_b_msz*PSrb_inf_msz/5*X_rb3_1/V_rb3_1 - fu_r_msz*PSrb_eff_msz/5*X_rc3_1/V_rc3 + np.sum(PSru_inf_msz/5*y[38:45]/np.sum(y[38:45])*y[224:231]/y[38:45]) - fu_r_msz*PSru_eff_msz/5*X_rc3_1/V_rc3
y[343]	X_rc4_1	0	nmol	dydt[343] = fu_b_msz*PSrb_inf_msz/5*X_rb4_1/V_rb4_1 - fu_r_msz*PSrb_eff_msz/5*X_rc4_1/V_rc4 + np.sum(PSru_inf_msz/5*y[45:49]/np.sum(y[45:49])*y[231:235]/y[45:49]) - fu_r_msz*PSru_eff_msz/5*X_rc4_1/V_rc4
y[344]	X_rc5_1	0	nmol	dydt[344] = fu_b_msz*PSrb_inf_msz/5*X_rb5_1/V_rb5_1 - fu_r_msz*PSrb_eff_msz/5*X_rc5_1/V_rc5 + np.sum(PSru_inf_msz/5*y[49:71]/np.sum(y[49:71])*y[235:257]/y[49:71]) - fu_r_msz*PSru_eff_msz/5*X_rc5_1/V_rc5
y[345]	X_gc1_1	0	nmol
y[346]	X_gc2_1	0	nmol	dydt[346:377] = -fu_e_msz*Pgb_eff_msz*S_dji*y[346:377]/(L_dji/L_gtotal*V_gc) + fu_b_msz*Pgb_inf_msz*S_dji*y[261:292]/y[75:106] - fu_e_msz*Pgf_eff_msz*S_dji*y[346:377]/(L_dji/L_gtotal*V_gc) + y[112:143]/(y[112:143]+y[150:181])*Pgf_inf_msz*S_dji*y[298:329]/y[112:143] - fu_e_msz*CLg_met_msz*y[346:377]/V_gc
y[347]	X_gc3_1	0	nmol	dydt[377] = -fu_e_msz*Pgb_eff_msz*S_asc*X_gc33_1/(L_asc/L_gtotal*V_gc) + fu_b_msz*Pgb_inf_msz*S_asc*X_gb33_1/V_gb33_1 - fu_e_msz*Pgf_eff_msz*S_asc*X_gc33_1/(L_asc/L_gtotal*V_gc) + V_gf33_1/(V_gf33_1+W_gr33_1)*Pgf_inf_msz*S_asc*X_gf33_1/V_gf33_1 - fu_e_msz*CLg_met_msz*X_gc33_1/V_gc
y[348]	X_gc4_1	0	nmol	dydt[378] = -fu_e_msz*Pgb_eff_msz*S_tsc*X_gc34_1/(L_tsc/L_gtotal*V_gc) + fu_b_msz*Pgb_inf_msz*S_tsc*X_gb34_1/V_gb34_1 - fu_e_msz*Pgf_eff_msz*S_tsc*X_gc34_1/(L_tsc/L_gtotal*V_gc) + V_gf34_1/(V_gf34_1+W_gr34_1)*Pgf_inf_msz*S_tsc*X_gf34_1/V_gf34_1 - fu_e_msz*CLg_met_msz*X_gc34_1/V_gc
y[349]	X_gc5_1	0	nmol	dydt[379] = -fu_e_msz*Pgb_eff_msz*S_tsc*X_gc35_1/(L_tsc/L_gtotal*V_gc) + fu_b_msz*Pgb_inf_msz*S_tsc*X_gb35_1/V_gb35_1 - fu_e_msz*Pgf_eff_msz*S_tsc*X_gc35_1/(L_tsc/L_gtotal*V_gc) + V_gf35_1/(V_gf35_1+W_gr35_1)*Pgf_inf_msz*S_tsc*X_gf35_1/V_gf35_1 - fu_e_msz*CLg_met_msz*X_gc35_1/V_gc
y[350]	X_gc6_1	0	nmol	dydt[380] = -fu_e_msz*Pgb_eff_msz*S_dsc*X_gc36_1/(L_dsc/L_gtotal*V_gc) + fu_b_msz*Pgb_inf_msz*S_dsc*X_gb36_1/V_gb36_1 - fu_e_msz*Pgf_eff_msz*S_dsc*X_gc36_1/(L_dsc/L_gtotal*V_gc) + V_gf36_1/(V_gf36_1+W_gr36_1)*Pgf_inf_msz*S_dsc*X_gf36_1/V_gf36_1 - fu_e_msz*CLg_met_msz*X_gc36_1/V_gc
y[351]	X_gc7_1	0	nmol	dydt[381] = -fu_e_msz*Pgb_eff_msz*S_rec*X_gc37_1/(L_rec/L_gtotal*V_gc) + fu_b_msz*Pgb_inf_msz*S_rec*X_gb37_1/V_gb37_1 - fu_e_msz*Pgf_eff_msz*S_rec*X_gc37_1/(L_rec/L_gtotal*V_gc) + V_gf37_1/(V_gf37_1+W_gr37_1)*Pgf_inf_msz*S_rec*X_gf37_1/V_gf37_1 - fu_e_msz*CLg_met_msz*X_gc37_1/V_gc
y[352]	X_gc8_1	0	nmol
y[353]	X_gc9_1	0	nmol
y[354]	X_gc10_1	0	nmol
y[355]	X_gc11_1	0	nmol
y[356]	X_gc12_1	0	nmol
y[357]	X_gc13_1	0	nmol
y[358]	X_gc14_1	0	nmol
y[359]	X_gc15_1	0	nmol
y[360]	X_gc16_1	0	nmol
y[361]	X_gc17_1	0	nmol
y[362]	X_gc18_1	0	nmol
y[363]	X_gc19_1	0	nmol
y[364]	X_gc20_1	0	nmol
y[365]	X_gc21_1	0	nmol
y[366]	X_gc22_1	0	nmol
y[367]	X_gc23_1	0	nmol
y[368]	X_gc24_1	0	nmol
y[369]	X_gc25_1	0	nmol
y[370]	X_gc26_1	0	nmol
y[371]	X_gc27_1	0	nmol
y[372]	X_gc28_1	0	nmol
y[373]	X_gc29_1	0	nmol
y[374]	X_gc30_1	0	nmol
y[375]	X_gc31_1	0	nmol
y[376]	X_gc32_1	0	nmol
y[377]	X_gc33_1	0	nmol
y[378]	X_gc34_1	0	nmol
y[379]	X_gc35_1	0	nmol
y[380]	X_gc36_1	0	nmol
y[381]	X_gc37_1	0	nmol
y[382]	X_gp1_1	0	nmol
y[383]	X_gp2_1	0	nmol
y[384]	X_gp3_1	0	nmol
y[385]	X_gp4_1	0	nmol
y[386]	X_gp5_1	0	nmol
y[387]	X_gp6_1	0	nmol
y[388]	X_gp7_1	0	nmol
y[389]	X_gp8_1	0	nmol
y[390]	X_gp9_1	0	nmol
y[391]	X_gp10_1	0	nmol
y[392]	X_gp11_1	0	nmol
y[393]	X_gp12_1	0	nmol
y[394]	X_gp13_1	0	nmol
y[395]	X_gp14_1	0	nmol
y[396]	X_gp15_1	0	nmol
y[397]	X_gp16_1	0	nmol
y[398]	X_gp17_1	0	nmol
y[399]	X_gp18_1	0	nmol
y[400]	X_gp19_1	0	nmol
y[401]	X_gp20_1	0	nmol
y[402]	X_gp21_1	0	nmol
y[403]	X_gp22_1	0	nmol
y[404]	X_gp23_1	0	nmol
y[405]	X_gp24_1	0	nmol
y[406]	X_gp25_1	0	nmol
y[407]	X_gp26_1	0	nmol
y[408]	X_gp27_1	0	nmol
y[409]	X_gp28_1	0	nmol
y[410]	X_gp29_1	0	nmol
y[411]	X_gp30_1	0	nmol
y[412]	X_gp31_1	0	nmol
y[413]	X_gp32_1	0	nmol
y[414]	X_gp33_1	0	nmol
y[415]	X_gp34_1	0	nmol
y[416]	X_gp35_1	0	nmol
y[417]	X_gp36_1	0	nmol
y[418]	X_gp37_1	0	nmol
y[419]	X_gp_def_1	0	nmol
y[420]	X_gs1_1	0	nmol
y[421]	X_gs2_1	0	nmol
y[422]	X_gs3_1	0	nmol
y[423]	X_gs4_1	0	nmol
y[424]	X_gs5_1	0	nmol
y[425]	X_gs6_1	0	nmol
y[426]	X_gs7_1	0	nmol
y[427]	X_gs8_1	0	nmol
y[428]	X_gs9_1	0	nmol
y[429]	X_gs10_1	0	nmol
y[430]	X_gs11_1	0	nmol
y[431]	X_gs12_1	0	nmol
y[432]	X_gs13_1	0	nmol
y[433]	X_gs14_1	0	nmol
y[434]	X_gs15_1	0	nmol
y[435]	X_gs16_1	0	nmol
y[436]	X_gs17_1	0	nmol
y[437]	X_gs18_1	0	nmol
y[438]	X_gs19_1	0	nmol
y[439]	X_gs20_1	0	nmol
y[440]	X_gs21_1	0	nmol
y[441]	X_gs22_1	0	nmol
y[442]	X_gs23_1	0	nmol
y[443]	X_gs24_1	0	nmol
y[444]	X_gs25_1	0	nmol
y[445]	X_gs26_1	0	nmol
y[446]	X_gs27_1	0	nmol
y[447]	X_gs28_1	0	nmol
y[448]	X_gs29_1	0	nmol
y[449]	X_gs30_1	0	nmol
y[450]	X_gs31_1	0	nmol
y[451]	X_gs32_1	0	nmol
y[452]	X_gs33_1	0	nmol
y[453]	X_gs34_1	0	nmol
y[454]	X_gs35_1	0	nmol
y[455]	X_gs36_1	0	nmol
y[456]	X_gs37_1	0	nmol
y[457]	X_gs_def_1	0	nmol
y[458]	X_total_1	0	nmol
y[459]	X_vein_1m	0	nmol
y[460]	X_rheart_1m	0	nmol
y[461]	X_pb1_1m	0	nmol
y[462]	X_pb2_1m	0	nmol
y[463]	X_pb3_1m	0	nmol
y[464]	X_pb4_1m	0	nmol
y[465]	X_lheart_1m	0	nmol
y[466]	X_artery_1m	0	nmol
y[467]	X_other_1m	0	nmol
y[468]	X_if_1m	0	nmol
y[469]	X_pv_1m	0	nmol
y[470]	X_hb_inlet_1m	0	nmol
y[471]	X_fhb1_1m	0	nmol	dydt[471:476] = -fu_b_met*PSh_sin_inf_met/5*y[471:476]/(y[14:19]+V_hi/5) + fu_h_met*PSh_sin_eff_met/5*y[606:611]/(V_hc/5)
y[472]	X_fhb2_1m	0	nmol
y[473]	X_fhb3_1m	0	nmol
y[474]	X_fhb4_1m	0	nmol
y[475]	X_fhb5_1m	0	nmol
y[476]	X_hb_outlet_1m	0	nmol
y[477]	X_hduct_1m	0	nmol	dydt[477] = np.sum(fu_h_met*PSh_bile_eff_met/5*y[606:611]/(V_hc/5))
y[478]	X_gbd_1m	0	nmol
y[479]	X_bduct_1m	0	nmol
y[480]	X_gbd_empty_1m	0	nmol
y[481]	X_gbd_refill_1m	0	nmol
y[482]	X_rb_glm_1m	0	nmol
y[483]	X_rb1_1m	0	nmol	dydt[483] = -fu_b_met*PSrb_inf_met/5*X_rb1_1m/V_rb1_1 + fu_r_met*PSrb_eff_met/5*X_rc1_1m/V_rc1
y[484]	X_rb2_1m	0	nmol	dydt[484] = -fu_b_met*PSrb_inf_met/5*X_rb2_1m/V_rb2_1 + fu_r_met*PSrb_eff_met/5*X_rc2_1m/V_rc2
y[485]	X_rb3_1m	0	nmol	dydt[485] = -fu_b_met*PSrb_inf_met/5*X_rb3_1m/V_rb3_1 + fu_r_met*PSrb_eff_met/5*X_rc3_1m/V_rc3
y[486]	X_rb4_1m	0	nmol	dydt[486] = -fu_b_met*PSrb_inf_met/5*X_rb4_1m/V_rb4_1 + fu_r_met*PSrb_eff_met/5*X_rc4_1m/V_rc4
y[487]	X_rb5_1m	0	nmol	dydt[487] = -fu_b_met*PSrb_inf_met/5*X_rb5_1m/V_rb5_1 + fu_r_met*PSrb_eff_met/5*X_rc5_1m/V_rc5
y[488]	X_ru0_1m	0	nmol
y[489]	X_ru1_1m	0	nmol	dydt[489] = -PSru_inf_met/5*X_ru1_1m/V_ru1_1 + fu_r_met*PSru_eff_met/5*X_rc1_1m/V_rc1
y[490]	X_ru2_1m	0	nmol	dydt[490:495] = (-PSru_inf_met/5*y[490:495]/y[33:38] + fu_r_met*PSru_eff_met/5*X_rc2_1m/V_rc2)*y[33:38]/np.sum(y[33:38])
y[491]	X_ru3_1m	0	nmol	dydt[495:502] = (-PSru_inf_met/5*y[495:502]/y[38:45] + fu_r_met*PSru_eff_met/5*X_rc3_1m/V_rc3)*y[38:45]/np.sum(y[38:45])
y[492]	X_ru4_1m	0	nmol	dydt[502:506] = (-PSru_inf_met/5*y[502:506]/y[45:49] + fu_r_met*PSru_eff_met/5*X_rc4_1m/V_rc4)*y[45:49]/np.sum(y[45:49])
y[493]	X_ru5_1m	0	nmol	dydt[506:528] = (-PSru_inf_met/5*y[506:528]/y[49:71] + fu_r_met*PSru_eff_met/5*X_rc5_1m/V_rc5)*y[49:71]/np.sum(y[49:71])
y[494]	X_ru6_1m	0	nmol
y[495]	X_ru7_1m	0	nmol
y[496]	X_ru8_1m	0	nmol
y[497]	X_ru9_1m	0	nmol
y[498]	X_ru10_1m	0	nmol
y[499]	X_ru11_1m	0	nmol
y[500]	X_ru12_1m	0	nmol
y[501]	X_ru13_1m	0	nmol
y[502]	X_ru14_1m	0	nmol
y[503]	X_ru15_1m	0	nmol
y[504]	X_ru16_1m	0	nmol
y[505]	X_ru17_1m	0	nmol
y[506]	X_ru18_1m	0	nmol
y[507]	X_ru19_1m	0	nmol
y[508]	X_ru20_1m	0	nmol
y[509]	X_ru21_1m	0	nmol
y[510]	X_ru22_1m	0	nmol
y[511]	X_ru23_1m	0	nmol
y[512]	X_ru24_1m	0	nmol
y[513]	X_ru25_1m	0	nmol
y[514]	X_ru26_1m	0	nmol
y[515]	X_ru27_1m	0	nmol
y[516]	X_ru28_1m	0	nmol
y[517]	X_ru29_1m	0	nmol
y[518]	X_ru30_1m	0	nmol
y[519]	X_ru31_1m	0	nmol
y[520]	X_ru32_1m	0	nmol
y[521]	X_ru33_1m	0	nmol
y[522]	X_ru34_1m	0	nmol
y[523]	X_ru35_1m	0	nmol
y[524]	X_ru36_1m	0	nmol
y[525]	X_ru37_1m	0	nmol
y[526]	X_ru38_1m	0	nmol
y[527]	X_ru39_1m	0	nmol
y[528]	X_ubd_1m	0	nmol
y[529]	X_urinated_1m	0	nmol
y[530]	X_gb_ma_1m	0	nmol
y[531]	X_gb1_1m	0	nmol
y[532]	X_gb2_1m	0	nmol	dydt[532:563] = fu_e_met*Pgb_eff_met*S_dji*y[617:648]/(L_dji/L_gtotal*V_gc) - fu_b_met*Pgb_inf_met*S_dji*y[532:563]/y[75:106]
y[533]	X_gb3_1m	0	nmol	dydt[563] = fu_e_met*Pgb_eff_met*S_asc*X_gc33_1m/(L_asc/L_gtotal*V_gc) - fu_b_met*Pgb_inf_met*S_asc*X_gb33_1m/V_gb33_1
y[534]	X_gb4_1m	0	nmol	dydt[564] = fu_e_met*Pgb_eff_met*S_tsc*X_gc34_1m/(L_tsc/L_gtotal*V_gc) - fu_b_met*Pgb_inf_met*S_tsc*X_gb34_1m/V_gb34_1
y[535]	X_gb5_1m	0	nmol	dydt[565] = fu_e_met*Pgb_eff_met*S_tsc*X_gc35_1m/(L_tsc/L_gtotal*V_gc) - fu_b_met*Pgb_inf_met*S_tsc*X_gb35_1m/V_gb35_1
y[536]	X_gb6_1m	0	nmol	dydt[566] = fu_e_met*Pgb_eff_met*S_dsc*X_gc36_1m/(L_dsc/L_gtotal*V_gc) - fu_b_met*Pgb_inf_met*S_dsc*X_gb36_1m/V_gb36_1
y[537]	X_gb7_1m	0	nmol	dydt[567] = fu_e_met*Pgb_eff_met*S_rec*X_gc37_1m/(L_rec/L_gtotal*V_gc) - fu_b_met*Pgb_inf_met*S_rec*X_gb37_1m/V_gb37_1
y[538]	X_gb8_1m	0	nmol
y[539]	X_gb9_1m	0	nmol
y[540]	X_gb10_1m	0	nmol
y[541]	X_gb11_1m	0	nmol
y[542]	X_gb12_1m	0	nmol
y[543]	X_gb13_1m	0	nmol
y[544]	X_gb14_1m	0	nmol
y[545]	X_gb15_1m	0	nmol
y[546]	X_gb16_1m	0	nmol
y[547]	X_gb17_1m	0	nmol
y[548]	X_gb18_1m	0	nmol
y[549]	X_gb19_1m	0	nmol
y[550]	X_gb20_1m	0	nmol
y[551]	X_gb21_1m	0	nmol
y[552]	X_gb22_1m	0	nmol
y[553]	X_gb23_1m	0	nmol
y[554]	X_gb24_1m	0	nmol
y[555]	X_gb25_1m	0	nmol
y[556]	X_gb26_1m	0	nmol
y[557]	X_gb27_1m	0	nmol
y[558]	X_gb28_1m	0	nmol
y[559]	X_gb29_1m	0	nmol
y[560]	X_gb30_1m	0	nmol
y[561]	X_gb31_1m	0	nmol
y[562]	X_gb32_1m	0	nmol
y[563]	X_gb33_1m	0	nmol
y[564]	X_gb34_1m	0	nmol
y[565]	X_gb35_1m	0	nmol
y[566]	X_gb36_1m	0	nmol
y[567]	X_gb37_1m	0	nmol
y[568]	X_gf1_1m	0	nmol
y[569]	X_gf2_1m	0	nmol	dydt[569:600] = fu_e_met*Pgf_eff_met*S_dji*y[617:648]/(L_dji/L_gtotal*V_gc) - y[112:143]/(y[112:143]+y[150:181])*Pgf_inf_met*S_dji*y[569:600]/y[112:143]
y[570]	X_gf3_1m	0	nmol	dydt[600] = fu_e_met*Pgf_eff_met*S_asc*X_gc33_1m/(L_asc/L_gtotal*V_gc) - V_gf33_1/(V_gf33_1+W_gr33_1)*Pgf_inf_met*S_asc*X_gf33_1m/V_gf33_1
y[571]	X_gf4_1m	0	nmol	dydt[601] = fu_e_met*Pgf_eff_met*S_tsc*X_gc34_1m/(L_tsc/L_gtotal*V_gc) - V_gf34_1/(V_gf34_1+W_gr34_1)*Pgf_inf_met*S_tsc*X_gf34_1m/V_gf34_1 - ka_fece*X_gf34_1m
y[572]	X_gf5_1m	0	nmol	dydt[602] = fu_e_met*Pgf_eff_met*S_tsc*X_gc35_1m/(L_tsc/L_gtotal*V_gc) - V_gf35_1/(V_gf35_1+W_gr35_1)*Pgf_inf_met*S_tsc*X_gf35_1m/V_gf35_1 - ka_fece*X_gf35_1m
y[573]	X_gf6_1m	0	nmol	dydt[603] = fu_e_met*Pgf_eff_met*S_dsc*X_gc36_1m/(L_dsc/L_gtotal*V_gc) - V_gf36_1/(V_gf36_1+W_gr36_1)*Pgf_inf_met*S_dsc*X_gf36_1m/V_gf36_1 - ka_fece*X_gf36_1m
y[574]	X_gf7_1m	0	nmol	dydt[604] = fu_e_met*Pgf_eff_met*S_rec*X_gc37_1m/(L_rec/L_gtotal*V_gc) - V_gf37_1/(V_gf37_1+W_gr37_1)*Pgf_inf_met*S_rec*X_gf37_1m/V_gf37_1 - ka_fece*X_gf37_1m
y[575]	X_gf8_1m	0	nmol
y[576]	X_gf9_1m	0	nmol
y[577]	X_gf10_1m	0	nmol
y[578]	X_gf11_1m	0	nmol
y[579]	X_gf12_1m	0	nmol
y[580]	X_gf13_1m	0	nmol
y[581]	X_gf14_1m	0	nmol
y[582]	X_gf15_1m	0	nmol
y[583]	X_gf16_1m	0	nmol
y[584]	X_gf17_1m	0	nmol
y[585]	X_gf18_1m	0	nmol
y[586]	X_gf19_1m	0	nmol
y[587]	X_gf20_1m	0	nmol
y[588]	X_gf21_1m	0	nmol
y[589]	X_gf22_1m	0	nmol
y[590]	X_gf23_1m	0	nmol
y[591]	X_gf24_1m	0	nmol
y[592]	X_gf25_1m	0	nmol
y[593]	X_gf26_1m	0	nmol
y[594]	X_gf27_1m	0	nmol
y[595]	X_gf28_1m	0	nmol
y[596]	X_gf29_1m	0	nmol
y[597]	X_gf30_1m	0	nmol
y[598]	X_gf31_1m	0	nmol
y[599]	X_gf32_1m	0	nmol
y[600]	X_gf33_1m	0	nmol
y[601]	X_gf34_1m	0	nmol
y[602]	X_gf35_1m	0	nmol
y[603]	X_gf36_1m	0	nmol
y[604]	X_gf37_1m	0	nmol
y[605]	X_gf_def_1m	0	nmol
y[606]	X_hc1_1m	0	nmol	dydt[606:611] = fu_b_met*PSh_sin_inf_met/5*y[471:476]/(y[14:19]+V_hi/5) - fu_h_met*PSh_sin_eff_met/5*y[606:611]/(V_hc/5) - fu_h_met*PSh_bile_eff_met/5*y[606:611]/(V_hc/5) + fu_h_msz*CLh_met_msz/5*y[335:340]/(V_hc/5)
y[607]	X_hc2_1m	0	nmol
y[608]	X_hc3_1m	0	nmol
y[609]	X_hc4_1m	0	nmol
y[610]	X_hc5_1m	0	nmol
y[611]	X_rc1_1m	0	nmol	dydt[611] = fu_b_met*PSrb_inf_met/5*X_rb1_1m/V_rb1_1 - fu_r_met*PSrb_eff_met/5*X_rc1_1m/V_rc1 + PSru_inf_met/5*X_ru1_1m/V_ru1_1 - fu_r_met*PSru_eff_met/5*X_rc1_1m/V_rc1
y[612]	X_rc2_1m	0	nmol	dydt[612] = fu_b_met*PSrb_inf_met/5*X_rb2_1m/V_rb2_1 - fu_r_met*PSrb_eff_met/5*X_rc2_1m/V_rc2 + np.sum(PSru_inf_met/5*y[33:38]/np.sum(y[33:38])*y[490:495]/y[33:38]) - fu_r_met*PSru_eff_met/5*X_rc2_1m/V_rc2
y[613]	X_rc3_1m	0	nmol	dydt[613] = fu_b_met*PSrb_inf_met/5*X_rb3_1m/V_rb3_1 - fu_r_met*PSrb_eff_met/5*X_rc3_1m/V_rc3 + np.sum(PSru_inf_met/5*y[38:45]/np.sum(y[38:45])*y[495:502]/y[38:45]) - fu_r_met*PSru_eff_met/5*X_rc3_1m/V_rc3
y[614]	X_rc4_1m	0	nmol	dydt[614] = fu_b_met*PSrb_inf_met/5*X_rb4_1m/V_rb4_1 - fu_r_met*PSrb_eff_met/5*X_rc4_1m/V_rc4 + np.sum(PSru_inf_met/5*y[45:49]/np.sum(y[45:49])*y[502:506]/y[45:49]) - fu_r_met*PSru_eff_met/5*X_rc4_1m/V_rc4
y[615]	X_rc5_1m	0	nmol	dydt[615] = fu_b_met*PSrb_inf_met/5*X_rb5_1m/V_rb5_1 - fu_r_met*PSrb_eff_met/5*X_rc5_1m/V_rc5 + np.sum(PSru_inf_met/5*y[49:71]/np.sum(y[49:71])*y[506:528]/y[49:71]) - fu_r_met*PSru_eff_met/5*X_rc5_1m/V_rc5
y[616]	X_gc1_1m	0	nmol
y[617]	X_gc2_1m	0	nmol	dydt[617:648] = -fu_e_met*Pgb_eff_met*S_dji*y[617:648]/(L_dji/L_gtotal*V_gc) + fu_b_met*Pgb_inf_met*S_dji*y[532:563]/y[75:106] - fu_e_met*Pgf_eff_met*S_dji*y[617:648]/(L_dji/L_gtotal*V_gc) + y[112:143]/(y[112:143]+y[150:181])*Pgf_inf_met*S_dji*y[569:600]/y[112:143] + fu_e_msz*CLg_met_msz*y[346:377]/V_gc
y[618]	X_gc3_1m	0	nmol	dydt[648] = -fu_e_met*Pgb_eff_met*S_asc*X_gc33_1m/(L_asc/L_gtotal*V_gc) + fu_b_met*Pgb_inf_met*S_asc*X_gb33_1m/V_gb33_1 - fu_e_met*Pgf_eff_met*S_asc*X_gc33_1m/(L_asc/L_gtotal*V_gc) + V_gf33_1/(V_gf33_1+W_gr33_1)*Pgf_inf_met*S_asc*X_gf33_1m/V_gf33_1 + fu_e_msz*CLg_met_msz*X_gc33_1/V_gc
y[619]	X_gc4_1m	0	nmol	dydt[649] = -fu_e_met*Pgb_eff_met*S_tsc*X_gc34_1m/(L_tsc/L_gtotal*V_gc) + fu_b_met*Pgb_inf_met*S_tsc*X_gb34_1m/V_gb34_1 - fu_e_met*Pgf_eff_met*S_tsc*X_gc34_1m/(L_tsc/L_gtotal*V_gc) + V_gf34_1/(V_gf34_1+W_gr34_1)*Pgf_inf_met*S_tsc*X_gf34_1m/V_gf34_1 + fu_e_msz*CLg_met_msz*X_gc34_1/V_gc
y[620]	X_gc5_1m	0	nmol	dydt[650] = -fu_e_met*Pgb_eff_met*S_tsc*X_gc35_1m/(L_tsc/L_gtotal*V_gc) + fu_b_met*Pgb_inf_met*S_tsc*X_gb35_1m/V_gb35_1 - fu_e_met*Pgf_eff_met*S_tsc*X_gc35_1m/(L_tsc/L_gtotal*V_gc) + V_gf35_1/(V_gf35_1+W_gr35_1)*Pgf_inf_met*S_tsc*X_gf35_1m/V_gf35_1 + fu_e_msz*CLg_met_msz*X_gc35_1/V_gc
y[621]	X_gc6_1m	0	nmol	dydt[651] = -fu_e_met*Pgb_eff_met*S_dsc*X_gc36_1m/(L_dsc/L_gtotal*V_gc) + fu_b_met*Pgb_inf_met*S_dsc*X_gb36_1m/V_gb36_1 - fu_e_met*Pgf_eff_met*S_dsc*X_gc36_1m/(L_dsc/L_gtotal*V_gc) + V_gf36_1/(V_gf36_1+W_gr36_1)*Pgf_inf_met*S_dsc*X_gf36_1m/V_gf36_1 + fu_e_msz*CLg_met_msz*X_gc36_1/V_gc
y[622]	X_gc7_1m	0	nmol	dydt[652] = -fu_e_met*Pgb_eff_met*S_rec*X_gc37_1m/(L_rec/L_gtotal*V_gc) + fu_b_met*Pgb_inf_met*S_rec*X_gb37_1m/V_gb37_1 - fu_e_met*Pgf_eff_met*S_rec*X_gc37_1m/(L_rec/L_gtotal*V_gc) + V_gf37_1/(V_gf37_1+W_gr37_1)*Pgf_inf_met*S_rec*X_gf37_1m/V_gf37_1 + fu_e_msz*CLg_met_msz*X_gc37_1/V_gc
y[623]	X_gc8_1m	0	nmol
y[624]	X_gc9_1m	0	nmol
y[625]	X_gc10_1m	0	nmol
y[626]	X_gc11_1m	0	nmol
y[627]	X_gc12_1m	0	nmol
y[628]	X_gc13_1m	0	nmol
y[629]	X_gc14_1m	0	nmol
y[630]	X_gc15_1m	0	nmol
y[631]	X_gc16_1m	0	nmol
y[632]	X_gc17_1m	0	nmol
y[633]	X_gc18_1m	0	nmol
y[634]	X_gc19_1m	0	nmol
y[635]	X_gc20_1m	0	nmol
y[636]	X_gc21_1m	0	nmol
y[637]	X_gc22_1m	0	nmol
y[638]	X_gc23_1m	0	nmol
y[639]	X_gc24_1m	0	nmol
y[640]	X_gc25_1m	0	nmol
y[641]	X_gc26_1m	0	nmol
y[642]	X_gc27_1m	0	nmol
y[643]	X_gc28_1m	0	nmol
y[644]	X_gc29_1m	0	nmol
y[645]	X_gc30_1m	0	nmol
y[646]	X_gc31_1m	0	nmol
y[647]	X_gc32_1m	0	nmol
y[648]	X_gc33_1m	0	nmol
y[649]	X_gc34_1m	0	nmol
y[650]	X_gc35_1m	0	nmol
y[651]	X_gc36_1m	0	nmol
y[652]	X_gc37_1m	0	nmol
y[653]	X_total_1m	0	nmol
y[654]	C_vein_1	0	nmol/mL
y[655]	C_vein_1m	0	nmol/mL
y[656]	AUC_1	0	nmol/mL・min
y[657]	AUC_1m	0	nmol/mL・min
y[658]	X_total_1all	0	nmol
y[659]	X_sumdef_1	0	nmol
y[660]	X_sumdef_1m	0	nmol
y[661]	X_sumuri_1	0	nmol
y[662]	X_sumuri_1m	0	nmol
y[663]	X_gx34_1	0	nmol	dydt[663] = ka_fece*X_gf34_1 + ka_fece*X_gp34_1
y[664]	X_gx35_1	0	nmol	dydt[664] = ka_fece*X_gf35_1 + ka_fece*X_gp35_1
y[665]	X_gx36_1	0	nmol	dydt[665] = ka_fece*X_gf36_1 + ka_fece*X_gp36_1
y[666]	X_gx37_1	0	nmol	dydt[666] = ka_fece*X_gf37_1 + ka_fece*X_gp37_1
y[667]	X_gx_def_1	0	nmol
y[668]	X_gx34_1m	0	nmol	dydt[668] = ka_fece*X_gf34_1m
y[669]	X_gx35_1m	0	nmol	dydt[669] = ka_fece*X_gf35_1m
y[670]	X_gx36_1m	0	nmol	dydt[670] = ka_fece*X_gf36_1m
y[671]	X_gx37_1m	0	nmol	dydt[671] = ka_fece*X_gf37_1m
y[672]	X_gx_def_1m	0	nmol
y[673]	V_insensible_1	0	mL	dydt[673] = Iw_skin + Iw_exhale
y[674]	fe_u_1	0	-
y[675]	fe_u_1m	0	-
y[676]	Dummy				print("dVtotal,1:", np.sum(dydt[2:147]) - np.sum(dydt[4:8]) - dydt[10])
y[677]	Dummy				print("dVtotal,2:", np.sum(dydt[702:847]) - np.sum(dydt[704:708]) - dydt[710])
y[678]	Dummy				print("dVtotal,3:", np.sum(dydt[1402:1547]) - np.sum(dydt[1404:1408]) - dydt[1410])
y[679]	Dummy				print("dVtotal,4:", np.sum(dydt[2102:2247]) - np.sum(dydt[2104:2108]) - dydt[2110])
y[680]	Dummy				print("dXtotal,1:", np.sum(dydt[188:458]))
y[681]	Dummy				print("dXtotal,2:", np.sum(dydt[885:1150]))
y[682]	Dummy				print("dXtotal,3:", np.sum(dydt[1585:1850]))
y[683]	Dummy				print("dXtotal,4:", np.sum(dydt[2285:2550]))
y[684]	Dummy				print("dXtotal,1m:", np.sum(dydt[459:653]))
y[685]	Dummy				print("dXtotal,2m:", np.sum(dydt[1151:1342]))
y[686]	Dummy				print("dXtotal,3m:", np.sum(dydt[1851:2042]))
y[687]	Dummy				print("dXtotal,4m:", np.sum(dydt[2551:2742]))
y[688]	Dummy				print("dXtotal,1all:", np.sum(dydt[188:458])+np.sum(dydt[459:653]))
y[689]	Dummy				print("dXtotal,2all:", np.sum(dydt[885:1150])+np.sum(dydt[1151:1342]))
y[690]	Dummy				print("dXtotal,3all:", np.sum(dydt[1585:1850])+np.sum(dydt[1851:2042]))
y[691]	Dummy				print("dXtotal,4all:", np.sum(dydt[2285:2550])+np.sum(dydt[2551:2742]))
y[692]	Dummy
y[693]	Dummy
y[694]	Dummy
y[695]	Dummy
y[696]	Dummy
y[697]	Dummy
y[698]	Dummy
y[699]	Dummy
y[700]	t_meal_2	10740	min		#2 Pentasa
y[701]	phase_gbd_2	2	-
y[702]	V_vein_2	3292.6	mL	dydt[702] = Iw_gbd_abs - Iw_if*(V_vein_2/V_vein_base - 1)
y[703]	V_rheart_2	78.4029	mL
y[704]	V_pb1_2	78.4028	mL	dydt[704:708] = -Iw_exhale/4
y[705]	V_pb2_2	78.4021	mL
y[706]	V_pb3_2	78.4014	mL
y[707]	V_pb4_2	78.4006	mL
y[708]	V_lheart_2	78.4	mL
y[709]	V_artery_2	994.296	mL
y[710]	V_other_2	17840.3	mL	dydt[710] = -Iw_skin
y[711]	V_if_2	1544.14	mL	dydt[711] = Iw_pv*(V_pv_2/V_pv_base - 1) + Iw_if*(V_vein_2/V_vein_base - 1)
y[712]	V_pv_2	79.1423	mL	dydt[712] = -Iw_pv*(V_pv_2/V_pv_base - 1)
y[713]	V_hb_inlet_2	36.25	mL
y[714]	V_fhb1_2	36.2476	mL	dydt[714:719] = -Iw_hbile/5
y[715]	V_fhb2_2	36.2452	mL
y[716]	V_fhb3_2	36.2428	mL
y[717]	V_fhb4_2	36.2404	mL
y[718]	V_fhb5_2	36.238	mL
y[719]	V_hb_outlet_2	36.238	mL
y[720]	V_hduct_2	0.479	mL	dydt[720] = Iw_hbile
y[721]	V_gbd_2	20.0031	mL	dydt[721] = -Iw_gbd_abs
y[722]	V_bduct_2	0.3832	mL
y[723]	V_gbd_empty_2	0.192063	mL
y[724]	V_gbd_refill_2	0.287863	mL
y[725]	V_rb_glm_2	5	mL
y[726]	V_rb1_2	4.69996	mL	dydt[726] = kw_r_px*V_ru1_2
y[727]	V_rb2_2	4.75958	mL	dydt[727] = np.sum(kw_r_hd*y[733:738])
y[728]	V_rb3_2	4.77215	mL	dydt[728] = np.sum(kw_r_ha*y[738:745])
y[729]	V_rb4_2	4.78541	mL	dydt[729] = np.sum(kw_r_ds*y[745:749])
y[730]	V_rb5_2	4.9092	mL	dydt[730] = np.sum(kw_r_cd*(V_if_base/V_if_2)**2.5*y[749:771])
y[731]	V_ru0_2	9	mL
y[732]	V_ru1_2	3.52963	mL	dydt[732] = -kw_r_px*V_ru1_2
y[733]	V_ru2_2	3.13468	mL	dydt[733:738] = -kw_r_hd*y[733:738]
y[734]	V_ru3_2	2.93102	mL	dydt[738:745] = -kw_r_ha*y[738:745]
y[735]	V_ru4_2	2.73985	mL	dydt[745:749] = -kw_r_ds*y[745:749]
y[736]	V_ru5_2	2.56144	mL	dydt[749:771] = -kw_r_cd*(V_if_base/V_if_2)**2.5*y[749:771]
y[737]	V_ru6_2	2.39534	mL
y[738]	V_ru7_2	2.38567	mL
y[739]	V_ru8_2	2.3839	mL
y[740]	V_ru9_2	2.38244	mL
y[741]	V_ru10_2	2.38149	mL
y[742]	V_ru11_2	2.3799	mL
y[743]	V_ru12_2	2.37844	mL
y[744]	V_ru13_2	2.37699	mL
y[745]	V_ru14_2	2.37506	mL
y[746]	V_ru15_2	2.37245	mL
y[747]	V_ru16_2	2.37029	mL
y[748]	V_ru17_2	2.36768	mL
y[749]	V_ru18_2	1.81879	mL
y[750]	V_ru19_2	1.37712	mL
y[751]	V_ru20_2	1.04254	mL
y[752]	V_ru21_2	0.789361	mL
y[753]	V_ru22_2	0.597666	mL
y[754]	V_ru23_2	0.452524	mL
y[755]	V_ru24_2	0.342677	mL
y[756]	V_ru25_2	0.259448	mL
y[757]	V_ru26_2	0.196448	mL
y[758]	V_ru27_2	0.148763	mL
y[759]	V_ru28_2	0.112667	mL
y[760]	V_ru29_2	0.0852935	mL
y[761]	V_ru30_2	0.0645904	mL
y[762]	V_ru31_2	0.0489284	mL
y[763]	V_ru32_2	0.0370483	mL
y[764]	V_ru33_2	0.0280568	mL
y[765]	V_ru34_2	0.0212494	mL
y[766]	V_ru35_2	0.016095	mL
y[767]	V_ru36_2	0.0121888	mL
y[768]	V_ru37_2	0.00923187	mL
y[769]	V_ru38_2	0.00699216	mL
y[770]	V_ru39_2	0.00529584	mL
y[771]	V_ubd_2	33.2122	mL
y[772]	V_urinated_2	0	mL
y[773]	V_gb_ma_2	39.6	mL
y[774]	V_gb1_2	0.941353	mL	dydt[774] = -Iw_stm
y[775]	V_gb2_2	1.01538	mL
y[776]	V_gb3_2	1.04408	mL	dydt[776:806] = (pi_cop - P_cap - (n_eff_min+y[850:880]/MWeff)*(R_gas*T_body)/y[813:843])/Rw_small
y[777]	V_gb4_2	1.04332	mL
y[778]	V_gb5_2	1.03286	mL
y[779]	V_gb6_2	1.01538	mL
y[780]	V_gb7_2	1.01538	mL
y[781]	V_gb8_2	1.01538	mL
y[782]	V_gb9_2	1.01538	mL
y[783]	V_gb10_2	1.01538	mL
y[784]	V_gb11_2	1.01538	mL
y[785]	V_gb12_2	1.01538	mL
y[786]	V_gb13_2	1.01538	mL
y[787]	V_gb14_2	1.01538	mL
y[788]	V_gb15_2	1.01538	mL
y[789]	V_gb16_2	1.01538	mL
y[790]	V_gb17_2	1.01538	mL
y[791]	V_gb18_2	1.01538	mL
y[792]	V_gb19_2	1.01538	mL
y[793]	V_gb20_2	1.01538	mL
y[794]	V_gb21_2	1.01538	mL
y[795]	V_gb22_2	1.01538	mL
y[796]	V_gb23_2	1.01538	mL
y[797]	V_gb24_2	1.01538	mL
y[798]	V_gb25_2	1.01538	mL
y[799]	V_gb26_2	1.01538	mL
y[800]	V_gb27_2	1.01538	mL
y[801]	V_gb28_2	1.01538	mL
y[802]	V_gb29_2	1.01538	mL
y[803]	V_gb30_2	1.01538	mL
y[804]	V_gb31_2	1.01538	mL
y[805]	V_gb32_2	1.01538	mL
y[806]	V_gb33_2	0.763227	mL	dydt[806] = Iw_large * (V_gf33_2/(V_gf33_2+W_gr33_2)/0.75 - 1) if W_gr33_2 > 0 else 0
y[807]	V_gb34_2	1.2701	mL	dydt[807] = Iw_large * (V_gf34_2/(V_gf34_2+W_gr34_2)/0.75 - 1) if W_gr34_2 > 0 else 0
y[808]	V_gb35_2	1.26934	mL	dydt[808] = Iw_large * (V_gf35_2/(V_gf35_2+W_gr35_2)/0.75 - 1) if W_gr35_2 > 0 else 0
y[809]	V_gb36_2	3.04615	mL	dydt[809] = Iw_large * (V_gf36_2/(V_gf36_2+W_gr36_2)/0.75 - 1) if W_gr36_2 > 0 else 0
y[810]	V_gb37_2	0.761538	mL	dydt[810] = Iw_large * (V_gf37_2/(V_gf37_2+W_gr37_2)/0.75 - 1) if W_gr37_2 > 0 else 0
y[811]	V_gf1_2	24.6279	mL	dydt[811] = Iw_stm
y[812]	V_gf2_2	15.4082	mL
y[813]	V_gf3_2	9.53772	mL	dydt[813:843] = -(pi_cop - P_cap - (n_eff_min+y[850:880]/MWeff)*(R_gas*T_body)/y[813:843])/Rw_small
y[814]	V_gf4_2	4.86462	mL
y[815]	V_gf5_2	0.63152	mL
y[816]	V_gf6_2	0.266298	mL
y[817]	V_gf7_2	0.272032	mL
y[818]	V_gf8_2	0.277765	mL
y[819]	V_gf9_2	0.283499	mL
y[820]	V_gf10_2	0.289232	mL
y[821]	V_gf11_2	0.294965	mL
y[822]	V_gf12_2	0.300698	mL
y[823]	V_gf13_2	0.306432	mL
y[824]	V_gf14_2	0.312165	mL
y[825]	V_gf15_2	0.317898	mL
y[826]	V_gf16_2	0.323632	mL
y[827]	V_gf17_2	0.329365	mL
y[828]	V_gf18_2	0.335098	mL
y[829]	V_gf19_2	0.340831	mL
y[830]	V_gf20_2	0.346565	mL
y[831]	V_gf21_2	0.352298	mL
y[832]	V_gf22_2	0.358031	mL
y[833]	V_gf23_2	0.363765	mL
y[834]	V_gf24_2	0.369498	mL
y[835]	V_gf25_2	0.375231	mL
y[836]	V_gf26_2	0.380964	mL
y[837]	V_gf27_2	0.386698	mL
y[838]	V_gf28_2	0.392431	mL
y[839]	V_gf29_2	0.398164	mL
y[840]	V_gf30_2	0.403898	mL
y[841]	V_gf31_2	0.409631	mL
y[842]	V_gf32_2	0.415364	mL
y[843]	V_gf33_2	5.84363	mL	dydt[843] = -Iw_large * (V_gf33_2/(V_gf33_2+W_gr33_2)/0.75 - 1) if W_gr33_2 > 0 else 0
y[844]	V_gf34_2	49.1307	mL	dydt[844] = -Iw_large * (V_gf34_2/(V_gf34_2+W_gr34_2)/0.75 - 1) if W_gr34_2 > 0 else 0
y[845]	V_gf35_2	45.0314	mL	dydt[845] = -Iw_large * (V_gf35_2/(V_gf35_2+W_gr35_2)/0.75 - 1) if W_gr35_2 > 0 else 0
y[846]	V_gf36_2	0.449843	mL	dydt[846] = -Iw_large * (V_gf36_2/(V_gf36_2+W_gr36_2)/0.75 - 1) if W_gr36_2 > 0 else 0
y[847]	V_gf37_2	1.38319	mL	dydt[847] = -Iw_large * (V_gf37_2/(V_gf37_2+W_gr37_2)/0.75 - 1) if W_gr37_2 > 0 else 0
y[848]	V_gf_def_2	0	mL
y[849]	W_gr1_2	2.07314e-28	g
y[850]	W_gr2_2	1.55627e-28	g
y[851]	W_gr3_2	2.58115e-28	g
y[852]	W_gr4_2	0.000687135	g
y[853]	W_gr5_2	0.0013381	g
y[854]	W_gr6_2	0.00199098	g
y[855]	W_gr7_2	0.00264375	g
y[856]	W_gr8_2	0.00329653	g
y[857]	W_gr9_2	0.00394931	g
y[858]	W_gr10_2	0.00460208	g
y[859]	W_gr11_2	0.00525486	g
y[860]	W_gr12_2	0.00590764	g
y[861]	W_gr13_2	0.00656042	g
y[862]	W_gr14_2	0.00721319	g
y[863]	W_gr15_2	0.00786597	g
y[864]	W_gr16_2	0.00851875	g
y[865]	W_gr17_2	0.00917153	g
y[866]	W_gr18_2	0.00982431	g
y[867]	W_gr19_2	0.0104771	g
y[868]	W_gr20_2	0.0111299	g
y[869]	W_gr21_2	0.0117826	g
y[870]	W_gr22_2	0.0124354	g
y[871]	W_gr23_2	0.0130882	g
y[872]	W_gr24_2	0.013741	g
y[873]	W_gr25_2	0.0143938	g
y[874]	W_gr26_2	0.0150465	g
y[875]	W_gr27_2	0.0156993	g
y[876]	W_gr28_2	0.0163521	g
y[877]	W_gr29_2	0.0170049	g
y[878]	W_gr30_2	0.0176576	g
y[879]	W_gr31_2	0.0183104	g
y[880]	W_gr32_2	0.0189632	g
y[881]	W_gr33_2	1.59908	g
y[882]	W_gr34_2	14.8262	g
y[883]	W_gr35_2	14.8262	g
y[884]	W_gr36_2	0	g
y[885]	W_gr37_2	0	g
y[886]	W_gr_def_2	0	g
y[887]	V_total_2	0	nmol
y[888]	X_vein_2	0	nmol
y[889]	X_rheart_2	0	nmol
y[890]	X_pb1_2	0	nmol
y[891]	X_pb2_2	0	nmol
y[892]	X_pb3_2	0	nmol
y[893]	X_pb4_2	0	nmol
y[894]	X_lheart_2	0	nmol
y[895]	X_artery_2	0	nmol
y[896]	X_other_2	0	nmol
y[897]	X_if_2	0	nmol
y[898]	X_pv_2	0	nmol
y[899]	X_hb_inlet_2	0	nmol
y[900]	X_fhb1_2	0	nmol	dydt[900:905] = -fu_b_msz*PSh_sin_inf_msz/5*y[900:905]/(y[714:719]+V_hi/5) + fu_h_msz*PSh_sin_eff_msz/5*y[1035:1040]/(V_hc/5)
y[901]	X_fhb2_2	0	nmol
y[902]	X_fhb3_2	0	nmol
y[903]	X_fhb4_2	0	nmol
y[904]	X_fhb5_2	0	nmol
y[905]	X_hb_outlet_2	0	nmol
y[906]	X_hduct_2	0	nmol	dydt[906] = np.sum(fu_h_msz*PSh_bile_eff_msz/5*y[1035:1040]/(V_hc/5))
y[907]	X_gbd_2	0	nmol
y[908]	X_bduct_2	0	nmol
y[909]	X_gbd_empty_2	0	nmol
y[910]	X_gbd_refill_2	0	nmol
y[911]	X_rb_glm_2	0	nmol
y[912]	X_rb1_2	0	nmol	dydt[912] = -fu_b_msz*PSrb_inf_msz/5*X_rb1_2/V_rb1_2 + fu_r_msz*PSrb_eff_msz/5*X_rc1_2/V_rc1
y[913]	X_rb2_2	0	nmol	dydt[913] = -fu_b_msz*PSrb_inf_msz/5*X_rb2_2/V_rb2_2 + fu_r_msz*PSrb_eff_msz/5*X_rc2_2/V_rc2
y[914]	X_rb3_2	0	nmol	dydt[914] = -fu_b_msz*PSrb_inf_msz/5*X_rb3_2/V_rb3_2 + fu_r_msz*PSrb_eff_msz/5*X_rc3_2/V_rc3
y[915]	X_rb4_2	0	nmol	dydt[915] = -fu_b_msz*PSrb_inf_msz/5*X_rb4_2/V_rb4_2 + fu_r_msz*PSrb_eff_msz/5*X_rc4_2/V_rc4
y[916]	X_rb5_2	0	nmol	dydt[916] = -fu_b_msz*PSrb_inf_msz/5*X_rb5_2/V_rb5_2 + fu_r_msz*PSrb_eff_msz/5*X_rc5_2/V_rc5
y[917]	X_ru0_2	0	nmol
y[918]	X_ru1_2	0	nmol	dydt[918] = -PSru_inf_msz/5*X_ru1_2/V_ru1_2 + fu_r_msz*PSru_eff_msz/5*X_rc1_2/V_rc1
y[919]	X_ru2_2	0	nmol	dydt[919:924] = (-PSru_inf_msz/5*y[919:924]/y[733:738] + fu_r_msz*PSru_eff_msz/5*X_rc2_2/V_rc2)*y[733:738]/np.sum(y[733:738])
y[920]	X_ru3_2	0	nmol	dydt[924:931] = (-PSru_inf_msz/5*y[924:931]/y[738:745] + fu_r_msz*PSru_eff_msz/5*X_rc3_2/V_rc3)*y[738:745]/np.sum(y[738:745])
y[921]	X_ru4_2	0	nmol	dydt[931:935] = (-PSru_inf_msz/5*y[931:935]/y[745:749] + fu_r_msz*PSru_eff_msz/5*X_rc4_2/V_rc4)*y[745:749]/np.sum(y[745:749])
y[922]	X_ru5_2	0	nmol	dydt[935:957] = (-PSru_inf_msz/5*y[935:957]/y[749:771] + fu_r_msz*PSru_eff_msz/5*X_rc5_2/V_rc5)*y[749:771]/np.sum(y[749:771])
y[923]	X_ru6_2	0	nmol
y[924]	X_ru7_2	0	nmol
y[925]	X_ru8_2	0	nmol
y[926]	X_ru9_2	0	nmol
y[927]	X_ru10_2	0	nmol
y[928]	X_ru11_2	0	nmol
y[929]	X_ru12_2	0	nmol
y[930]	X_ru13_2	0	nmol
y[931]	X_ru14_2	0	nmol
y[932]	X_ru15_2	0	nmol
y[933]	X_ru16_2	0	nmol
y[934]	X_ru17_2	0	nmol
y[935]	X_ru18_2	0	nmol
y[936]	X_ru19_2	0	nmol
y[937]	X_ru20_2	0	nmol
y[938]	X_ru21_2	0	nmol
y[939]	X_ru22_2	0	nmol
y[940]	X_ru23_2	0	nmol
y[941]	X_ru24_2	0	nmol
y[942]	X_ru25_2	0	nmol
y[943]	X_ru26_2	0	nmol
y[944]	X_ru27_2	0	nmol
y[945]	X_ru28_2	0	nmol
y[946]	X_ru29_2	0	nmol
y[947]	X_ru30_2	0	nmol
y[948]	X_ru31_2	0	nmol
y[949]	X_ru32_2	0	nmol
y[950]	X_ru33_2	0	nmol
y[951]	X_ru34_2	0	nmol
y[952]	X_ru35_2	0	nmol
y[953]	X_ru36_2	0	nmol
y[954]	X_ru37_2	0	nmol
y[955]	X_ru38_2	0	nmol
y[956]	X_ru39_2	0	nmol
y[957]	X_ubd_2	0	nmol
y[958]	X_urinated_2	0	nmol
y[959]	X_gb_ma_2	0	nmol
y[960]	X_gb1_2	0	nmol
y[961]	X_gb2_2	0	nmol	dydt[961:992] = fu_e_msz*Pgb_eff_msz*S_dji*y[1046:1077]/(L_dji/L_gtotal*V_gc) - fu_b_msz*Pgb_inf_msz*S_dji*y[961:992]/y[775:806]
y[962]	X_gb3_2	0	nmol	dydt[992] = fu_e_msz*Pgb_eff_msz*S_asc*X_gc33_2/(L_asc/L_gtotal*V_gc) - fu_b_msz*Pgb_inf_msz*S_asc*X_gb33_2/V_gb33_2
y[963]	X_gb4_2	0	nmol	dydt[993] = fu_e_msz*Pgb_eff_msz*S_tsc*X_gc34_2/(L_tsc/L_gtotal*V_gc) - fu_b_msz*Pgb_inf_msz*S_tsc*X_gb34_2/V_gb34_2
y[964]	X_gb5_2	0	nmol	dydt[994] = fu_e_msz*Pgb_eff_msz*S_tsc*X_gc35_2/(L_tsc/L_gtotal*V_gc) - fu_b_msz*Pgb_inf_msz*S_tsc*X_gb35_2/V_gb35_2
y[965]	X_gb6_2	0	nmol	dydt[995] = fu_e_msz*Pgb_eff_msz*S_dsc*X_gc36_2/(L_dsc/L_gtotal*V_gc) - fu_b_msz*Pgb_inf_msz*S_dsc*X_gb36_2/V_gb36_2
y[966]	X_gb7_2	0	nmol	dydt[996] = fu_e_msz*Pgb_eff_msz*S_rec*X_gc37_2/(L_rec/L_gtotal*V_gc) - fu_b_msz*Pgb_inf_msz*S_rec*X_gb37_2/V_gb37_2
y[967]	X_gb8_2	0	nmol
y[968]	X_gb9_2	0	nmol
y[969]	X_gb10_2	0	nmol
y[970]	X_gb11_2	0	nmol
y[971]	X_gb12_2	0	nmol
y[972]	X_gb13_2	0	nmol
y[973]	X_gb14_2	0	nmol
y[974]	X_gb15_2	0	nmol
y[975]	X_gb16_2	0	nmol
y[976]	X_gb17_2	0	nmol
y[977]	X_gb18_2	0	nmol
y[978]	X_gb19_2	0	nmol
y[979]	X_gb20_2	0	nmol
y[980]	X_gb21_2	0	nmol
y[981]	X_gb22_2	0	nmol
y[982]	X_gb23_2	0	nmol
y[983]	X_gb24_2	0	nmol
y[984]	X_gb25_2	0	nmol
y[985]	X_gb26_2	0	nmol
y[986]	X_gb27_2	0	nmol
y[987]	X_gb28_2	0	nmol
y[988]	X_gb29_2	0	nmol
y[989]	X_gb30_2	0	nmol
y[990]	X_gb31_2	0	nmol
y[991]	X_gb32_2	0	nmol
y[992]	X_gb33_2	0	nmol
y[993]	X_gb34_2	0	nmol
y[994]	X_gb35_2	0	nmol
y[995]	X_gb36_2	0	nmol
y[996]	X_gb37_2	0	nmol
y[997]	X_gf1_2	0	nmol	dydt[997] = k_dissol_a_pentasa*X_gp1_2
y[998]	X_gf2_2	0	nmol	dydt[998:1029] = fu_e_msz*Pgf_eff_msz*S_dji*y[1046:1077]/(L_dji/L_gtotal*V_gc) - y[812:843]/(y[812:843]+y[850:881])*Pgf_inf_msz*S_dji*y[998:1029]/y[812:843] + k_dissol_n_pentasa*y[1083:1114]
y[999]	X_gf3_2	0	nmol	dydt[1029] = fu_e_msz*Pgf_eff_msz*S_asc*X_gc33_2/(L_asc/L_gtotal*V_gc) - V_gf33_2/(V_gf33_2+W_gr33_2)*Pgf_inf_msz*S_asc*X_gf33_2/V_gf33_2 + k_dissol_n_pentasa*X_gp33_2
y[1000]	X_gf4_2	0	nmol	dydt[1030] = fu_e_msz*Pgf_eff_msz*S_tsc*X_gc34_2/(L_tsc/L_gtotal*V_gc) - V_gf34_2/(V_gf34_2+W_gr34_2)*Pgf_inf_msz*S_tsc*X_gf34_2/V_gf34_2 + k_dissol_n_pentasa*X_gp34_2 - ka_fece*X_gf34_2
y[1001]	X_gf5_2	0	nmol	dydt[1031] = fu_e_msz*Pgf_eff_msz*S_tsc*X_gc35_2/(L_tsc/L_gtotal*V_gc) - V_gf35_2/(V_gf35_2+W_gr35_2)*Pgf_inf_msz*S_tsc*X_gf35_2/V_gf35_2 + k_dissol_n_pentasa*X_gp35_2 - ka_fece*X_gf35_2
y[1002]	X_gf6_2	0	nmol	dydt[1032] = fu_e_msz*Pgf_eff_msz*S_dsc*X_gc36_2/(L_dsc/L_gtotal*V_gc) - V_gf36_2/(V_gf36_2+W_gr36_2)*Pgf_inf_msz*S_dsc*X_gf36_2/V_gf36_2 + k_dissol_n_pentasa*X_gp36_2 - ka_fece*X_gf36_2
y[1003]	X_gf7_2	0	nmol	dydt[1033] = fu_e_msz*Pgf_eff_msz*S_rec*X_gc37_2/(L_rec/L_gtotal*V_gc) - V_gf37_2/(V_gf37_2+W_gr37_2)*Pgf_inf_msz*S_rec*X_gf37_2/V_gf37_2 + k_dissol_n_pentasa*X_gp37_2 - ka_fece*X_gf37_2
y[1004]	X_gf8_2	0	nmol
y[1005]	X_gf9_2	0	nmol
y[1006]	X_gf10_2	0	nmol
y[1007]	X_gf11_2	0	nmol
y[1008]	X_gf12_2	0	nmol
y[1009]	X_gf13_2	0	nmol
y[1010]	X_gf14_2	0	nmol
y[1011]	X_gf15_2	0	nmol
y[1012]	X_gf16_2	0	nmol
y[1013]	X_gf17_2	0	nmol
y[1014]	X_gf18_2	0	nmol
y[1015]	X_gf19_2	0	nmol
y[1016]	X_gf20_2	0	nmol
y[1017]	X_gf21_2	0	nmol
y[1018]	X_gf22_2	0	nmol
y[1019]	X_gf23_2	0	nmol
y[1020]	X_gf24_2	0	nmol
y[1021]	X_gf25_2	0	nmol
y[1022]	X_gf26_2	0	nmol
y[1023]	X_gf27_2	0	nmol
y[1024]	X_gf28_2	0	nmol
y[1025]	X_gf29_2	0	nmol
y[1026]	X_gf30_2	0	nmol
y[1027]	X_gf31_2	0	nmol
y[1028]	X_gf32_2	0	nmol
y[1029]	X_gf33_2	0	nmol
y[1030]	X_gf34_2	0	nmol
y[1031]	X_gf35_2	0	nmol
y[1032]	X_gf36_2	0	nmol
y[1033]	X_gf37_2	0	nmol
y[1034]	X_gf_def_2	0	nmol
y[1035]	X_hc1_2	0	nmol	dydt[1035:1040] = fu_b_msz*PSh_sin_inf_msz/5*y[900:905]/(y[714:719]+V_hi/5) - fu_h_msz*PSh_sin_eff_msz/5*y[1035:1040]/(V_hc/5) - fu_h_msz*PSh_bile_eff_msz/5*y[1035:1040]/(V_hc/5) - fu_h_msz*CLh_met_msz/5*y[1035:1040]/(V_hc/5)
y[1036]	X_hc2_2	0	nmol
y[1037]	X_hc3_2	0	nmol
y[1038]	X_hc4_2	0	nmol
y[1039]	X_hc5_2	0	nmol
y[1040]	X_rc1_2	0	nmol	dydt[1040] = fu_b_msz*PSrb_inf_msz/5*X_rb1_2/V_rb1_2 - fu_r_msz*PSrb_eff_msz/5*X_rc1_2/V_rc1 + PSru_inf_msz/5*X_ru1_2/V_ru1_2 - fu_r_msz*PSru_eff_msz/5*X_rc1_2/V_rc1
y[1041]	X_rc2_2	0	nmol	dydt[1041] = fu_b_msz*PSrb_inf_msz/5*X_rb2_2/V_rb2_2 - fu_r_msz*PSrb_eff_msz/5*X_rc2_2/V_rc2 + np.sum(PSru_inf_msz/5*y[733:738]/np.sum(y[733:738])*y[919:924]/y[733:738]) - fu_r_msz*PSru_eff_msz/5*X_rc2_2/V_rc2
y[1042]	X_rc3_2	0	nmol	dydt[1042] = fu_b_msz*PSrb_inf_msz/5*X_rb3_2/V_rb3_2 - fu_r_msz*PSrb_eff_msz/5*X_rc3_2/V_rc3 + np.sum(PSru_inf_msz/5*y[738:745]/np.sum(y[738:745])*y[924:931]/y[738:745]) - fu_r_msz*PSru_eff_msz/5*X_rc3_2/V_rc3
y[1043]	X_rc4_2	0	nmol	dydt[1043] = fu_b_msz*PSrb_inf_msz/5*X_rb4_2/V_rb4_2 - fu_r_msz*PSrb_eff_msz/5*X_rc4_2/V_rc4 + np.sum(PSru_inf_msz/5*y[745:749]/np.sum(y[745:749])*y[931:935]/y[745:749]) - fu_r_msz*PSru_eff_msz/5*X_rc4_2/V_rc4
y[1044]	X_rc5_2	0	nmol	dydt[1044] = fu_b_msz*PSrb_inf_msz/5*X_rb5_2/V_rb5_2 - fu_r_msz*PSrb_eff_msz/5*X_rc5_2/V_rc5 + np.sum(PSru_inf_msz/5*y[749:771]/np.sum(y[749:771])*y[935:957]/y[749:771]) - fu_r_msz*PSru_eff_msz/5*X_rc5_2/V_rc5
y[1045]	X_gc1_2	0	nmol
y[1046]	X_gc2_2	0	nmol	dydt[1046:1077] = -fu_e_msz*Pgb_eff_msz*S_dji*y[1046:1077]/(L_dji/L_gtotal*V_gc) + fu_b_msz*Pgb_inf_msz*S_dji*y[961:992]/y[775:806] - fu_e_msz*Pgf_eff_msz*S_dji*y[1046:1077]/(L_dji/L_gtotal*V_gc) + y[812:843]/(y[812:843]+y[850:881])*Pgf_inf_msz*S_dji*y[998:1029]/y[812:843] - fu_e_msz*CLg_met_msz*y[1046:1077]/V_gc
y[1047]	X_gc3_2	0	nmol	dydt[1077] = -fu_e_msz*Pgb_eff_msz*S_asc*X_gc33_2/(L_asc/L_gtotal*V_gc) + fu_b_msz*Pgb_inf_msz*S_asc*X_gb33_2/V_gb33_2 - fu_e_msz*Pgf_eff_msz*S_asc*X_gc33_2/(L_asc/L_gtotal*V_gc) + V_gf33_2/(V_gf33_2+W_gr33_2)*Pgf_inf_msz*S_asc*X_gf33_2/V_gf33_2 - fu_e_msz*CLg_met_msz*X_gc33_2/V_gc
y[1048]	X_gc4_2	0	nmol	dydt[1078] = -fu_e_msz*Pgb_eff_msz*S_tsc*X_gc34_2/(L_tsc/L_gtotal*V_gc) + fu_b_msz*Pgb_inf_msz*S_tsc*X_gb34_2/V_gb34_2 - fu_e_msz*Pgf_eff_msz*S_tsc*X_gc34_2/(L_tsc/L_gtotal*V_gc) + V_gf34_2/(V_gf34_2+W_gr34_2)*Pgf_inf_msz*S_tsc*X_gf34_2/V_gf34_2 - fu_e_msz*CLg_met_msz*X_gc34_2/V_gc
y[1049]	X_gc5_2	0	nmol	dydt[1079] = -fu_e_msz*Pgb_eff_msz*S_tsc*X_gc35_2/(L_tsc/L_gtotal*V_gc) + fu_b_msz*Pgb_inf_msz*S_tsc*X_gb35_2/V_gb35_2 - fu_e_msz*Pgf_eff_msz*S_tsc*X_gc35_2/(L_tsc/L_gtotal*V_gc) + V_gf35_2/(V_gf35_2+W_gr35_2)*Pgf_inf_msz*S_tsc*X_gf35_2/V_gf35_2 - fu_e_msz*CLg_met_msz*X_gc35_2/V_gc
y[1050]	X_gc6_2	0	nmol	dydt[1080] = -fu_e_msz*Pgb_eff_msz*S_dsc*X_gc36_2/(L_dsc/L_gtotal*V_gc) + fu_b_msz*Pgb_inf_msz*S_dsc*X_gb36_2/V_gb36_2 - fu_e_msz*Pgf_eff_msz*S_dsc*X_gc36_2/(L_dsc/L_gtotal*V_gc) + V_gf36_2/(V_gf36_2+W_gr36_2)*Pgf_inf_msz*S_dsc*X_gf36_2/V_gf36_2 - fu_e_msz*CLg_met_msz*X_gc36_2/V_gc
y[1051]	X_gc7_2	0	nmol	dydt[1081] = -fu_e_msz*Pgb_eff_msz*S_rec*X_gc37_2/(L_rec/L_gtotal*V_gc) + fu_b_msz*Pgb_inf_msz*S_rec*X_gb37_2/V_gb37_2 - fu_e_msz*Pgf_eff_msz*S_rec*X_gc37_2/(L_rec/L_gtotal*V_gc) + V_gf37_2/(V_gf37_2+W_gr37_2)*Pgf_inf_msz*S_rec*X_gf37_2/V_gf37_2 - fu_e_msz*CLg_met_msz*X_gc37_2/V_gc
y[1052]	X_gc8_2	0	nmol
y[1053]	X_gc9_2	0	nmol
y[1054]	X_gc10_2	0	nmol
y[1055]	X_gc11_2	0	nmol
y[1056]	X_gc12_2	0	nmol
y[1057]	X_gc13_2	0	nmol
y[1058]	X_gc14_2	0	nmol
y[1059]	X_gc15_2	0	nmol
y[1060]	X_gc16_2	0	nmol
y[1061]	X_gc17_2	0	nmol
y[1062]	X_gc18_2	0	nmol
y[1063]	X_gc19_2	0	nmol
y[1064]	X_gc20_2	0	nmol
y[1065]	X_gc21_2	0	nmol
y[1066]	X_gc22_2	0	nmol
y[1067]	X_gc23_2	0	nmol
y[1068]	X_gc24_2	0	nmol
y[1069]	X_gc25_2	0	nmol
y[1070]	X_gc26_2	0	nmol
y[1071]	X_gc27_2	0	nmol
y[1072]	X_gc28_2	0	nmol
y[1073]	X_gc29_2	0	nmol
y[1074]	X_gc30_2	0	nmol
y[1075]	X_gc31_2	0	nmol
y[1076]	X_gc32_2	0	nmol
y[1077]	X_gc33_2	0	nmol
y[1078]	X_gc34_2	0	nmol
y[1079]	X_gc35_2	0	nmol
y[1080]	X_gc36_2	0	nmol
y[1081]	X_gc37_2	0	nmol
y[1082]	X_gp1_2	0	nmol	dydt[1082] = k_disint_capsule*X_gs1_2 - k_dissol_a_pentasa*X_gp1_2
y[1083]	X_gp2_2	0	nmol	dydt[1083:1115] = k_disint_capsule*y[1121:1153] - k_dissol_n_pentasa*y[1083:1115]
y[1084]	X_gp3_2	0	nmol	dydt[1115] = - k_dissol_n_pentasa*X_gp34_2 - ka_fece*X_gp34_2
y[1085]	X_gp4_2	0	nmol	dydt[1116] = - k_dissol_n_pentasa*X_gp35_2 - ka_fece*X_gp35_2
y[1086]	X_gp5_2	0	nmol	dydt[1117] = - k_dissol_n_pentasa*X_gp36_2 - ka_fece*X_gp36_2
y[1087]	X_gp6_2	0	nmol	dydt[1118] = - k_dissol_n_pentasa*X_gp37_2 - ka_fece*X_gp37_2
y[1088]	X_gp7_2	0	nmol
y[1089]	X_gp8_2	0	nmol
y[1090]	X_gp9_2	0	nmol
y[1091]	X_gp10_2	0	nmol
y[1092]	X_gp11_2	0	nmol
y[1093]	X_gp12_2	0	nmol
y[1094]	X_gp13_2	0	nmol
y[1095]	X_gp14_2	0	nmol
y[1096]	X_gp15_2	0	nmol
y[1097]	X_gp16_2	0	nmol
y[1098]	X_gp17_2	0	nmol
y[1099]	X_gp18_2	0	nmol
y[1100]	X_gp19_2	0	nmol
y[1101]	X_gp20_2	0	nmol
y[1102]	X_gp21_2	0	nmol
y[1103]	X_gp22_2	0	nmol
y[1104]	X_gp23_2	0	nmol
y[1105]	X_gp24_2	0	nmol
y[1106]	X_gp25_2	0	nmol
y[1107]	X_gp26_2	0	nmol
y[1108]	X_gp27_2	0	nmol
y[1109]	X_gp28_2	0	nmol
y[1110]	X_gp29_2	0	nmol
y[1111]	X_gp30_2	0	nmol
y[1112]	X_gp31_2	0	nmol
y[1113]	X_gp32_2	0	nmol
y[1114]	X_gp33_2	0	nmol
y[1115]	X_gp34_2	0	nmol
y[1116]	X_gp35_2	0	nmol
y[1117]	X_gp36_2	0	nmol
y[1118]	X_gp37_2	0	nmol
y[1119]	X_gp_def_2	0	nmol
y[1120]	X_gs1_2	0	nmol	dydt[1120] = -k_disint_capsule*X_gs1_2
y[1121]	X_gs2_2	0	nmol	dydt[1121:1153] = -k_disint_capsule*y[1121:1153]
y[1122]	X_gs3_2	0	nmol
y[1123]	X_gs4_2	0	nmol
y[1124]	X_gs5_2	0	nmol
y[1125]	X_gs6_2	0	nmol
y[1126]	X_gs7_2	0	nmol
y[1127]	X_gs8_2	0	nmol
y[1128]	X_gs9_2	0	nmol
y[1129]	X_gs10_2	0	nmol
y[1130]	X_gs11_2	0	nmol
y[1131]	X_gs12_2	0	nmol
y[1132]	X_gs13_2	0	nmol
y[1133]	X_gs14_2	0	nmol
y[1134]	X_gs15_2	0	nmol
y[1135]	X_gs16_2	0	nmol
y[1136]	X_gs17_2	0	nmol
y[1137]	X_gs18_2	0	nmol
y[1138]	X_gs19_2	0	nmol
y[1139]	X_gs20_2	0	nmol
y[1140]	X_gs21_2	0	nmol
y[1141]	X_gs22_2	0	nmol
y[1142]	X_gs23_2	0	nmol
y[1143]	X_gs24_2	0	nmol
y[1144]	X_gs25_2	0	nmol
y[1145]	X_gs26_2	0	nmol
y[1146]	X_gs27_2	0	nmol
y[1147]	X_gs28_2	0	nmol
y[1148]	X_gs29_2	0	nmol
y[1149]	X_gs30_2	0	nmol
y[1150]	X_gs31_2	0	nmol
y[1151]	X_gs32_2	0	nmol
y[1152]	X_gs33_2	0	nmol
y[1153]	X_gs34_2	0	nmol
y[1154]	X_gs35_2	0	nmol
y[1155]	X_gs36_2	0	nmol
y[1156]	X_gs37_2	0	nmol
y[1157]	X_gs_def_2	0	nmol
y[1158]	X_total_2	0	nmol
y[1159]	X_vein_2m	0	nmol
y[1160]	X_rheart_2m	0	nmol
y[1161]	X_pb1_2m	0	nmol
y[1162]	X_pb2_2m	0	nmol
y[1163]	X_pb3_2m	0	nmol
y[1164]	X_pb4_2m	0	nmol
y[1165]	X_lheart_2m	0	nmol
y[1166]	X_artery_2m	0	nmol
y[1167]	X_other_2m	0	nmol
y[1168]	X_if_2m	0	nmol
y[1169]	X_pv_2m	0	nmol
y[1170]	X_hb_inlet_2m	0	nmol
y[1171]	X_fhb1_2m	0	nmol	dydt[1171:1176] = -fu_b_met*PSh_sin_inf_met/5*y[1171:1176]/(y[714:719]+V_hi/5) + fu_h_met*PSh_sin_eff_met/5*y[1306:1311]/(V_hc/5)
y[1172]	X_fhb2_2m	0	nmol
y[1173]	X_fhb3_2m	0	nmol
y[1174]	X_fhb4_2m	0	nmol
y[1175]	X_fhb5_2m	0	nmol
y[1176]	X_hb_outlet_2m	0	nmol
y[1177]	X_hduct_2m	0	nmol	dydt[1177] = np.sum(fu_h_met*PSh_bile_eff_met/5*y[1306:1311]/(V_hc/5))
y[1178]	X_gbd_2m	0	nmol
y[1179]	X_bduct_2m	0	nmol
y[1180]	X_gbd_empty_2m	0	nmol
y[1181]	X_gbd_refill_2m	0	nmol
y[1182]	X_rb_glm_2m	0	nmol
y[1183]	X_rb1_2m	0	nmol	dydt[1183] = -fu_b_met*PSrb_inf_met/5*X_rb1_2m/V_rb1_2 + fu_r_met*PSrb_eff_met/5*X_rc1_2m/V_rc1
y[1184]	X_rb2_2m	0	nmol	dydt[1184] = -fu_b_met*PSrb_inf_met/5*X_rb2_2m/V_rb2_2 + fu_r_met*PSrb_eff_met/5*X_rc2_2m/V_rc2
y[1185]	X_rb3_2m	0	nmol	dydt[1185] = -fu_b_met*PSrb_inf_met/5*X_rb3_2m/V_rb3_2 + fu_r_met*PSrb_eff_met/5*X_rc3_2m/V_rc3
y[1186]	X_rb4_2m	0	nmol	dydt[1186] = -fu_b_met*PSrb_inf_met/5*X_rb4_2m/V_rb4_2 + fu_r_met*PSrb_eff_met/5*X_rc4_2m/V_rc4
y[1187]	X_rb5_2m	0	nmol	dydt[1187] = -fu_b_met*PSrb_inf_met/5*X_rb5_2m/V_rb5_2 + fu_r_met*PSrb_eff_met/5*X_rc5_2m/V_rc5
y[1188]	X_ru0_2m	0	nmol
y[1189]	X_ru1_2m	0	nmol	dydt[1189] = -PSru_inf_met/5*X_ru1_2m/V_ru1_2 + fu_r_met*PSru_eff_met/5*X_rc1_2m/V_rc1
y[1190]	X_ru2_2m	0	nmol	dydt[1190:1195] = (-PSru_inf_met/5*y[1190:1195]/y[733:738] + fu_r_met*PSru_eff_met/5*X_rc2_2m/V_rc2)*y[733:738]/np.sum(y[733:738])
y[1191]	X_ru3_2m	0	nmol	dydt[1195:1202] = (-PSru_inf_met/5*y[1195:1202]/y[738:745] + fu_r_met*PSru_eff_met/5*X_rc3_2m/V_rc3)*y[738:745]/np.sum(y[738:745])
y[1192]	X_ru4_2m	0	nmol	dydt[1202:1206] = (-PSru_inf_met/5*y[1202:1206]/y[745:749] + fu_r_met*PSru_eff_met/5*X_rc4_2m/V_rc4)*y[745:749]/np.sum(y[745:749])
y[1193]	X_ru5_2m	0	nmol	dydt[1206:1228] = (-PSru_inf_met/5*y[1206:1228]/y[749:771] + fu_r_met*PSru_eff_met/5*X_rc5_2m/V_rc5)*y[749:771]/np.sum(y[749:771])
y[1194]	X_ru6_2m	0	nmol
y[1195]	X_ru7_2m	0	nmol
y[1196]	X_ru8_2m	0	nmol
y[1197]	X_ru9_2m	0	nmol
y[1198]	X_ru10_2m	0	nmol
y[1199]	X_ru11_2m	0	nmol
y[1200]	X_ru12_2m	0	nmol
y[1201]	X_ru13_2m	0	nmol
y[1202]	X_ru14_2m	0	nmol
y[1203]	X_ru15_2m	0	nmol
y[1204]	X_ru16_2m	0	nmol
y[1205]	X_ru17_2m	0	nmol
y[1206]	X_ru18_2m	0	nmol
y[1207]	X_ru19_2m	0	nmol
y[1208]	X_ru20_2m	0	nmol
y[1209]	X_ru21_2m	0	nmol
y[1210]	X_ru22_2m	0	nmol
y[1211]	X_ru23_2m	0	nmol
y[1212]	X_ru24_2m	0	nmol
y[1213]	X_ru25_2m	0	nmol
y[1214]	X_ru26_2m	0	nmol
y[1215]	X_ru27_2m	0	nmol
y[1216]	X_ru28_2m	0	nmol
y[1217]	X_ru29_2m	0	nmol
y[1218]	X_ru30_2m	0	nmol
y[1219]	X_ru31_2m	0	nmol
y[1220]	X_ru32_2m	0	nmol
y[1221]	X_ru33_2m	0	nmol
y[1222]	X_ru34_2m	0	nmol
y[1223]	X_ru35_2m	0	nmol
y[1224]	X_ru36_2m	0	nmol
y[1225]	X_ru37_2m	0	nmol
y[1226]	X_ru38_2m	0	nmol
y[1227]	X_ru39_2m	0	nmol
y[1228]	X_ubd_2m	0	nmol
y[1229]	X_urinated_2m	0	nmol
y[1230]	X_gb_ma_2m	0	nmol
y[1231]	X_gb1_2m	0	nmol
y[1232]	X_gb2_2m	0	nmol	dydt[1232:1263] = fu_e_met*Pgb_eff_met*S_dji*y[1317:1348]/(L_dji/L_gtotal*V_gc) - fu_b_met*Pgb_inf_met*S_dji*y[1232:1263]/y[775:806]
y[1233]	X_gb3_2m	0	nmol	dydt[1263] = fu_e_met*Pgb_eff_met*S_asc*X_gc33_2m/(L_asc/L_gtotal*V_gc) - fu_b_met*Pgb_inf_met*S_asc*X_gb33_2m/V_gb33_2
y[1234]	X_gb4_2m	0	nmol	dydt[1264] = fu_e_met*Pgb_eff_met*S_tsc*X_gc34_2m/(L_tsc/L_gtotal*V_gc) - fu_b_met*Pgb_inf_met*S_tsc*X_gb34_2m/V_gb34_2
y[1235]	X_gb5_2m	0	nmol	dydt[1265] = fu_e_met*Pgb_eff_met*S_tsc*X_gc35_2m/(L_tsc/L_gtotal*V_gc) - fu_b_met*Pgb_inf_met*S_tsc*X_gb35_2m/V_gb35_2
y[1236]	X_gb6_2m	0	nmol	dydt[1266] = fu_e_met*Pgb_eff_met*S_dsc*X_gc36_2m/(L_dsc/L_gtotal*V_gc) - fu_b_met*Pgb_inf_met*S_dsc*X_gb36_2m/V_gb36_2
y[1237]	X_gb7_2m	0	nmol	dydt[1267] = fu_e_met*Pgb_eff_met*S_rec*X_gc37_2m/(L_rec/L_gtotal*V_gc) - fu_b_met*Pgb_inf_met*S_rec*X_gb37_2m/V_gb37_2
y[1238]	X_gb8_2m	0	nmol
y[1239]	X_gb9_2m	0	nmol
y[1240]	X_gb10_2m	0	nmol
y[1241]	X_gb11_2m	0	nmol
y[1242]	X_gb12_2m	0	nmol
y[1243]	X_gb13_2m	0	nmol
y[1244]	X_gb14_2m	0	nmol
y[1245]	X_gb15_2m	0	nmol
y[1246]	X_gb16_2m	0	nmol
y[1247]	X_gb17_2m	0	nmol
y[1248]	X_gb18_2m	0	nmol
y[1249]	X_gb19_2m	0	nmol
y[1250]	X_gb20_2m	0	nmol
y[1251]	X_gb21_2m	0	nmol
y[1252]	X_gb22_2m	0	nmol
y[1253]	X_gb23_2m	0	nmol
y[1254]	X_gb24_2m	0	nmol
y[1255]	X_gb25_2m	0	nmol
y[1256]	X_gb26_2m	0	nmol
y[1257]	X_gb27_2m	0	nmol
y[1258]	X_gb28_2m	0	nmol
y[1259]	X_gb29_2m	0	nmol
y[1260]	X_gb30_2m	0	nmol
y[1261]	X_gb31_2m	0	nmol
y[1262]	X_gb32_2m	0	nmol
y[1263]	X_gb33_2m	0	nmol
y[1264]	X_gb34_2m	0	nmol
y[1265]	X_gb35_2m	0	nmol
y[1266]	X_gb36_2m	0	nmol
y[1267]	X_gb37_2m	0	nmol
y[1268]	X_gf1_2m	0	nmol
y[1269]	X_gf2_2m	0	nmol	dydt[1269:1300] = fu_e_met*Pgf_eff_met*S_dji*y[1317:1348]/(L_dji/L_gtotal*V_gc) - y[812:843]/(y[812:843]+y[850:881])*Pgf_inf_met*S_dji*y[1269:1300]/y[812:843]
y[1270]	X_gf3_2m	0	nmol	dydt[1300] = fu_e_met*Pgf_eff_met*S_asc*X_gc33_2m/(L_asc/L_gtotal*V_gc) - V_gf33_2/(V_gf33_2+W_gr33_2)*Pgf_inf_met*S_asc*X_gf33_2m/V_gf33_2
y[1271]	X_gf4_2m	0	nmol	dydt[1301] = fu_e_met*Pgf_eff_met*S_tsc*X_gc34_2m/(L_tsc/L_gtotal*V_gc) - V_gf34_2/(V_gf34_2+W_gr34_2)*Pgf_inf_met*S_tsc*X_gf34_2m/V_gf34_2 - ka_fece*X_gf34_2m
y[1272]	X_gf5_2m	0	nmol	dydt[1302] = fu_e_met*Pgf_eff_met*S_tsc*X_gc35_2m/(L_tsc/L_gtotal*V_gc) - V_gf35_2/(V_gf35_2+W_gr35_2)*Pgf_inf_met*S_tsc*X_gf35_2m/V_gf35_2 - ka_fece*X_gf35_2m
y[1273]	X_gf6_2m	0	nmol	dydt[1303] = fu_e_met*Pgf_eff_met*S_dsc*X_gc36_2m/(L_dsc/L_gtotal*V_gc) - V_gf36_2/(V_gf36_2+W_gr36_2)*Pgf_inf_met*S_dsc*X_gf36_2m/V_gf36_2 - ka_fece*X_gf36_2m
y[1274]	X_gf7_2m	0	nmol	dydt[1304] = fu_e_met*Pgf_eff_met*S_rec*X_gc37_2m/(L_rec/L_gtotal*V_gc) - V_gf37_2/(V_gf37_2+W_gr37_2)*Pgf_inf_met*S_rec*X_gf37_2m/V_gf37_2 - ka_fece*X_gf37_2m
y[1275]	X_gf8_2m	0	nmol
y[1276]	X_gf9_2m	0	nmol
y[1277]	X_gf10_2m	0	nmol
y[1278]	X_gf11_2m	0	nmol
y[1279]	X_gf12_2m	0	nmol
y[1280]	X_gf13_2m	0	nmol
y[1281]	X_gf14_2m	0	nmol
y[1282]	X_gf15_2m	0	nmol
y[1283]	X_gf16_2m	0	nmol
y[1284]	X_gf17_2m	0	nmol
y[1285]	X_gf18_2m	0	nmol
y[1286]	X_gf19_2m	0	nmol
y[1287]	X_gf20_2m	0	nmol
y[1288]	X_gf21_2m	0	nmol
y[1289]	X_gf22_2m	0	nmol
y[1290]	X_gf23_2m	0	nmol
y[1291]	X_gf24_2m	0	nmol
y[1292]	X_gf25_2m	0	nmol
y[1293]	X_gf26_2m	0	nmol
y[1294]	X_gf27_2m	0	nmol
y[1295]	X_gf28_2m	0	nmol
y[1296]	X_gf29_2m	0	nmol
y[1297]	X_gf30_2m	0	nmol
y[1298]	X_gf31_2m	0	nmol
y[1299]	X_gf32_2m	0	nmol
y[1300]	X_gf33_2m	0	nmol
y[1301]	X_gf34_2m	0	nmol
y[1302]	X_gf35_2m	0	nmol
y[1303]	X_gf36_2m	0	nmol
y[1304]	X_gf37_2m	0	nmol
y[1305]	X_gf_def_2m	0	nmol
y[1306]	X_hc1_2m	0	nmol	dydt[1306:1311] = fu_b_met*PSh_sin_inf_met/5*y[1171:1176]/(y[714:719]+V_hi/5) - fu_h_met*PSh_sin_eff_met/5*y[1306:1311]/(V_hc/5) - fu_h_met*PSh_bile_eff_met/5*y[1306:1311]/(V_hc/5) + fu_h_msz*CLh_met_msz/5*y[1035:1040]/(V_hc/5)
y[1307]	X_hc2_2m	0	nmol
y[1308]	X_hc3_2m	0	nmol
y[1309]	X_hc4_2m	0	nmol
y[1310]	X_hc5_2m	0	nmol
y[1311]	X_rc1_2m	0	nmol	dydt[1311] = fu_b_met*PSrb_inf_met/5*X_rb1_2m/V_rb1_2 - fu_r_met*PSrb_eff_met/5*X_rc1_2m/V_rc1 + PSru_inf_met/5*X_ru1_2m/V_ru1_2 - fu_r_met*PSru_eff_met/5*X_rc1_2m/V_rc1
y[1312]	X_rc2_2m	0	nmol	dydt[1312] = fu_b_met*PSrb_inf_met/5*X_rb2_2m/V_rb2_2 - fu_r_met*PSrb_eff_met/5*X_rc2_2m/V_rc2 + np.sum(PSru_inf_met/5*y[733:738]/np.sum(y[733:738])*y[1190:1195]/y[733:738]) - fu_r_met*PSru_eff_met/5*X_rc2_2m/V_rc2
y[1313]	X_rc3_2m	0	nmol	dydt[1313] = fu_b_met*PSrb_inf_met/5*X_rb3_2m/V_rb3_2 - fu_r_met*PSrb_eff_met/5*X_rc3_2m/V_rc3 + np.sum(PSru_inf_met/5*y[738:745]/np.sum(y[738:745])*y[1195:1202]/y[738:745]) - fu_r_met*PSru_eff_met/5*X_rc3_2m/V_rc3
y[1314]	X_rc4_2m	0	nmol	dydt[1314] = fu_b_met*PSrb_inf_met/5*X_rb4_2m/V_rb4_2 - fu_r_met*PSrb_eff_met/5*X_rc4_2m/V_rc4 + np.sum(PSru_inf_met/5*y[745:749]/np.sum(y[745:749])*y[1202:1206]/y[745:749]) - fu_r_met*PSru_eff_met/5*X_rc4_2m/V_rc4
y[1315]	X_rc5_2m	0	nmol	dydt[1315] = fu_b_met*PSrb_inf_met/5*X_rb5_2m/V_rb5_2 - fu_r_met*PSrb_eff_met/5*X_rc5_2m/V_rc5 + np.sum(PSru_inf_met/5*y[749:771]/np.sum(y[749:771])*y[1206:1228]/y[749:771]) - fu_r_met*PSru_eff_met/5*X_rc5_2m/V_rc5
y[1316]	X_gc1_2m	0	nmol
y[1317]	X_gc2_2m	0	nmol	dydt[1317:1348] = -fu_e_met*Pgb_eff_met*S_dji*y[1317:1348]/(L_dji/L_gtotal*V_gc) + fu_b_met*Pgb_inf_met*S_dji*y[1232:1263]/y[775:806] - fu_e_met*Pgf_eff_met*S_dji*y[1317:1348]/(L_dji/L_gtotal*V_gc) + y[812:843]/(y[812:843]+y[850:881])*Pgf_inf_met*S_dji*y[1269:1300]/y[812:843] + fu_e_msz*CLg_met_msz*y[1046:1077]/V_gc
y[1318]	X_gc3_2m	0	nmol	dydt[1348] = -fu_e_met*Pgb_eff_met*S_asc*X_gc33_2m/(L_asc/L_gtotal*V_gc) + fu_b_met*Pgb_inf_met*S_asc*X_gb33_2m/V_gb33_2 - fu_e_met*Pgf_eff_met*S_asc*X_gc33_2m/(L_asc/L_gtotal*V_gc) + V_gf33_2/(V_gf33_2+W_gr33_2)*Pgf_inf_met*S_asc*X_gf33_2m/V_gf33_2 + fu_e_msz*CLg_met_msz*X_gc33_2/V_gc
y[1319]	X_gc4_2m	0	nmol	dydt[1349] = -fu_e_met*Pgb_eff_met*S_tsc*X_gc34_2m/(L_tsc/L_gtotal*V_gc) + fu_b_met*Pgb_inf_met*S_tsc*X_gb34_2m/V_gb34_2 - fu_e_met*Pgf_eff_met*S_tsc*X_gc34_2m/(L_tsc/L_gtotal*V_gc) + V_gf34_2/(V_gf34_2+W_gr34_2)*Pgf_inf_met*S_tsc*X_gf34_2m/V_gf34_2 + fu_e_msz*CLg_met_msz*X_gc34_2/V_gc
y[1320]	X_gc5_2m	0	nmol	dydt[1350] = -fu_e_met*Pgb_eff_met*S_tsc*X_gc35_2m/(L_tsc/L_gtotal*V_gc) + fu_b_met*Pgb_inf_met*S_tsc*X_gb35_2m/V_gb35_2 - fu_e_met*Pgf_eff_met*S_tsc*X_gc35_2m/(L_tsc/L_gtotal*V_gc) + V_gf35_2/(V_gf35_2+W_gr35_2)*Pgf_inf_met*S_tsc*X_gf35_2m/V_gf35_2 + fu_e_msz*CLg_met_msz*X_gc35_2/V_gc
y[1321]	X_gc6_2m	0	nmol	dydt[1351] = -fu_e_met*Pgb_eff_met*S_dsc*X_gc36_2m/(L_dsc/L_gtotal*V_gc) + fu_b_met*Pgb_inf_met*S_dsc*X_gb36_2m/V_gb36_2 - fu_e_met*Pgf_eff_met*S_dsc*X_gc36_2m/(L_dsc/L_gtotal*V_gc) + V_gf36_2/(V_gf36_2+W_gr36_2)*Pgf_inf_met*S_dsc*X_gf36_2m/V_gf36_2 + fu_e_msz*CLg_met_msz*X_gc36_2/V_gc
y[1322]	X_gc7_2m	0	nmol	dydt[1352] = -fu_e_met*Pgb_eff_met*S_rec*X_gc37_2m/(L_rec/L_gtotal*V_gc) + fu_b_met*Pgb_inf_met*S_rec*X_gb37_2m/V_gb37_2 - fu_e_met*Pgf_eff_met*S_rec*X_gc37_2m/(L_rec/L_gtotal*V_gc) + V_gf37_2/(V_gf37_2+W_gr37_2)*Pgf_inf_met*S_rec*X_gf37_2m/V_gf37_2 + fu_e_msz*CLg_met_msz*X_gc37_2/V_gc
y[1323]	X_gc8_2m	0	nmol
y[1324]	X_gc9_2m	0	nmol
y[1325]	X_gc10_2m	0	nmol
y[1326]	X_gc11_2m	0	nmol
y[1327]	X_gc12_2m	0	nmol
y[1328]	X_gc13_2m	0	nmol
y[1329]	X_gc14_2m	0	nmol
y[1330]	X_gc15_2m	0	nmol
y[1331]	X_gc16_2m	0	nmol
y[1332]	X_gc17_2m	0	nmol
y[1333]	X_gc18_2m	0	nmol
y[1334]	X_gc19_2m	0	nmol
y[1335]	X_gc20_2m	0	nmol
y[1336]	X_gc21_2m	0	nmol
y[1337]	X_gc22_2m	0	nmol
y[1338]	X_gc23_2m	0	nmol
y[1339]	X_gc24_2m	0	nmol
y[1340]	X_gc25_2m	0	nmol
y[1341]	X_gc26_2m	0	nmol
y[1342]	X_gc27_2m	0	nmol
y[1343]	X_gc28_2m	0	nmol
y[1344]	X_gc29_2m	0	nmol
y[1345]	X_gc30_2m	0	nmol
y[1346]	X_gc31_2m	0	nmol
y[1347]	X_gc32_2m	0	nmol
y[1348]	X_gc33_2m	0	nmol
y[1349]	X_gc34_2m	0	nmol
y[1350]	X_gc35_2m	0	nmol
y[1351]	X_gc36_2m	0	nmol
y[1352]	X_gc37_2m	0	nmol
y[1353]	X_total_2m	0	nmol
y[1354]	C_vein_2	0	nmol/mL
y[1355]	C_vein_2m	0	nmol/mL
y[1356]	AUC_2	0	nmol/mL・min
y[1357]	AUC_2m	0	nmol/mL・min
y[1358]	X_total_2all	0	nmol
y[1359]	X_sumdef_2	0	nmol
y[1360]	X_sumdef_2m	0	nmol
y[1361]	X_sumuri_2	0	nmol
y[1362]	X_sumuri_2m	0	nmol
y[1363]	X_gx34_2	0	nmol	dydt[1363] = ka_fece*X_gf34_2 + ka_fece*X_gp34_2
y[1364]	X_gx35_2	0	nmol	dydt[1364] = ka_fece*X_gf35_2 + ka_fece*X_gp35_2
y[1365]	X_gx36_2	0	nmol	dydt[1365] = ka_fece*X_gf36_2 + ka_fece*X_gp36_2
y[1366]	X_gx37_2	0	nmol	dydt[1366] = ka_fece*X_gf37_2 + ka_fece*X_gp37_2
y[1367]	X_gx_def_2	0	nmol
y[1368]	X_gx34_2m	0	nmol	dydt[1368] = ka_fece*X_gf34_2m
y[1369]	X_gx35_2m	0	nmol	dydt[1369] = ka_fece*X_gf35_2m
y[1370]	X_gx36_2m	0	nmol	dydt[1370] = ka_fece*X_gf36_2m
y[1371]	X_gx37_2m	0	nmol	dydt[1371] = ka_fece*X_gf37_2m
y[1372]	X_gx_def_2m	0	nmol
y[1373]	V_insensible_2	0	mL	dydt[1373] = Iw_skin + Iw_exhale
y[1374]	fe_u_2	0	-
y[1375]	fe_u_2m	0	-
y[1376]	Dummy
y[1377]	Dummy
y[1378]	Dummy
y[1379]	Dummy
y[1380]	Dummy
y[1381]	Dummy
y[1382]	Dummy
y[1383]	Dummy
y[1384]	Dummy
y[1385]	Dummy
y[1386]	Dummy
y[1387]	Dummy
y[1388]	Dummy
y[1389]	Dummy
y[1390]	Dummy
y[1391]	Dummy
y[1392]	Dummy
y[1393]	Dummy
y[1394]	Dummy
y[1395]	Dummy
y[1396]	Dummy
y[1397]	Dummy
y[1398]	Dummy
y[1399]	Dummy
y[1400]	t_meal_3	10740	min		#3 Apriso
y[1401]	phase_gbd_3	2	-
y[1402]	V_vein_3	3292.6	mL	dydt[1402] = Iw_gbd_abs - Iw_if*(V_vein_3/V_vein_base - 1)
y[1403]	V_rheart_3	78.4029	mL
y[1404]	V_pb1_3	78.4028	mL	dydt[1404:1408] = -Iw_exhale/4
y[1405]	V_pb2_3	78.4021	mL
y[1406]	V_pb3_3	78.4014	mL
y[1407]	V_pb4_3	78.4006	mL
y[1408]	V_lheart_3	78.4	mL
y[1409]	V_artery_3	994.296	mL
y[1410]	V_other_3	17840.3	mL	dydt[1410] = -Iw_skin
y[1411]	V_if_3	1544.14	mL	dydt[1411] = Iw_pv*(V_pv_3/V_pv_base - 1) + Iw_if*(V_vein_3/V_vein_base - 1)
y[1412]	V_pv_3	79.1423	mL	dydt[1412] = -Iw_pv*(V_pv_3/V_pv_base - 1)
y[1413]	V_hb_inlet_3	36.25	mL
y[1414]	V_fhb1_3	36.2476	mL	dydt[1414:1419] = -Iw_hbile/5
y[1415]	V_fhb2_3	36.2452	mL
y[1416]	V_fhb3_3	36.2428	mL
y[1417]	V_fhb4_3	36.2404	mL
y[1418]	V_fhb5_3	36.238	mL
y[1419]	V_hb_outlet_3	36.238	mL
y[1420]	V_hduct_3	0.479	mL	dydt[1420] = Iw_hbile
y[1421]	V_gbd_3	20.0031	mL	dydt[1421] = -Iw_gbd_abs
y[1422]	V_bduct_3	0.3832	mL
y[1423]	V_gbd_empty_3	0.192063	mL
y[1424]	V_gbd_refill_3	0.287863	mL
y[1425]	V_rb_glm_3	5	mL
y[1426]	V_rb1_3	4.69996	mL	dydt[1426] = kw_r_px*V_ru1_3
y[1427]	V_rb2_3	4.75958	mL	dydt[1427] = np.sum(kw_r_hd*y[1433:1438])
y[1428]	V_rb3_3	4.77215	mL	dydt[1428] = np.sum(kw_r_ha*y[1438:1445])
y[1429]	V_rb4_3	4.78541	mL	dydt[1429] = np.sum(kw_r_ds*y[1445:1449])
y[1430]	V_rb5_3	4.9092	mL	dydt[1430] = np.sum(kw_r_cd*(V_if_base/V_if_3)**2.5*y[1449:1471])
y[1431]	V_ru0_3	9	mL
y[1432]	V_ru1_3	3.52963	mL	dydt[1432] = -kw_r_px*V_ru1_3
y[1433]	V_ru2_3	3.13468	mL	dydt[1433:1438] = -kw_r_hd*y[1433:1438]
y[1434]	V_ru3_3	2.93102	mL	dydt[1438:1445] = -kw_r_ha*y[1438:1445]
y[1435]	V_ru4_3	2.73985	mL	dydt[1445:1449] = -kw_r_ds*y[1445:1449]
y[1436]	V_ru5_3	2.56144	mL	dydt[1449:1471] = -kw_r_cd*(V_if_base/V_if_3)**2.5*y[1449:1471]
y[1437]	V_ru6_3	2.39534	mL
y[1438]	V_ru7_3	2.38567	mL
y[1439]	V_ru8_3	2.3839	mL
y[1440]	V_ru9_3	2.38244	mL
y[1441]	V_ru10_3	2.38149	mL
y[1442]	V_ru11_3	2.3799	mL
y[1443]	V_ru12_3	2.37844	mL
y[1444]	V_ru13_3	2.37699	mL
y[1445]	V_ru14_3	2.37506	mL
y[1446]	V_ru15_3	2.37245	mL
y[1447]	V_ru16_3	2.37029	mL
y[1448]	V_ru17_3	2.36768	mL
y[1449]	V_ru18_3	1.81879	mL
y[1450]	V_ru19_3	1.37712	mL
y[1451]	V_ru20_3	1.04254	mL
y[1452]	V_ru21_3	0.789361	mL
y[1453]	V_ru22_3	0.597666	mL
y[1454]	V_ru23_3	0.452524	mL
y[1455]	V_ru24_3	0.342677	mL
y[1456]	V_ru25_3	0.259448	mL
y[1457]	V_ru26_3	0.196448	mL
y[1458]	V_ru27_3	0.148763	mL
y[1459]	V_ru28_3	0.112667	mL
y[1460]	V_ru29_3	0.0852935	mL
y[1461]	V_ru30_3	0.0645904	mL
y[1462]	V_ru31_3	0.0489284	mL
y[1463]	V_ru32_3	0.0370483	mL
y[1464]	V_ru33_3	0.0280568	mL
y[1465]	V_ru34_3	0.0212494	mL
y[1466]	V_ru35_3	0.016095	mL
y[1467]	V_ru36_3	0.0121888	mL
y[1468]	V_ru37_3	0.00923187	mL
y[1469]	V_ru38_3	0.00699216	mL
y[1470]	V_ru39_3	0.00529584	mL
y[1471]	V_ubd_3	33.2122	mL
y[1472]	V_urinated_3	0	mL
y[1473]	V_gb_ma_3	39.6	mL
y[1474]	V_gb1_3	0.941353	mL	dydt[1474] = -Iw_stm
y[1475]	V_gb2_3	1.01538	mL
y[1476]	V_gb3_3	1.04408	mL	dydt[1476:1506] = (pi_cop - P_cap - (n_eff_min+y[1550:1580]/MWeff)*(R_gas*T_body)/y[1513:1543])/Rw_small
y[1477]	V_gb4_3	1.04332	mL
y[1478]	V_gb5_3	1.03286	mL
y[1479]	V_gb6_3	1.01538	mL
y[1480]	V_gb7_3	1.01538	mL
y[1481]	V_gb8_3	1.01538	mL
y[1482]	V_gb9_3	1.01538	mL
y[1483]	V_gb10_3	1.01538	mL
y[1484]	V_gb11_3	1.01538	mL
y[1485]	V_gb12_3	1.01538	mL
y[1486]	V_gb13_3	1.01538	mL
y[1487]	V_gb14_3	1.01538	mL
y[1488]	V_gb15_3	1.01538	mL
y[1489]	V_gb16_3	1.01538	mL
y[1490]	V_gb17_3	1.01538	mL
y[1491]	V_gb18_3	1.01538	mL
y[1492]	V_gb19_3	1.01538	mL
y[1493]	V_gb20_3	1.01538	mL
y[1494]	V_gb21_3	1.01538	mL
y[1495]	V_gb22_3	1.01538	mL
y[1496]	V_gb23_3	1.01538	mL
y[1497]	V_gb24_3	1.01538	mL
y[1498]	V_gb25_3	1.01538	mL
y[1499]	V_gb26_3	1.01538	mL
y[1500]	V_gb27_3	1.01538	mL
y[1501]	V_gb28_3	1.01538	mL
y[1502]	V_gb29_3	1.01538	mL
y[1503]	V_gb30_3	1.01538	mL
y[1504]	V_gb31_3	1.01538	mL
y[1505]	V_gb32_3	1.01538	mL
y[1506]	V_gb33_3	0.763227	mL	dydt[1506] = Iw_large * (V_gf33_3/(V_gf33_3+W_gr33_3)/0.75 - 1) if W_gr33_3 > 0 else 0
y[1507]	V_gb34_3	1.2701	mL	dydt[1507] = Iw_large * (V_gf34_3/(V_gf34_3+W_gr34_3)/0.75 - 1) if W_gr34_3 > 0 else 0
y[1508]	V_gb35_3	1.26934	mL	dydt[1508] = Iw_large * (V_gf35_3/(V_gf35_3+W_gr35_3)/0.75 - 1) if W_gr35_3 > 0 else 0
y[1509]	V_gb36_3	3.04615	mL	dydt[1509] = Iw_large * (V_gf36_3/(V_gf36_3+W_gr36_3)/0.75 - 1) if W_gr36_3 > 0 else 0
y[1510]	V_gb37_3	0.761538	mL	dydt[1510] = Iw_large * (V_gf37_3/(V_gf37_3+W_gr37_3)/0.75 - 1) if W_gr37_3 > 0 else 0
y[1511]	V_gf1_3	24.6279	mL	dydt[1511] = Iw_stm
y[1512]	V_gf2_3	15.4082	mL
y[1513]	V_gf3_3	9.53772	mL	dydt[1513:1543] = -(pi_cop - P_cap - (n_eff_min+y[1550:1580]/MWeff)*(R_gas*T_body)/y[1513:1543])/Rw_small
y[1514]	V_gf4_3	4.86462	mL
y[1515]	V_gf5_3	0.63152	mL
y[1516]	V_gf6_3	0.266298	mL
y[1517]	V_gf7_3	0.272032	mL
y[1518]	V_gf8_3	0.277765	mL
y[1519]	V_gf9_3	0.283499	mL
y[1520]	V_gf10_3	0.289232	mL
y[1521]	V_gf11_3	0.294965	mL
y[1522]	V_gf12_3	0.300698	mL
y[1523]	V_gf13_3	0.306432	mL
y[1524]	V_gf14_3	0.312165	mL
y[1525]	V_gf15_3	0.317898	mL
y[1526]	V_gf16_3	0.323632	mL
y[1527]	V_gf17_3	0.329365	mL
y[1528]	V_gf18_3	0.335098	mL
y[1529]	V_gf19_3	0.340831	mL
y[1530]	V_gf20_3	0.346565	mL
y[1531]	V_gf21_3	0.352298	mL
y[1532]	V_gf22_3	0.358031	mL
y[1533]	V_gf23_3	0.363765	mL
y[1534]	V_gf24_3	0.369498	mL
y[1535]	V_gf25_3	0.375231	mL
y[1536]	V_gf26_3	0.380964	mL
y[1537]	V_gf27_3	0.386698	mL
y[1538]	V_gf28_3	0.392431	mL
y[1539]	V_gf29_3	0.398164	mL
y[1540]	V_gf30_3	0.403898	mL
y[1541]	V_gf31_3	0.409631	mL
y[1542]	V_gf32_3	0.415364	mL
y[1543]	V_gf33_3	5.84363	mL	dydt[1543] = -Iw_large * (V_gf33_3/(V_gf33_3+W_gr33_3)/0.75 - 1) if W_gr33_3 > 0 else 0
y[1544]	V_gf34_3	49.1307	mL	dydt[1544] = -Iw_large * (V_gf34_3/(V_gf34_3+W_gr34_3)/0.75 - 1) if W_gr34_3 > 0 else 0
y[1545]	V_gf35_3	45.0314	mL	dydt[1545] = -Iw_large * (V_gf35_3/(V_gf35_3+W_gr35_3)/0.75 - 1) if W_gr35_3 > 0 else 0
y[1546]	V_gf36_3	0.449843	mL	dydt[1546] = -Iw_large * (V_gf36_3/(V_gf36_3+W_gr36_3)/0.75 - 1) if W_gr36_3 > 0 else 0
y[1547]	V_gf37_3	1.38319	mL	dydt[1547] = -Iw_large * (V_gf37_3/(V_gf37_3+W_gr37_3)/0.75 - 1) if W_gr37_3 > 0 else 0
y[1548]	V_gf_def_3	0	mL
y[1549]	W_gr1_3	2.07314e-28	g
y[1550]	W_gr2_3	1.55627e-28	g
y[1551]	W_gr3_3	2.58115e-28	g
y[1552]	W_gr4_3	0.000687135	g
y[1553]	W_gr5_3	0.0013381	g
y[1554]	W_gr6_3	0.00199098	g
y[1555]	W_gr7_3	0.00264375	g
y[1556]	W_gr8_3	0.00329653	g
y[1557]	W_gr9_3	0.00394931	g
y[1558]	W_gr10_3	0.00460208	g
y[1559]	W_gr11_3	0.00525486	g
y[1560]	W_gr12_3	0.00590764	g
y[1561]	W_gr13_3	0.00656042	g
y[1562]	W_gr14_3	0.00721319	g
y[1563]	W_gr15_3	0.00786597	g
y[1564]	W_gr16_3	0.00851875	g
y[1565]	W_gr17_3	0.00917153	g
y[1566]	W_gr18_3	0.00982431	g
y[1567]	W_gr19_3	0.0104771	g
y[1568]	W_gr20_3	0.0111299	g
y[1569]	W_gr21_3	0.0117826	g
y[1570]	W_gr22_3	0.0124354	g
y[1571]	W_gr23_3	0.0130882	g
y[1572]	W_gr24_3	0.013741	g
y[1573]	W_gr25_3	0.0143938	g
y[1574]	W_gr26_3	0.0150465	g
y[1575]	W_gr27_3	0.0156993	g
y[1576]	W_gr28_3	0.0163521	g
y[1577]	W_gr29_3	0.0170049	g
y[1578]	W_gr30_3	0.0176576	g
y[1579]	W_gr31_3	0.0183104	g
y[1580]	W_gr32_3	0.0189632	g
y[1581]	W_gr33_3	1.59908	g
y[1582]	W_gr34_3	14.8262	g
y[1583]	W_gr35_3	14.8262	g
y[1584]	W_gr36_3	0	g
y[1585]	W_gr37_3	0	g
y[1586]	W_gr_def_3	0	g
y[1587]	V_total_3	0	nmol
y[1588]	X_vein_3	0	nmol
y[1589]	X_rheart_3	0	nmol
y[1590]	X_pb1_3	0	nmol
y[1591]	X_pb2_3	0	nmol
y[1592]	X_pb3_3	0	nmol
y[1593]	X_pb4_3	0	nmol
y[1594]	X_lheart_3	0	nmol
y[1595]	X_artery_3	0	nmol
y[1596]	X_other_3	0	nmol
y[1597]	X_if_3	0	nmol
y[1598]	X_pv_3	0	nmol
y[1599]	X_hb_inlet_3	0	nmol
y[1600]	X_fhb1_3	0	nmol	dydt[1600:1605] = -fu_b_msz*PSh_sin_inf_msz/5*y[1600:1605]/(y[1414:1419]+V_hi/5) + fu_h_msz*PSh_sin_eff_msz/5*y[1735:1740]/(V_hc/5)
y[1601]	X_fhb2_3	0	nmol
y[1602]	X_fhb3_3	0	nmol
y[1603]	X_fhb4_3	0	nmol
y[1604]	X_fhb5_3	0	nmol
y[1605]	X_hb_outlet_3	0	nmol
y[1606]	X_hduct_3	0	nmol	dydt[1606] = np.sum(fu_h_msz*PSh_bile_eff_msz/5*y[1735:1740]/(V_hc/5))
y[1607]	X_gbd_3	0	nmol
y[1608]	X_bduct_3	0	nmol
y[1609]	X_gbd_empty_3	0	nmol
y[1610]	X_gbd_refill_3	0	nmol
y[1611]	X_rb_glm_3	0	nmol
y[1612]	X_rb1_3	0	nmol	dydt[1612] = -fu_b_msz*PSrb_inf_msz/5*X_rb1_3/V_rb1_3 + fu_r_msz*PSrb_eff_msz/5*X_rc1_3/V_rc1
y[1613]	X_rb2_3	0	nmol	dydt[1613] = -fu_b_msz*PSrb_inf_msz/5*X_rb2_3/V_rb2_3 + fu_r_msz*PSrb_eff_msz/5*X_rc2_3/V_rc2
y[1614]	X_rb3_3	0	nmol	dydt[1614] = -fu_b_msz*PSrb_inf_msz/5*X_rb3_3/V_rb3_3 + fu_r_msz*PSrb_eff_msz/5*X_rc3_3/V_rc3
y[1615]	X_rb4_3	0	nmol	dydt[1615] = -fu_b_msz*PSrb_inf_msz/5*X_rb4_3/V_rb4_3 + fu_r_msz*PSrb_eff_msz/5*X_rc4_3/V_rc4
y[1616]	X_rb5_3	0	nmol	dydt[1616] = -fu_b_msz*PSrb_inf_msz/5*X_rb5_3/V_rb5_3 + fu_r_msz*PSrb_eff_msz/5*X_rc5_3/V_rc5
y[1617]	X_ru0_3	0	nmol
y[1618]	X_ru1_3	0	nmol	dydt[1618] = -PSru_inf_msz/5*X_ru1_3/V_ru1_3 + fu_r_msz*PSru_eff_msz/5*X_rc1_3/V_rc1
y[1619]	X_ru2_3	0	nmol	dydt[1619:1624] = (-PSru_inf_msz/5*y[1619:1624]/y[1433:1438] + fu_r_msz*PSru_eff_msz/5*X_rc2_3/V_rc2)*y[1433:1438]/np.sum(y[1433:1438])
y[1620]	X_ru3_3	0	nmol	dydt[1624:1631] = (-PSru_inf_msz/5*y[1624:1631]/y[1438:1445] + fu_r_msz*PSru_eff_msz/5*X_rc3_3/V_rc3)*y[1438:1445]/np.sum(y[1438:1445])
y[1621]	X_ru4_3	0	nmol	dydt[1631:1635] = (-PSru_inf_msz/5*y[1631:1635]/y[1445:1449] + fu_r_msz*PSru_eff_msz/5*X_rc4_3/V_rc4)*y[1445:1449]/np.sum(y[1445:1449])
y[1622]	X_ru5_3	0	nmol	dydt[1635:1657] = (-PSru_inf_msz/5*y[1635:1657]/y[1449:1471] + fu_r_msz*PSru_eff_msz/5*X_rc5_3/V_rc5)*y[1449:1471]/np.sum(y[1449:1471])
y[1623]	X_ru6_3	0	nmol
y[1624]	X_ru7_3	0	nmol
y[1625]	X_ru8_3	0	nmol
y[1626]	X_ru9_3	0	nmol
y[1627]	X_ru10_3	0	nmol
y[1628]	X_ru11_3	0	nmol
y[1629]	X_ru12_3	0	nmol
y[1630]	X_ru13_3	0	nmol
y[1631]	X_ru14_3	0	nmol
y[1632]	X_ru15_3	0	nmol
y[1633]	X_ru16_3	0	nmol
y[1634]	X_ru17_3	0	nmol
y[1635]	X_ru18_3	0	nmol
y[1636]	X_ru19_3	0	nmol
y[1637]	X_ru20_3	0	nmol
y[1638]	X_ru21_3	0	nmol
y[1639]	X_ru22_3	0	nmol
y[1640]	X_ru23_3	0	nmol
y[1641]	X_ru24_3	0	nmol
y[1642]	X_ru25_3	0	nmol
y[1643]	X_ru26_3	0	nmol
y[1644]	X_ru27_3	0	nmol
y[1645]	X_ru28_3	0	nmol
y[1646]	X_ru29_3	0	nmol
y[1647]	X_ru30_3	0	nmol
y[1648]	X_ru31_3	0	nmol
y[1649]	X_ru32_3	0	nmol
y[1650]	X_ru33_3	0	nmol
y[1651]	X_ru34_3	0	nmol
y[1652]	X_ru35_3	0	nmol
y[1653]	X_ru36_3	0	nmol
y[1654]	X_ru37_3	0	nmol
y[1655]	X_ru38_3	0	nmol
y[1656]	X_ru39_3	0	nmol
y[1657]	X_ubd_3	0	nmol
y[1658]	X_urinated_3	0	nmol
y[1659]	X_gb_ma_3	0	nmol
y[1660]	X_gb1_3	0	nmol
y[1661]	X_gb2_3	0	nmol	dydt[1661:1692] = fu_e_msz*Pgb_eff_msz*S_dji*y[1746:1777]/(L_dji/L_gtotal*V_gc) - fu_b_msz*Pgb_inf_msz*S_dji*y[1661:1692]/y[1475:1506]
y[1662]	X_gb3_3	0	nmol	dydt[1692] = fu_e_msz*Pgb_eff_msz*S_asc*X_gc33_3/(L_asc/L_gtotal*V_gc) - fu_b_msz*Pgb_inf_msz*S_asc*X_gb33_3/V_gb33_3
y[1663]	X_gb4_3	0	nmol	dydt[1693] = fu_e_msz*Pgb_eff_msz*S_tsc*X_gc34_3/(L_tsc/L_gtotal*V_gc) - fu_b_msz*Pgb_inf_msz*S_tsc*X_gb34_3/V_gb34_3
y[1664]	X_gb5_3	0	nmol	dydt[1694] = fu_e_msz*Pgb_eff_msz*S_tsc*X_gc35_3/(L_tsc/L_gtotal*V_gc) - fu_b_msz*Pgb_inf_msz*S_tsc*X_gb35_3/V_gb35_3
y[1665]	X_gb6_3	0	nmol	dydt[1695] = fu_e_msz*Pgb_eff_msz*S_dsc*X_gc36_3/(L_dsc/L_gtotal*V_gc) - fu_b_msz*Pgb_inf_msz*S_dsc*X_gb36_3/V_gb36_3
y[1666]	X_gb7_3	0	nmol	dydt[1696] = fu_e_msz*Pgb_eff_msz*S_rec*X_gc37_3/(L_rec/L_gtotal*V_gc) - fu_b_msz*Pgb_inf_msz*S_rec*X_gb37_3/V_gb37_3
y[1667]	X_gb8_3	0	nmol
y[1668]	X_gb9_3	0	nmol
y[1669]	X_gb10_3	0	nmol
y[1670]	X_gb11_3	0	nmol
y[1671]	X_gb12_3	0	nmol
y[1672]	X_gb13_3	0	nmol
y[1673]	X_gb14_3	0	nmol
y[1674]	X_gb15_3	0	nmol
y[1675]	X_gb16_3	0	nmol
y[1676]	X_gb17_3	0	nmol
y[1677]	X_gb18_3	0	nmol
y[1678]	X_gb19_3	0	nmol
y[1679]	X_gb20_3	0	nmol
y[1680]	X_gb21_3	0	nmol
y[1681]	X_gb22_3	0	nmol
y[1682]	X_gb23_3	0	nmol
y[1683]	X_gb24_3	0	nmol
y[1684]	X_gb25_3	0	nmol
y[1685]	X_gb26_3	0	nmol
y[1686]	X_gb27_3	0	nmol
y[1687]	X_gb28_3	0	nmol
y[1688]	X_gb29_3	0	nmol
y[1689]	X_gb30_3	0	nmol
y[1690]	X_gb31_3	0	nmol
y[1691]	X_gb32_3	0	nmol
y[1692]	X_gb33_3	0	nmol
y[1693]	X_gb34_3	0	nmol
y[1694]	X_gb35_3	0	nmol
y[1695]	X_gb36_3	0	nmol
y[1696]	X_gb37_3	0	nmol
y[1697]	X_gf1_3	0	nmol
y[1698]	X_gf2_3	0	nmol	dydt[1698:1729] = fu_e_msz*Pgf_eff_msz*S_dji*y[1746:1777]/(L_dji/L_gtotal*V_gc) - y[1512:1543]/(y[1512:1543]+y[1550:1581])*Pgf_inf_msz*S_dji*y[1698:1729]/y[1512:1543] + k_dissol_n_apriso*y[1783:1814]
y[1699]	X_gf3_3	0	nmol	dydt[1729] = fu_e_msz*Pgf_eff_msz*S_asc*X_gc33_3/(L_asc/L_gtotal*V_gc) - V_gf33_3/(V_gf33_3+W_gr33_3)*Pgf_inf_msz*S_asc*X_gf33_3/V_gf33_3 + k_dissol_n_apriso*X_gp33_3
y[1700]	X_gf4_3	0	nmol	dydt[1730] = fu_e_msz*Pgf_eff_msz*S_tsc*X_gc34_3/(L_tsc/L_gtotal*V_gc) - V_gf34_3/(V_gf34_3+W_gr34_3)*Pgf_inf_msz*S_tsc*X_gf34_3/V_gf34_3 + k_dissol_n_apriso*X_gp34_3 - ka_fece*X_gf34_3
y[1701]	X_gf5_3	0	nmol	dydt[1731] = fu_e_msz*Pgf_eff_msz*S_tsc*X_gc35_3/(L_tsc/L_gtotal*V_gc) - V_gf35_3/(V_gf35_3+W_gr35_3)*Pgf_inf_msz*S_tsc*X_gf35_3/V_gf35_3 + k_dissol_n_apriso*X_gp35_3 - ka_fece*X_gf35_3
y[1702]	X_gf6_3	0	nmol	dydt[1732] = fu_e_msz*Pgf_eff_msz*S_dsc*X_gc36_3/(L_dsc/L_gtotal*V_gc) - V_gf36_3/(V_gf36_3+W_gr36_3)*Pgf_inf_msz*S_dsc*X_gf36_3/V_gf36_3 + k_dissol_n_apriso*X_gp36_3 - ka_fece*X_gf36_3
y[1703]	X_gf7_3	0	nmol	dydt[1733] = fu_e_msz*Pgf_eff_msz*S_rec*X_gc37_3/(L_rec/L_gtotal*V_gc) - V_gf37_3/(V_gf37_3+W_gr37_3)*Pgf_inf_msz*S_rec*X_gf37_3/V_gf37_3 + k_dissol_n_apriso*X_gp37_3 - ka_fece*X_gf37_3
y[1704]	X_gf8_3	0	nmol
y[1705]	X_gf9_3	0	nmol
y[1706]	X_gf10_3	0	nmol
y[1707]	X_gf11_3	0	nmol
y[1708]	X_gf12_3	0	nmol
y[1709]	X_gf13_3	0	nmol
y[1710]	X_gf14_3	0	nmol
y[1711]	X_gf15_3	0	nmol
y[1712]	X_gf16_3	0	nmol
y[1713]	X_gf17_3	0	nmol
y[1714]	X_gf18_3	0	nmol
y[1715]	X_gf19_3	0	nmol
y[1716]	X_gf20_3	0	nmol
y[1717]	X_gf21_3	0	nmol
y[1718]	X_gf22_3	0	nmol
y[1719]	X_gf23_3	0	nmol
y[1720]	X_gf24_3	0	nmol
y[1721]	X_gf25_3	0	nmol
y[1722]	X_gf26_3	0	nmol
y[1723]	X_gf27_3	0	nmol
y[1724]	X_gf28_3	0	nmol
y[1725]	X_gf29_3	0	nmol
y[1726]	X_gf30_3	0	nmol
y[1727]	X_gf31_3	0	nmol
y[1728]	X_gf32_3	0	nmol
y[1729]	X_gf33_3	0	nmol
y[1730]	X_gf34_3	0	nmol
y[1731]	X_gf35_3	0	nmol
y[1732]	X_gf36_3	0	nmol
y[1733]	X_gf37_3	0	nmol
y[1734]	X_gf_def_3	0	nmol
y[1735]	X_hc1_3	0	nmol	dydt[1735:1740] = fu_b_msz*PSh_sin_inf_msz/5*y[1600:1605]/(y[1414:1419]+V_hi/5) - fu_h_msz*PSh_sin_eff_msz/5*y[1735:1740]/(V_hc/5) - fu_h_msz*PSh_bile_eff_msz/5*y[1735:1740]/(V_hc/5) - fu_h_msz*CLh_met_msz/5*y[1735:1740]/(V_hc/5)
y[1736]	X_hc2_3	0	nmol
y[1737]	X_hc3_3	0	nmol
y[1738]	X_hc4_3	0	nmol
y[1739]	X_hc5_3	0	nmol
y[1740]	X_rc1_3	0	nmol	dydt[1740] = fu_b_msz*PSrb_inf_msz/5*X_rb1_3/V_rb1_3 - fu_r_msz*PSrb_eff_msz/5*X_rc1_3/V_rc1 + PSru_inf_msz/5*X_ru1_3/V_ru1_3 - fu_r_msz*PSru_eff_msz/5*X_rc1_3/V_rc1
y[1741]	X_rc2_3	0	nmol	dydt[1741] = fu_b_msz*PSrb_inf_msz/5*X_rb2_3/V_rb2_3 - fu_r_msz*PSrb_eff_msz/5*X_rc2_3/V_rc2 + np.sum(PSru_inf_msz/5*y[1433:1438]/np.sum(y[1433:1438])*y[1619:1624]/y[1433:1438]) - fu_r_msz*PSru_eff_msz/5*X_rc2_3/V_rc2
y[1742]	X_rc3_3	0	nmol	dydt[1742] = fu_b_msz*PSrb_inf_msz/5*X_rb3_3/V_rb3_3 - fu_r_msz*PSrb_eff_msz/5*X_rc3_3/V_rc3 + np.sum(PSru_inf_msz/5*y[1438:1445]/np.sum(y[1438:1445])*y[1624:1631]/y[1438:1445]) - fu_r_msz*PSru_eff_msz/5*X_rc3_3/V_rc3
y[1743]	X_rc4_3	0	nmol	dydt[1743] = fu_b_msz*PSrb_inf_msz/5*X_rb4_3/V_rb4_3 - fu_r_msz*PSrb_eff_msz/5*X_rc4_3/V_rc4 + np.sum(PSru_inf_msz/5*y[1445:1449]/np.sum(y[1445:1449])*y[1631:1635]/y[1445:1449]) - fu_r_msz*PSru_eff_msz/5*X_rc4_3/V_rc4
y[1744]	X_rc5_3	0	nmol	dydt[1744] = fu_b_msz*PSrb_inf_msz/5*X_rb5_3/V_rb5_3 - fu_r_msz*PSrb_eff_msz/5*X_rc5_3/V_rc5 + np.sum(PSru_inf_msz/5*y[1449:1471]/np.sum(y[1449:1471])*y[1635:1657]/y[1449:1471]) - fu_r_msz*PSru_eff_msz/5*X_rc5_3/V_rc5
y[1745]	X_gc1_3	0	nmol
y[1746]	X_gc2_3	0	nmol	dydt[1746:1777] = -fu_e_msz*Pgb_eff_msz*S_dji*y[1746:1777]/(L_dji/L_gtotal*V_gc) + fu_b_msz*Pgb_inf_msz*S_dji*y[1661:1692]/y[1475:1506] - fu_e_msz*Pgf_eff_msz*S_dji*y[1746:1777]/(L_dji/L_gtotal*V_gc) + y[1512:1543]/(y[1512:1543]+y[1550:1581])*Pgf_inf_msz*S_dji*y[1698:1729]/y[1512:1543] - fu_e_msz*CLg_met_msz*y[1746:1777]/V_gc
y[1747]	X_gc3_3	0	nmol	dydt[1777] = -fu_e_msz*Pgb_eff_msz*S_asc*X_gc33_3/(L_asc/L_gtotal*V_gc) + fu_b_msz*Pgb_inf_msz*S_asc*X_gb33_3/V_gb33_3 - fu_e_msz*Pgf_eff_msz*S_asc*X_gc33_3/(L_asc/L_gtotal*V_gc) + V_gf33_3/(V_gf33_3+W_gr33_3)*Pgf_inf_msz*S_asc*X_gf33_3/V_gf33_3 - fu_e_msz*CLg_met_msz*X_gc33_3/V_gc
y[1748]	X_gc4_3	0	nmol	dydt[1778] = -fu_e_msz*Pgb_eff_msz*S_tsc*X_gc34_3/(L_tsc/L_gtotal*V_gc) + fu_b_msz*Pgb_inf_msz*S_tsc*X_gb34_3/V_gb34_3 - fu_e_msz*Pgf_eff_msz*S_tsc*X_gc34_3/(L_tsc/L_gtotal*V_gc) + V_gf34_3/(V_gf34_3+W_gr34_3)*Pgf_inf_msz*S_tsc*X_gf34_3/V_gf34_3 - fu_e_msz*CLg_met_msz*X_gc34_3/V_gc
y[1749]	X_gc5_3	0	nmol	dydt[1779] = -fu_e_msz*Pgb_eff_msz*S_tsc*X_gc35_3/(L_tsc/L_gtotal*V_gc) + fu_b_msz*Pgb_inf_msz*S_tsc*X_gb35_3/V_gb35_3 - fu_e_msz*Pgf_eff_msz*S_tsc*X_gc35_3/(L_tsc/L_gtotal*V_gc) + V_gf35_3/(V_gf35_3+W_gr35_3)*Pgf_inf_msz*S_tsc*X_gf35_3/V_gf35_3 - fu_e_msz*CLg_met_msz*X_gc35_3/V_gc
y[1750]	X_gc6_3	0	nmol	dydt[1780] = -fu_e_msz*Pgb_eff_msz*S_dsc*X_gc36_3/(L_dsc/L_gtotal*V_gc) + fu_b_msz*Pgb_inf_msz*S_dsc*X_gb36_3/V_gb36_3 - fu_e_msz*Pgf_eff_msz*S_dsc*X_gc36_3/(L_dsc/L_gtotal*V_gc) + V_gf36_3/(V_gf36_3+W_gr36_3)*Pgf_inf_msz*S_dsc*X_gf36_3/V_gf36_3 - fu_e_msz*CLg_met_msz*X_gc36_3/V_gc
y[1751]	X_gc7_3	0	nmol	dydt[1781] = -fu_e_msz*Pgb_eff_msz*S_rec*X_gc37_3/(L_rec/L_gtotal*V_gc) + fu_b_msz*Pgb_inf_msz*S_rec*X_gb37_3/V_gb37_3 - fu_e_msz*Pgf_eff_msz*S_rec*X_gc37_3/(L_rec/L_gtotal*V_gc) + V_gf37_3/(V_gf37_3+W_gr37_3)*Pgf_inf_msz*S_rec*X_gf37_3/V_gf37_3 - fu_e_msz*CLg_met_msz*X_gc37_3/V_gc
y[1752]	X_gc8_3	0	nmol
y[1753]	X_gc9_3	0	nmol
y[1754]	X_gc10_3	0	nmol
y[1755]	X_gc11_3	0	nmol
y[1756]	X_gc12_3	0	nmol
y[1757]	X_gc13_3	0	nmol
y[1758]	X_gc14_3	0	nmol
y[1759]	X_gc15_3	0	nmol
y[1760]	X_gc16_3	0	nmol
y[1761]	X_gc17_3	0	nmol
y[1762]	X_gc18_3	0	nmol
y[1763]	X_gc19_3	0	nmol
y[1764]	X_gc20_3	0	nmol
y[1765]	X_gc21_3	0	nmol
y[1766]	X_gc22_3	0	nmol
y[1767]	X_gc23_3	0	nmol
y[1768]	X_gc24_3	0	nmol
y[1769]	X_gc25_3	0	nmol
y[1770]	X_gc26_3	0	nmol
y[1771]	X_gc27_3	0	nmol
y[1772]	X_gc28_3	0	nmol
y[1773]	X_gc29_3	0	nmol
y[1774]	X_gc30_3	0	nmol
y[1775]	X_gc31_3	0	nmol
y[1776]	X_gc32_3	0	nmol
y[1777]	X_gc33_3	0	nmol
y[1778]	X_gc34_3	0	nmol
y[1779]	X_gc35_3	0	nmol
y[1780]	X_gc36_3	0	nmol
y[1781]	X_gc37_3	0	nmol
y[1782]	X_gp1_3	0	nmol	dydt[1782] = k_disint_capsule*X_gs1_3
y[1783]	X_gp2_3	0	nmol	dydt[1783:1815] = k_disint_capsule*y[1821:1853] - k_dissol_n_apriso*y[1783:1815]
y[1784]	X_gp3_3	0	nmol	dydt[1815] = - k_dissol_n_apriso*X_gp34_3 - ka_fece*X_gp34_3
y[1785]	X_gp4_3	0	nmol	dydt[1816] = - k_dissol_n_apriso*X_gp35_3 - ka_fece*X_gp35_3
y[1786]	X_gp5_3	0	nmol	dydt[1817] = - k_dissol_n_apriso*X_gp36_3 - ka_fece*X_gp36_3
y[1787]	X_gp6_3	0	nmol	dydt[1818] = - k_dissol_n_apriso*X_gp37_3 - ka_fece*X_gp37_3
y[1788]	X_gp7_3	0	nmol
y[1789]	X_gp8_3	0	nmol
y[1790]	X_gp9_3	0	nmol
y[1791]	X_gp10_3	0	nmol
y[1792]	X_gp11_3	0	nmol
y[1793]	X_gp12_3	0	nmol
y[1794]	X_gp13_3	0	nmol
y[1795]	X_gp14_3	0	nmol
y[1796]	X_gp15_3	0	nmol
y[1797]	X_gp16_3	0	nmol
y[1798]	X_gp17_3	0	nmol
y[1799]	X_gp18_3	0	nmol
y[1800]	X_gp19_3	0	nmol
y[1801]	X_gp20_3	0	nmol
y[1802]	X_gp21_3	0	nmol
y[1803]	X_gp22_3	0	nmol
y[1804]	X_gp23_3	0	nmol
y[1805]	X_gp24_3	0	nmol
y[1806]	X_gp25_3	0	nmol
y[1807]	X_gp26_3	0	nmol
y[1808]	X_gp27_3	0	nmol
y[1809]	X_gp28_3	0	nmol
y[1810]	X_gp29_3	0	nmol
y[1811]	X_gp30_3	0	nmol
y[1812]	X_gp31_3	0	nmol
y[1813]	X_gp32_3	0	nmol
y[1814]	X_gp33_3	0	nmol
y[1815]	X_gp34_3	0	nmol
y[1816]	X_gp35_3	0	nmol
y[1817]	X_gp36_3	0	nmol
y[1818]	X_gp37_3	0	nmol
y[1819]	X_gp_def_3	0	nmol
y[1820]	X_gs1_3	0	nmol	dydt[1820] = -k_disint_capsule*X_gs1_3
y[1821]	X_gs2_3	0	nmol	dydt[1821:1853] = -k_disint_capsule*y[1821:1853]
y[1822]	X_gs3_3	0	nmol
y[1823]	X_gs4_3	0	nmol
y[1824]	X_gs5_3	0	nmol
y[1825]	X_gs6_3	0	nmol
y[1826]	X_gs7_3	0	nmol
y[1827]	X_gs8_3	0	nmol
y[1828]	X_gs9_3	0	nmol
y[1829]	X_gs10_3	0	nmol
y[1830]	X_gs11_3	0	nmol
y[1831]	X_gs12_3	0	nmol
y[1832]	X_gs13_3	0	nmol
y[1833]	X_gs14_3	0	nmol
y[1834]	X_gs15_3	0	nmol
y[1835]	X_gs16_3	0	nmol
y[1836]	X_gs17_3	0	nmol
y[1837]	X_gs18_3	0	nmol
y[1838]	X_gs19_3	0	nmol
y[1839]	X_gs20_3	0	nmol
y[1840]	X_gs21_3	0	nmol
y[1841]	X_gs22_3	0	nmol
y[1842]	X_gs23_3	0	nmol
y[1843]	X_gs24_3	0	nmol
y[1844]	X_gs25_3	0	nmol
y[1845]	X_gs26_3	0	nmol
y[1846]	X_gs27_3	0	nmol
y[1847]	X_gs28_3	0	nmol
y[1848]	X_gs29_3	0	nmol
y[1849]	X_gs30_3	0	nmol
y[1850]	X_gs31_3	0	nmol
y[1851]	X_gs32_3	0	nmol
y[1852]	X_gs33_3	0	nmol
y[1853]	X_gs34_3	0	nmol
y[1854]	X_gs35_3	0	nmol
y[1855]	X_gs36_3	0	nmol
y[1856]	X_gs37_3	0	nmol
y[1857]	X_gs_def_3	0	nmol
y[1858]	X_total_3	0	nmol
y[1859]	X_vein_3m	0	nmol
y[1860]	X_rheart_3m	0	nmol
y[1861]	X_pb1_3m	0	nmol
y[1862]	X_pb2_3m	0	nmol
y[1863]	X_pb3_3m	0	nmol
y[1864]	X_pb4_3m	0	nmol
y[1865]	X_lheart_3m	0	nmol
y[1866]	X_artery_3m	0	nmol
y[1867]	X_other_3m	0	nmol
y[1868]	X_if_3m	0	nmol
y[1869]	X_pv_3m	0	nmol
y[1870]	X_hb_inlet_3m	0	nmol
y[1871]	X_fhb1_3m	0	nmol	dydt[1871:1876] = -fu_b_met*PSh_sin_inf_met/5*y[1871:1876]/(y[1414:1419]+V_hi/5) + fu_h_met*PSh_sin_eff_met/5*y[2006:2011]/(V_hc/5)
y[1872]	X_fhb2_3m	0	nmol
y[1873]	X_fhb3_3m	0	nmol
y[1874]	X_fhb4_3m	0	nmol
y[1875]	X_fhb5_3m	0	nmol
y[1876]	X_hb_outlet_3m	0	nmol
y[1877]	X_hduct_3m	0	nmol	dydt[1877] = np.sum(fu_h_met*PSh_bile_eff_met/5*y[2006:2011]/(V_hc/5))
y[1878]	X_gbd_3m	0	nmol
y[1879]	X_bduct_3m	0	nmol
y[1880]	X_gbd_empty_3m	0	nmol
y[1881]	X_gbd_refill_3m	0	nmol
y[1882]	X_rb_glm_3m	0	nmol
y[1883]	X_rb1_3m	0	nmol	dydt[1883] = -fu_b_met*PSrb_inf_met/5*X_rb1_3m/V_rb1_3 + fu_r_met*PSrb_eff_met/5*X_rc1_3m/V_rc1
y[1884]	X_rb2_3m	0	nmol	dydt[1884] = -fu_b_met*PSrb_inf_met/5*X_rb2_3m/V_rb2_3 + fu_r_met*PSrb_eff_met/5*X_rc2_3m/V_rc2
y[1885]	X_rb3_3m	0	nmol	dydt[1885] = -fu_b_met*PSrb_inf_met/5*X_rb3_3m/V_rb3_3 + fu_r_met*PSrb_eff_met/5*X_rc3_3m/V_rc3
y[1886]	X_rb4_3m	0	nmol	dydt[1886] = -fu_b_met*PSrb_inf_met/5*X_rb4_3m/V_rb4_3 + fu_r_met*PSrb_eff_met/5*X_rc4_3m/V_rc4
y[1887]	X_rb5_3m	0	nmol	dydt[1887] = -fu_b_met*PSrb_inf_met/5*X_rb5_3m/V_rb5_3 + fu_r_met*PSrb_eff_met/5*X_rc5_3m/V_rc5
y[1888]	X_ru0_3m	0	nmol
y[1889]	X_ru1_3m	0	nmol	dydt[1889] = -PSru_inf_met/5*X_ru1_3m/V_ru1_3 + fu_r_met*PSru_eff_met/5*X_rc1_3m/V_rc1
y[1890]	X_ru2_3m	0	nmol	dydt[1890:1895] = (-PSru_inf_met/5*y[1890:1895]/y[1433:1438] + fu_r_met*PSru_eff_met/5*X_rc2_3m/V_rc2)*y[1433:1438]/np.sum(y[1433:1438])
y[1891]	X_ru3_3m	0	nmol	dydt[1895:1902] = (-PSru_inf_met/5*y[1895:1902]/y[1438:1445] + fu_r_met*PSru_eff_met/5*X_rc3_3m/V_rc3)*y[1438:1445]/np.sum(y[1438:1445])
y[1892]	X_ru4_3m	0	nmol	dydt[1902:1906] = (-PSru_inf_met/5*y[1902:1906]/y[1445:1449] + fu_r_met*PSru_eff_met/5*X_rc4_3m/V_rc4)*y[1445:1449]/np.sum(y[1445:1449])
y[1893]	X_ru5_3m	0	nmol	dydt[1906:1928] = (-PSru_inf_met/5*y[1906:1928]/y[1449:1471] + fu_r_met*PSru_eff_met/5*X_rc5_3m/V_rc5)*y[1449:1471]/np.sum(y[1449:1471])
y[1894]	X_ru6_3m	0	nmol
y[1895]	X_ru7_3m	0	nmol
y[1896]	X_ru8_3m	0	nmol
y[1897]	X_ru9_3m	0	nmol
y[1898]	X_ru10_3m	0	nmol
y[1899]	X_ru11_3m	0	nmol
y[1900]	X_ru12_3m	0	nmol
y[1901]	X_ru13_3m	0	nmol
y[1902]	X_ru14_3m	0	nmol
y[1903]	X_ru15_3m	0	nmol
y[1904]	X_ru16_3m	0	nmol
y[1905]	X_ru17_3m	0	nmol
y[1906]	X_ru18_3m	0	nmol
y[1907]	X_ru19_3m	0	nmol
y[1908]	X_ru20_3m	0	nmol
y[1909]	X_ru21_3m	0	nmol
y[1910]	X_ru22_3m	0	nmol
y[1911]	X_ru23_3m	0	nmol
y[1912]	X_ru24_3m	0	nmol
y[1913]	X_ru25_3m	0	nmol
y[1914]	X_ru26_3m	0	nmol
y[1915]	X_ru27_3m	0	nmol
y[1916]	X_ru28_3m	0	nmol
y[1917]	X_ru29_3m	0	nmol
y[1918]	X_ru30_3m	0	nmol
y[1919]	X_ru31_3m	0	nmol
y[1920]	X_ru32_3m	0	nmol
y[1921]	X_ru33_3m	0	nmol
y[1922]	X_ru34_3m	0	nmol
y[1923]	X_ru35_3m	0	nmol
y[1924]	X_ru36_3m	0	nmol
y[1925]	X_ru37_3m	0	nmol
y[1926]	X_ru38_3m	0	nmol
y[1927]	X_ru39_3m	0	nmol
y[1928]	X_ubd_3m	0	nmol
y[1929]	X_urinated_3m	0	nmol
y[1930]	X_gb_ma_3m	0	nmol
y[1931]	X_gb1_3m	0	nmol
y[1932]	X_gb2_3m	0	nmol	dydt[1932:1963] = fu_e_met*Pgb_eff_met*S_dji*y[2017:2048]/(L_dji/L_gtotal*V_gc) - fu_b_met*Pgb_inf_met*S_dji*y[1932:1963]/y[1475:1506]
y[1933]	X_gb3_3m	0	nmol	dydt[1963] = fu_e_met*Pgb_eff_met*S_asc*X_gc33_3m/(L_asc/L_gtotal*V_gc) - fu_b_met*Pgb_inf_met*S_asc*X_gb33_3m/V_gb33_3
y[1934]	X_gb4_3m	0	nmol	dydt[1964] = fu_e_met*Pgb_eff_met*S_tsc*X_gc34_3m/(L_tsc/L_gtotal*V_gc) - fu_b_met*Pgb_inf_met*S_tsc*X_gb34_3m/V_gb34_3
y[1935]	X_gb5_3m	0	nmol	dydt[1965] = fu_e_met*Pgb_eff_met*S_tsc*X_gc35_3m/(L_tsc/L_gtotal*V_gc) - fu_b_met*Pgb_inf_met*S_tsc*X_gb35_3m/V_gb35_3
y[1936]	X_gb6_3m	0	nmol	dydt[1966] = fu_e_met*Pgb_eff_met*S_dsc*X_gc36_3m/(L_dsc/L_gtotal*V_gc) - fu_b_met*Pgb_inf_met*S_dsc*X_gb36_3m/V_gb36_3
y[1937]	X_gb7_3m	0	nmol	dydt[1967] = fu_e_met*Pgb_eff_met*S_rec*X_gc37_3m/(L_rec/L_gtotal*V_gc) - fu_b_met*Pgb_inf_met*S_rec*X_gb37_3m/V_gb37_3
y[1938]	X_gb8_3m	0	nmol
y[1939]	X_gb9_3m	0	nmol
y[1940]	X_gb10_3m	0	nmol
y[1941]	X_gb11_3m	0	nmol
y[1942]	X_gb12_3m	0	nmol
y[1943]	X_gb13_3m	0	nmol
y[1944]	X_gb14_3m	0	nmol
y[1945]	X_gb15_3m	0	nmol
y[1946]	X_gb16_3m	0	nmol
y[1947]	X_gb17_3m	0	nmol
y[1948]	X_gb18_3m	0	nmol
y[1949]	X_gb19_3m	0	nmol
y[1950]	X_gb20_3m	0	nmol
y[1951]	X_gb21_3m	0	nmol
y[1952]	X_gb22_3m	0	nmol
y[1953]	X_gb23_3m	0	nmol
y[1954]	X_gb24_3m	0	nmol
y[1955]	X_gb25_3m	0	nmol
y[1956]	X_gb26_3m	0	nmol
y[1957]	X_gb27_3m	0	nmol
y[1958]	X_gb28_3m	0	nmol
y[1959]	X_gb29_3m	0	nmol
y[1960]	X_gb30_3m	0	nmol
y[1961]	X_gb31_3m	0	nmol
y[1962]	X_gb32_3m	0	nmol
y[1963]	X_gb33_3m	0	nmol
y[1964]	X_gb34_3m	0	nmol
y[1965]	X_gb35_3m	0	nmol
y[1966]	X_gb36_3m	0	nmol
y[1967]	X_gb37_3m	0	nmol
y[1968]	X_gf1_3m	0	nmol
y[1969]	X_gf2_3m	0	nmol	dydt[1969:2000] = fu_e_met*Pgf_eff_met*S_dji*y[2017:2048]/(L_dji/L_gtotal*V_gc) - y[1512:1543]/(y[1512:1543]+y[1550:1581])*Pgf_inf_met*S_dji*y[1969:2000]/y[1512:1543]
y[1970]	X_gf3_3m	0	nmol	dydt[2000] = fu_e_met*Pgf_eff_met*S_asc*X_gc33_3m/(L_asc/L_gtotal*V_gc) - V_gf33_3/(V_gf33_3+W_gr33_3)*Pgf_inf_met*S_asc*X_gf33_3m/V_gf33_3
y[1971]	X_gf4_3m	0	nmol	dydt[2001] = fu_e_met*Pgf_eff_met*S_tsc*X_gc34_3m/(L_tsc/L_gtotal*V_gc) - V_gf34_3/(V_gf34_3+W_gr34_3)*Pgf_inf_met*S_tsc*X_gf34_3m/V_gf34_3
y[1972]	X_gf5_3m	0	nmol	dydt[2002] = fu_e_met*Pgf_eff_met*S_tsc*X_gc35_3m/(L_tsc/L_gtotal*V_gc) - V_gf35_3/(V_gf35_3+W_gr35_3)*Pgf_inf_met*S_tsc*X_gf35_3m/V_gf35_3
y[1973]	X_gf6_3m	0	nmol	dydt[2003] = fu_e_met*Pgf_eff_met*S_dsc*X_gc36_3m/(L_dsc/L_gtotal*V_gc) - V_gf36_3/(V_gf36_3+W_gr36_3)*Pgf_inf_met*S_dsc*X_gf36_3m/V_gf36_3
y[1974]	X_gf7_3m	0	nmol	dydt[2004] = fu_e_met*Pgf_eff_met*S_rec*X_gc37_3m/(L_rec/L_gtotal*V_gc) - V_gf37_3/(V_gf37_3+W_gr37_3)*Pgf_inf_met*S_rec*X_gf37_3m/V_gf37_3
y[1975]	X_gf8_3m	0	nmol
y[1976]	X_gf9_3m	0	nmol
y[1977]	X_gf10_3m	0	nmol
y[1978]	X_gf11_3m	0	nmol
y[1979]	X_gf12_3m	0	nmol
y[1980]	X_gf13_3m	0	nmol
y[1981]	X_gf14_3m	0	nmol
y[1982]	X_gf15_3m	0	nmol
y[1983]	X_gf16_3m	0	nmol
y[1984]	X_gf17_3m	0	nmol
y[1985]	X_gf18_3m	0	nmol
y[1986]	X_gf19_3m	0	nmol
y[1987]	X_gf20_3m	0	nmol
y[1988]	X_gf21_3m	0	nmol
y[1989]	X_gf22_3m	0	nmol
y[1990]	X_gf23_3m	0	nmol
y[1991]	X_gf24_3m	0	nmol
y[1992]	X_gf25_3m	0	nmol
y[1993]	X_gf26_3m	0	nmol
y[1994]	X_gf27_3m	0	nmol
y[1995]	X_gf28_3m	0	nmol
y[1996]	X_gf29_3m	0	nmol
y[1997]	X_gf30_3m	0	nmol
y[1998]	X_gf31_3m	0	nmol
[truncated: 801 more rows]

## Sheet: B
Beat	Interval	Lag	Duration	Description
0	tau_cb	no_lag_time	endless	circulating blood flow
1	tau_hb	no_lag_time	endless	hepatic blood flow
2	tau_bile	no_lag_time	endless	bile flow
3	tau_ge	no_lag_time	endless	gastric emptying
4	tau_gt_dji	no_lag_time	endless	gut transit in jejunum and ileum
5	tau_gt_asc	no_lag_time	endless	gut transit in ascending colon
6	tau_gt_tsc	no_lag_time	endless	gut transit in transverse colon
7	tau_gt_dsc	lag_gt_dsc	endless	gut transit in descending and sigmoid colon
8	tau_gb	no_lag_time	endless	gut blood flow
9	tau_rb	no_lag_time	endless	renal blood flow
10	tau_ru	no_lag_time	endless	urinary flow through renal tubules
11	once_a_day	lag_meal1	endless	virtual daily life: breakfast at 07:00 (1380 min)
12	once_a_day	lag_meal2	endless	virtual daily life: lunch at 12:00 (240 min, 1680 min)
13	once_a_day	lag_meal3	endless	virtual daily life: dinner at 19:00 (660 min, 2100 min)
14	once_a_day	lag_drink1	endless	virtual daily life: water1 at 10:00 (120 min, 1560 min)
15	once_a_day	lag_drink2	endless	virtual daily life: water2 at 15:00 (420 min, 1860 min)
16	once_a_day	lag_drink3	endless	virtual daily life: water3 at 22:00 (840 min)
17	once_a_day	lag_urinate1	endless	virtual daily life: urination1 at 06:30 (1350 min)
18	once_a_day	lag_urinate2	endless	virtual daily life: urination2 at 13:00 (300 min)
19	once_a_day	lag_urinate3	endless	virtual daily life: urination3 at 17:00 (540 min)
20	once_a_day	lag_urinate4	endless	virtual daily life: urination4 at 20:00 (720 min)
21	once_a_day	lag_urinate5	endless	virtual daily life: urination5 at 23:00 (900 min)
22	once_a_day	lag_defecate	endless	virtual daily life: defecation at 6:30 (1350 min)
23	one_time	lag_print	no_duration	print parameters
24	tau_clock	no_lag_time	endless	print clock time
25	one_time	lag_sol_dose	no_duration	oral solution dose
26	one_time	lag_sol_snack	no_duration	solution study: snack at 12:00
27	one_time	lag_sol_meal	no_duration	solution study: meal at 18:00
28	one_time	lag_form_dose	no_duration	oral formulation dose
29	one_time	lag_form_snack	no_duration	formulation study: snack at 15:00
30	one_time	lag_form_meal	no_duration	formulation study: meal at 18:00

## Sheet: R
Beat	PRE	Sort	Description
0	delta_V_vein_1 += -V_cb_in + (V_other_1 - V_other_base)
0	delta_V_rheart_1 += -V_rheart_1 + V_cb_in
0	delta_V_pb1_1 += -V_pb1_1 + V_rheart_1
0	delta_V_pb2_1 += -V_pb2_1 + V_pb1_1
0	delta_V_pb3_1 += -V_pb3_1 + V_pb2_1
0	delta_V_pb4_1 += -V_pb4_1 + V_pb3_1
0	delta_V_lheart_1 += -V_lheart_1 + V_pb4_1
0	delta_V_artery_1 += -V_other_in + V_lheart_1
0	delta_V_other_1 += -(V_other_1 - V_other_base) + V_other_in
1	delta_V_artery_1 += -V_hb_in
1	delta_V_pv_1 += -V_pv_out
1	delta_V_hb_inlet_1 += -V_hb_inlet_1 + V_pv_out + V_hb_in
1	delta_V_fhb1_1 += -V_fhb1_1 + V_hb_inlet_1
1	delta_V_fhb2_1 += -V_fhb2_1 + V_fhb1_1
1	delta_V_fhb3_1 += -V_fhb3_1 + V_fhb2_1
1	delta_V_fhb4_1 += -V_fhb4_1 + V_fhb3_1
1	delta_V_fhb5_1 += -V_fhb5_1 + V_fhb4_1
1	delta_V_hb_outlet_1 += -V_hb_outlet_1 + V_fhb5_1
1	delta_V_vein_1 += V_hb_outlet_1
2	# print(" t: ", t, "phase_gbd: ", phase_gbd_1) # 0: empty, 1: refill, 2: full
2	V_gbd_empty_1 = ff_gbd_empty_on*V_gbd_1 if phase_gbd_1 == 0 else V_gbd_empty_off
2	V_gbd_refill_1 = V_gbd_refill_on if phase_gbd_1 == 1 else Iw_gbd_abs*tau_bile if phase_gbd_1 == 0 else Iw_gbd_abs*tau_bile + V_gbd_empty_off
2	delta_V_hduct_1 += -V_hduct_1
2	delta_V_gbd_1 += -V_gbd_empty_1 + V_gbd_refill_1
2	delta_V_bduct_1 += -V_bduct_1 + (V_hduct_1 - V_gbd_refill_1) + V_gbd_empty_1
2	delta_V_gf2_1 += V_bduct_1
3	delta_V_gf1_1 += -min(V_ge_max, ff_stm*V_gf1_1)
3	delta_V_gf2_1 += min(V_ge_max, ff_stm*V_gf1_1)
3	delta_W_gr1_1 += -min(V_ge_max, ff_stm*V_gf1_1)/V_gf1_1*W_gr1_1
3	delta_W_gr2_1 += min(V_ge_max, ff_stm*V_gf1_1)/V_gf1_1*W_gr1_1
4	delta_V_gf2_1 += -(1-fd_gt)*V_gf2_1
4	delta_V_gf3_1 += -(1-fd_gt)*V_gf3_1 + (1-2*fd_gt)*V_gf2_1
4	delta_y[114:143] += -(1-fd_gt)*y[114:143] + (1-2*fd_gt)*y[113:142] + fd_gt*y[112:141]
4	delta_V_gf33_1 += (1-fd_gt)*V_gf32_1 + fd_gt*V_gf31_1
4	delta_W_gr2_1 += -(1-fd_gt)*W_gr2_1
4	delta_W_gr3_1 += -(1-fd_gt)*W_gr3_1 + (1-2*fd_gt)*W_gr2_1
4	delta_y[152:181] += -(1-fd_gt)*y[152:181] + (1-2*fd_gt)*y[151:180] + fd_gt*y[150:179] + W_gr_epi
4	delta_W_gr33_1 += (1-fd_gt)*1/0.7*W_gr32_1 + fd_gt*W_gr31_1
5	delta_V_gf33_1 += -V_gf33_1
5	delta_V_gf34_1 += V_gf33_1
5	delta_W_gr33_1 += -W_gr33_1
5	delta_W_gr34_1 += W_gr33_1
6	delta_V_gf34_1 += -V_gf34_1
6	delta_V_gf35_1 += -V_gf35_1 + V_gf34_1
6	delta_V_gf36_1 += V_gf35_1
6	delta_W_gr34_1 += -W_gr34_1
6	delta_W_gr35_1 += -W_gr35_1 + W_gr34_1
6	delta_W_gr36_1 += W_gr35_1
7	delta_V_gf36_1 += -0.99*V_gf36_1
7	delta_V_gf37_1 += 0.99*V_gf36_1
7	delta_W_gr36_1 += -W_gr36_1
7	delta_W_gr37_1 += W_gr36_1
8	delta_V_artery_1 += -V_gb_in - V_spleenb
8	delta_V_gb_ma_1 += -V_gb_ma_1 + V_gb_in
8	delta_y[74:106] += -y[74:106] + V_gb_ma_1*(L_dji/L_gtotal)
8	delta_V_gb33_1 += -V_gb33_1 + V_gb_ma_1*(L_asc/L_gtotal)
8	delta_V_gb34_1 += -V_gb34_1 + V_gb_ma_1*(L_tsc/L_gtotal)
8	delta_V_gb35_1 += -V_gb35_1 + V_gb_ma_1*(L_tsc/L_gtotal)
8	delta_V_gb36_1 += -V_gb36_1 + V_gb_ma_1*(L_dsc/L_gtotal)
8	delta_V_gb37_1 += -V_gb37_1 + V_gb_ma_1*(L_rec/L_gtotal)
8	delta_V_pv_1 += np.sum(y[74:110]) + V_spleenb
8	delta_V_vein_1 += V_gb37_1
9	delta_V_artery_1 += -V_rb_in
9	delta_V_rb_glm_1 += -V_rb_glm_1 + V_rb_in
9	delta_V_ru0_1 += V_gfr
9	delta_V_rb1_1 += -V_rb1_1 + (V_rb_glm_1 - V_gfr)
9	delta_V_rb2_1 += -V_rb2_1 + V_rb1_1
9	delta_V_rb3_1 += -V_rb3_1 + V_rb2_1
9	delta_V_rb4_1 += -V_rb4_1 + V_rb3_1
9	delta_V_rb5_1 += -V_rb5_1 + V_rb4_1
9	delta_V_vein_1 += V_rb5_1
10	delta_V_ru0_1 += -V_ru0_1
10	delta_y[32:71] += -y[32:71] + y[31:70]
10	delta_V_ubd_1 += V_ru39_1
11	print("clock=", t/60+8, " breakfast")
11	t_meal_1 = t
11	delta_W_gr1_1 += W_meal
11	delta_V_gf1_1 += V_meal
12	print("clock=", t/60+8, " lunch")
12	t_meal_1 = t
12	delta_W_gr1_1 += W_meal
12	delta_V_gf1_1 += V_meal
13	print("clock=", t/60+8, " dinner")
13	t_meal_1 = t
13	delta_W_gr1_1 += W_meal
13	delta_V_gf1_1 += V_meal
14	print("clock=", t/60+8, " drink1")
14	delta_V_gf1_1 += V_drink
15	print("clock=", t/60+8, " drink2")
15	delta_V_gf1_1 += V_drink
16	print("clock=", t/60+8, " drink3")
16	delta_V_gf1_1 += V_drink
17	print("clock=", t/60+8, " urination1")
17	delta_V_ubd_1 += -(V_ubd_1 - V_ubd_rem) if V_ubd_1 > V_ubd_threshold else 0
17	delta_V_urinated_1 += V_ubd_1 - V_ubd_rem if V_ubd_1 > V_ubd_threshold else 0
18	print("clock=", t/60+8, " urination2")
18	delta_V_ubd_1 += -(V_ubd_1 - V_ubd_rem) if V_ubd_1 > V_ubd_threshold else 0
18	delta_V_urinated_1 += V_ubd_1 - V_ubd_rem if V_ubd_1 > V_ubd_threshold else 0
19	print("clock=", t/60+8, " urination3")
19	delta_V_ubd_1 += -(V_ubd_1 - V_ubd_rem) if V_ubd_1 > V_ubd_threshold else 0
19	delta_V_urinated_1 += V_ubd_1 - V_ubd_rem if V_ubd_1 > V_ubd_threshold else 0
20	print("clock=", t/60+8, " urination4")
20	delta_V_ubd_1 += -(V_ubd_1 - V_ubd_rem) if V_ubd_1 > V_ubd_threshold else 0
20	delta_V_urinated_1 += V_ubd_1 - V_ubd_rem if V_ubd_1 > V_ubd_threshold else 0
21	print("clock=", t/60+8, " urination5")
21	delta_V_ubd_1 += -(V_ubd_1 - V_ubd_rem) if V_ubd_1 > V_ubd_threshold else 0
21	delta_V_urinated_1 += V_ubd_1 - V_ubd_rem if V_ubd_1 > V_ubd_threshold else 0
22	print("clock=", t/60+8, " defecation")
22	delta_V_gf37_1 += -0.99*V_gf37_1
22	delta_V_gf_def_1 += 0.99*V_gf37_1
22	delta_W_gr37_1 += -W_gr37_1
22	delta_W_gr_def_1 += W_gr37_1
0	delta_X_vein_1 += -V_cb_in/V_vein_1*X_vein_1 + (V_other_1 - V_other_base)*X_other_1/V_other_1/Kp_msz
0	delta_X_rheart_1 += -X_rheart_1 + V_cb_in/V_vein_1*X_vein_1
0	delta_X_pb1_1 += -X_pb1_1 + X_rheart_1
0	delta_X_pb2_1 += -X_pb2_1 + X_pb1_1
0	delta_X_pb3_1 += -X_pb3_1 + X_pb2_1
0	delta_X_pb4_1 += -X_pb4_1 + X_pb3_1
0	delta_X_lheart_1 += -X_lheart_1 + X_pb4_1
0	delta_X_artery_1 += -V_other_in/V_artery_1*X_artery_1 + X_lheart_1
0	delta_X_other_1 += -(V_other_1 - V_other_base)*X_other_1/V_other_1/Kp_msz + V_other_in/V_artery_1*X_artery_1
1	delta_X_artery_1 += -V_hb_in/V_artery_1*X_artery_1
1	delta_X_pv_1 += -V_pv_out/V_pv_1*X_pv_1
1	delta_X_hb_inlet_1 += -X_hb_inlet_1 + V_pv_out/V_pv_1*X_pv_1 + V_hb_in/V_artery_1*X_artery_1
1	delta_X_fhb1_1 += -V_fhb1_1*(1 - fd_hb)/(V_fhb1_1+V_hi/5)*X_fhb1_1 + X_hb_inlet_1
1	delta_X_fhb2_1 += -V_fhb2_1*(1 - fd_hb)/(V_fhb2_1+V_hi/5)*X_fhb2_1 + V_fhb1_1*(1 - 2*fd_hb)/(V_fhb1_1+V_hi/5)*X_fhb1_1
1	delta_X_fhb3_1 += -V_fhb3_1*(1 - fd_hb)/(V_fhb3_1+V_hi/5)*X_fhb3_1 + V_fhb2_1*(1 - 2*fd_hb)/(V_fhb2_1+V_hi/5)*X_fhb2_1 + V_fhb1_1*fd_hb/(V_fhb1_1+V_hi/5)*X_fhb1_1
1	delta_X_fhb4_1 += -V_fhb4_1*(1 - fd_hb)/(V_fhb4_1+V_hi/5)*X_fhb4_1 + V_fhb3_1*(1 - 2*fd_hb)/(V_fhb3_1+V_hi/5)*X_fhb3_1 + V_fhb2_1*fd_hb/(V_fhb2_1+V_hi/5)*X_fhb2_1
1	delta_X_fhb5_1 += -V_fhb5_1*(1 - fd_hb)/(V_fhb5_1+V_hi/5)*X_fhb5_1 + V_fhb4_1*(1 - 2*fd_hb)/(V_fhb4_1+V_hi/5)*X_fhb4_1 + V_fhb3_1*fd_hb/(V_fhb3_1+V_hi/5)*X_fhb3_1
1	delta_X_hb_outlet_1 += -X_hb_outlet_1 + V_fhb5_1*(1 - fd_hb)/(V_fhb5_1+V_hi/5)*X_fhb5_1 + V_fhb4_1*fd_hb/(V_fhb4_1+V_hi/5)*X_fhb4_1
1	delta_X_vein_1 += X_hb_outlet_1
2	delta_X_hduct_1 += -X_hduct_1
2	delta_X_gbd_1 += -V_gbd_empty_1/V_gbd_1*X_gbd_1 + V_gbd_refill_1/V_hduct_1*X_hduct_1
2	delta_X_bduct_1 += -X_bduct_1 + (V_hduct_1 - V_gbd_refill_1)/V_hduct_1*X_hduct_1 + V_gbd_empty_1/V_gbd_1*X_gbd_1
2	delta_X_gf2_1 += X_bduct_1
3	delta_X_gf1_1 += -min(V_ge_max, ff_stm*V_gf1_1)/V_gf1_1*X_gf1_1
3	delta_X_gf2_1 += min(V_ge_max, ff_stm*V_gf1_1)/V_gf1_1*X_gf1_1
4	delta_X_gf2_1 += -(1-fd_gt)*X_gf2_1
4	delta_X_gf3_1 += -(1-fd_gt)*X_gf3_1 + (1-2*fd_gt)*X_gf2_1
4	delta_y[300:329] += -(1-fd_gt)*y[300:329] + (1-2*fd_gt)*y[299:328] + fd_gt*y[298:327]
4	delta_X_gf33_1 += (1-fd_gt)*X_gf32_1 + fd_gt*X_gf31_1
5	delta_X_gf33_1 += -X_gf33_1
5	delta_X_gf34_1 += X_gf33_1
6	delta_X_gf34_1 += -X_gf34_1
6	delta_X_gf35_1 += -X_gf35_1 + X_gf34_1
6	delta_X_gf36_1 += X_gf35_1
7	delta_X_gf36_1 += -0.99*X_gf36_1
7	delta_X_gf37_1 += 0.99*X_gf36_1
8	delta_X_artery_1 += -V_gb_in/V_artery_1*X_artery_1 - V_spleenb/V_artery_1*X_artery_1
8	delta_X_gb_ma_1 += -X_gb_ma_1 + V_gb_in/V_artery_1*X_artery_1
8	delta_y[260:292] += -y[260:292] + X_gb_ma_1*(L_dji/L_gtotal)
8	delta_X_gb33_1 += -X_gb33_1 + X_gb_ma_1*(L_asc/L_gtotal)
8	delta_X_gb34_1 += -X_gb34_1 + X_gb_ma_1*(L_tsc/L_gtotal)
8	delta_X_gb35_1 += -X_gb35_1 + X_gb_ma_1*(L_tsc/L_gtotal)
8	delta_X_gb36_1 += -X_gb36_1 + X_gb_ma_1*(L_dsc/L_gtotal)
8	delta_X_gb37_1 += -X_gb37_1 + X_gb_ma_1*(L_rec/L_gtotal)
8	delta_X_pv_1 += np.sum(y[260:296]) + V_spleenb/V_artery_1*X_artery_1
8	delta_X_vein_1 += X_gb37_1
9	delta_X_artery_1 += -V_rb_in/V_artery_1*X_artery_1
9	delta_X_rb_glm_1 += -X_rb_glm_1 + V_rb_in/V_artery_1*X_artery_1
9	delta_X_ru0_1 += V_gfr/V_rb_glm_1*fu_b_msz*X_rb_glm_1
9	delta_X_rb1_1 += -X_rb1_1 + (V_rb_glm_1 - fu_b_msz*V_gfr)/V_rb_glm_1*X_rb_glm_1
9	delta_X_rb2_1 += -X_rb2_1 + X_rb1_1
9	delta_X_rb3_1 += -X_rb3_1 + X_rb2_1
9	delta_X_rb4_1 += -X_rb4_1 + X_rb3_1
9	delta_X_rb5_1 += -X_rb5_1 + X_rb4_1
9	delta_X_vein_1 += X_rb5_1
10	delta_X_ru0_1 += -X_ru0_1
10	delta_y[218:257] += -y[218:257] + y[217:256]
10	delta_X_ubd_1 += X_ru39_1
17	delta_X_ubd_1 += -(V_ubd_1 - V_ubd_rem)/V_ubd_1*X_ubd_1 if V_ubd_1 > V_ubd_threshold else 0
17	delta_X_urinated_1 += (V_ubd_1 - V_ubd_rem)/V_ubd_1*X_ubd_1 if V_ubd_1 > V_ubd_threshold else 0
18	delta_X_ubd_1 += -(V_ubd_1 - V_ubd_rem)/V_ubd_1*X_ubd_1 if V_ubd_1 > V_ubd_threshold else 0
18	delta_X_urinated_1 += (V_ubd_1 - V_ubd_rem)/V_ubd_1*X_ubd_1 if V_ubd_1 > V_ubd_threshold else 0
19	delta_X_ubd_1 += -(V_ubd_1 - V_ubd_rem)/V_ubd_1*X_ubd_1 if V_ubd_1 > V_ubd_threshold else 0
19	delta_X_urinated_1 += (V_ubd_1 - V_ubd_rem)/V_ubd_1*X_ubd_1 if V_ubd_1 > V_ubd_threshold else 0
20	delta_X_ubd_1 += -(V_ubd_1 - V_ubd_rem)/V_ubd_1*X_ubd_1 if V_ubd_1 > V_ubd_threshold else 0
20	delta_X_urinated_1 += (V_ubd_1 - V_ubd_rem)/V_ubd_1*X_ubd_1 if V_ubd_1 > V_ubd_threshold else 0
21	delta_X_ubd_1 += -(V_ubd_1 - V_ubd_rem)/V_ubd_1*X_ubd_1 if V_ubd_1 > V_ubd_threshold else 0
21	delta_X_urinated_1 += (V_ubd_1 - V_ubd_rem)/V_ubd_1*X_ubd_1 if V_ubd_1 > V_ubd_threshold else 0
22	delta_X_gf37_1 += -0.99*X_gf37_1
22	delta_X_gf_def_1 += 0.99*X_gf37_1
3	delta_X_gp1_1 += -min(V_ge_max, ff_stm*V_gf1_1)/V_gf1_1*X_gp1_1
3	delta_X_gp2_1 += min(V_ge_max, ff_stm*V_gf1_1)/V_gf1_1*X_gp1_1
4	delta_X_gp2_1 += -(1-fd_gt)*X_gp2_1
4	delta_X_gp3_1 += -(1-fd_gt)*X_gp3_1 + (1-2*fd_gt)*X_gp2_1
4	delta_y[385:414] += -(1-fd_gt)*y[385:414] + (1-2*fd_gt)*y[384:413] + fd_gt*y[383:412]
4	delta_X_gp33_1 += (1-fd_gt)*X_gp32_1 + fd_gt*X_gp31_1
5	delta_X_gp33_1 += -X_gp33_1
5	delta_X_gp34_1 += X_gp33_1
6	delta_X_gp34_1 += -X_gp34_1
6	delta_X_gp35_1 += -X_gp35_1 + X_gp34_1
6	delta_X_gp36_1 += X_gp35_1
7	delta_X_gp36_1 += -0.99*X_gp36_1
7	delta_X_gp37_1 += 0.99*X_gp36_1
22	delta_X_gp37_1 += -0.99*X_gp37_1
22	delta_X_gp_def_1 += 0.99*X_gp37_1
3	delta_X_gs1_1 += -X_gs1_1 if min(V_ge_max, ff_stm*V_gf1_1)/V_gf1_1 > 0.08 else 0
3	delta_X_gs2_1 += X_gs1_1 if min(V_ge_max, ff_stm*V_gf1_1)/V_gf1_1 > 0.08 else 0
4	delta_X_gs2_1 += -X_gs2_1
4	delta_X_gs3_1 += -X_gs3_1 + X_gs2_1
4	delta_y[423:452] += -y[423:452] + y[422:451]
4	delta_X_gs33_1 += X_gs32_1
5	delta_X_gs33_1 += -X_gs33_1
5	delta_X_gs34_1 += X_gs33_1
6	delta_X_gs34_1 += -X_gs34_1
6	delta_X_gs35_1 += -X_gs35_1 + X_gs34_1
6	delta_X_gs36_1 += X_gs35_1
7	delta_X_gs36_1 += -X_gs36_1
7	delta_X_gs37_1 += X_gs36_1
22	delta_X_gs37_1 += -X_gs37_1
22	delta_X_gs_def_1 += X_gs37_1
6	delta_X_gx34_1 += -X_gx34_1
6	delta_X_gx35_1 += -X_gx35_1 + X_gx34_1
6	delta_X_gx36_1 += X_gx35_1
7	delta_X_gx36_1 += -X_gx36_1
7	delta_X_gx37_1 += X_gx36_1
22	delta_X_gx37_1 += -X_gx37_1
22	delta_X_gx_def_1 += X_gx37_1
0	delta_X_vein_1m += -V_cb_in/V_vein_1*X_vein_1m + (V_other_1 - V_other_base)*X_other_1m/V_other_1/Kp_met
0	delta_X_rheart_1m += -X_rheart_1m + V_cb_in/V_vein_1*X_vein_1m
0	delta_X_pb1_1m += -X_pb1_1m + X_rheart_1m
0	delta_X_pb2_1m += -X_pb2_1m + X_pb1_1m
0	delta_X_pb3_1m += -X_pb3_1m + X_pb2_1m
0	delta_X_pb4_1m += -X_pb4_1m + X_pb3_1m
0	delta_X_lheart_1m += -X_lheart_1m + X_pb4_1m
0	delta_X_artery_1m += -V_other_in/V_artery_1*X_artery_1m + X_lheart_1m
0	delta_X_other_1m += -(V_other_1 - V_other_base)*X_other_1m/V_other_1/Kp_met + V_other_in/V_artery_1*X_artery_1m
1	delta_X_artery_1m += -V_hb_in/V_artery_1*X_artery_1m
1	delta_X_pv_1m += -V_pv_out/V_pv_1*X_pv_1m
1	delta_X_hb_inlet_1m += -X_hb_inlet_1m + V_pv_out/V_pv_1*X_pv_1m + V_hb_in/V_artery_1*X_artery_1m
1	delta_X_fhb1_1m += -V_fhb1_1*(1 - fd_hb)/(V_fhb1_1+V_hi/5)*X_fhb1_1m + X_hb_inlet_1m
1	delta_X_fhb2_1m += -V_fhb2_1*(1 - fd_hb)/(V_fhb2_1+V_hi/5)*X_fhb2_1m + V_fhb1_1*(1 - 2*fd_hb)/(V_fhb1_1+V_hi/5)*X_fhb1_1m
1	delta_X_fhb3_1m += -V_fhb3_1*(1 - fd_hb)/(V_fhb3_1+V_hi/5)*X_fhb3_1m + V_fhb2_1*(1 - 2*fd_hb)/(V_fhb2_1+V_hi/5)*X_fhb2_1m + V_fhb1_1*fd_hb/(V_fhb1_1+V_hi/5)*X_fhb1_1m
1	delta_X_fhb4_1m += -V_fhb4_1*(1 - fd_hb)/(V_fhb4_1+V_hi/5)*X_fhb4_1m + V_fhb3_1*(1 - 2*fd_hb)/(V_fhb3_1+V_hi/5)*X_fhb3_1m + V_fhb2_1*fd_hb/(V_fhb2_1+V_hi/5)*X_fhb2_1m
1	delta_X_fhb5_1m += -V_fhb5_1*(1 - fd_hb)/(V_fhb5_1+V_hi/5)*X_fhb5_1m + V_fhb4_1*(1 - 2*fd_hb)/(V_fhb4_1+V_hi/5)*X_fhb4_1m + V_fhb3_1*fd_hb/(V_fhb3_1+V_hi/5)*X_fhb3_1m
1	delta_X_hb_outlet_1m += -X_hb_outlet_1m + V_fhb5_1*(1 - fd_hb)/(V_fhb5_1+V_hi/5)*X_fhb5_1m + V_fhb4_1*fd_hb/(V_fhb4_1+V_hi/5)*X_fhb4_1m
1	delta_X_vein_1m += X_hb_outlet_1m
2	delta_X_hduct_1m += -X_hduct_1m
2	delta_X_gbd_1m += -V_gbd_empty_1/V_gbd_1*X_gbd_1m + V_gbd_refill_1/V_hduct_1*X_hduct_1m
2	delta_X_bduct_1m += -X_bduct_1m + (V_hduct_1 - V_gbd_refill_1)/V_hduct_1*X_hduct_1m + V_gbd_empty_1/V_gbd_1*X_gbd_1m
2	delta_X_gf2_1m += X_bduct_1m
3	delta_X_gf1_1m += -min(V_ge_max, ff_stm*V_gf1_1)/V_gf1_1*X_gf1_1m
3	delta_X_gf2_1m += min(V_ge_max, ff_stm*V_gf1_1)/V_gf1_1*X_gf1_1m
4	delta_X_gf2_1m += -(1-fd_gt)*X_gf2_1m
4	delta_X_gf3_1m += -(1-fd_gt)*X_gf3_1m + (1-2*fd_gt)*X_gf2_1m
4	delta_y[571:600] += -(1-fd_gt)*y[571:600] + (1-2*fd_gt)*y[570:599] + fd_gt*y[569:598]
4	delta_X_gf33_1m += (1-fd_gt)*X_gf32_1m + fd_gt*X_gf31_1m
5	delta_X_gf33_1m += -X_gf33_1m
5	delta_X_gf34_1m += X_gf33_1m
6	delta_X_gf34_1m += -X_gf34_1m
6	delta_X_gf35_1m += -X_gf35_1m + X_gf34_1m
6	delta_X_gf36_1m += X_gf35_1m
7	delta_X_gf36_1m += -0.99*X_gf36_1m
7	delta_X_gf37_1m += 0.99*X_gf36_1m
8	delta_X_artery_1m += -V_gb_in/V_artery_1*X_artery_1m - V_spleenb/V_artery_1*X_artery_1m
8	delta_X_gb_ma_1m += -X_gb_ma_1m + V_gb_in/V_artery_1*X_artery_1m
8	delta_y[531:563] += -y[531:563] + X_gb_ma_1m*(L_dji/L_gtotal)
8	delta_X_gb33_1m += -X_gb33_1m + X_gb_ma_1m*(L_asc/L_gtotal)
8	delta_X_gb34_1m += -X_gb34_1m + X_gb_ma_1m*(L_tsc/L_gtotal)
8	delta_X_gb35_1m += -X_gb35_1m + X_gb_ma_1m*(L_tsc/L_gtotal)
8	delta_X_gb36_1m += -X_gb36_1m + X_gb_ma_1m*(L_dsc/L_gtotal)
8	delta_X_gb37_1m += -X_gb37_1m + X_gb_ma_1m*(L_rec/L_gtotal)
8	delta_X_pv_1m += np.sum(y[531:567]) + V_spleenb/V_artery_1*X_artery_1m
8	delta_X_vein_1m += X_gb37_1m
9	delta_X_artery_1m += -V_rb_in/V_artery_1*X_artery_1m
9	delta_X_rb_glm_1m += -X_rb_glm_1m + V_rb_in/V_artery_1*X_artery_1m
9	delta_X_ru0_1m += V_gfr/V_rb_glm_1*fu_b_met*X_rb_glm_1m
9	delta_X_rb1_1m += -X_rb1_1m + (V_rb_glm_1 - fu_b_met*V_gfr)/V_rb_glm_1*X_rb_glm_1m
9	delta_X_rb2_1m += -X_rb2_1m + X_rb1_1m
9	delta_X_rb3_1m += -X_rb3_1m + X_rb2_1m
9	delta_X_rb4_1m += -X_rb4_1m + X_rb3_1m
9	delta_X_rb5_1m += -X_rb5_1m + X_rb4_1m
9	delta_X_vein_1m += X_rb5_1m
10	delta_X_ru0_1m += -X_ru0_1m
10	delta_y[489:528] += -y[489:528] + y[488:527]
10	delta_X_ubd_1m += X_ru39_1m
17	delta_X_ubd_1m += -(V_ubd_1 - V_ubd_rem)/V_ubd_1*X_ubd_1m if V_ubd_1 > V_ubd_threshold else 0
17	delta_X_urinated_1m += (V_ubd_1 - V_ubd_rem)/V_ubd_1*X_ubd_1m if V_ubd_1 > V_ubd_threshold else 0
18	delta_X_ubd_1m += -(V_ubd_1 - V_ubd_rem)/V_ubd_1*X_ubd_1m if V_ubd_1 > V_ubd_threshold else 0
18	delta_X_urinated_1m += (V_ubd_1 - V_ubd_rem)/V_ubd_1*X_ubd_1m if V_ubd_1 > V_ubd_threshold else 0
19	delta_X_ubd_1m += -(V_ubd_1 - V_ubd_rem)/V_ubd_1*X_ubd_1m if V_ubd_1 > V_ubd_threshold else 0
19	delta_X_urinated_1m += (V_ubd_1 - V_ubd_rem)/V_ubd_1*X_ubd_1m if V_ubd_1 > V_ubd_threshold else 0
20	delta_X_ubd_1m += -(V_ubd_1 - V_ubd_rem)/V_ubd_1*X_ubd_1m if V_ubd_1 > V_ubd_threshold else 0
20	delta_X_urinated_1m += (V_ubd_1 - V_ubd_rem)/V_ubd_1*X_ubd_1m if V_ubd_1 > V_ubd_threshold else 0
21	delta_X_ubd_1m += -(V_ubd_1 - V_ubd_rem)/V_ubd_1*X_ubd_1m if V_ubd_1 > V_ubd_threshold else 0
21	delta_X_urinated_1m += (V_ubd_1 - V_ubd_rem)/V_ubd_1*X_ubd_1m if V_ubd_1 > V_ubd_threshold else 0
22	delta_X_gf37_1m += -0.99*X_gf37_1m
22	delta_X_gf_def_1m += 0.99*X_gf37_1m
6	delta_X_gx34_1m += -X_gx34_1m
6	delta_X_gx35_1m += -X_gx35_1m + X_gx34_1m
6	delta_X_gx36_1m += X_gx35_1m
7	delta_X_gx36_1m += -X_gx36_1m
7	delta_X_gx37_1m += X_gx36_1m
22	delta_X_gx37_1m += -X_gx37_1m
22	delta_X_gx_def_1m += X_gx37_1m
25	delta_X_gf1_1 += X_po_solution
25	delta_V_gf1_1 += V_water_solution
25	print("oral administration of solution: ", X_po_solution)
26	t_meal_1 = t
26	delta_W_gr1_1 += W_meal/2
26	delta_V_gf1_1 += V_meal/2
26	print("clock=", t/60+8, " snack during solution study")
27	t_meal_1 = t
27	delta_W_gr1_1 += W_meal
27	delta_V_gf1_1 += V_meal
27	print("clock=", t/60+8, " meal during solution study")
0	delta_V_vein_2 += -V_cb_in + (V_other_2 - V_other_base)
0	delta_V_rheart_2 += -V_rheart_2 + V_cb_in
0	delta_V_pb1_2 += -V_pb1_2 + V_rheart_2
0	delta_V_pb2_2 += -V_pb2_2 + V_pb1_2
0	delta_V_pb3_2 += -V_pb3_2 + V_pb2_2
0	delta_V_pb4_2 += -V_pb4_2 + V_pb3_2
0	delta_V_lheart_2 += -V_lheart_2 + V_pb4_2
0	delta_V_artery_2 += -V_other_in + V_lheart_2
0	delta_V_other_2 += -(V_other_2 - V_other_base) + V_other_in
1	delta_V_artery_2 += -V_hb_in
1	delta_V_pv_2 += -V_pv_out
1	delta_V_hb_inlet_2 += -V_hb_inlet_2 + V_pv_out + V_hb_in
1	delta_V_fhb1_2 += -V_fhb1_2 + V_hb_inlet_2
1	delta_V_fhb2_2 += -V_fhb2_2 + V_fhb1_2
1	delta_V_fhb3_2 += -V_fhb3_2 + V_fhb2_2
1	delta_V_fhb4_2 += -V_fhb4_2 + V_fhb3_2
1	delta_V_fhb5_2 += -V_fhb5_2 + V_fhb4_2
1	delta_V_hb_outlet_2 += -V_hb_outlet_2 + V_fhb5_2
1	delta_V_vein_2 += V_hb_outlet_2
2	# print(" t: ", t, "phase_gbd: ", phase_gbd_2) # 0: empty, 1: refill, 2: full
2	V_gbd_empty_2 = ff_gbd_empty_on*V_gbd_2 if phase_gbd_2 == 0 else V_gbd_empty_off
2	V_gbd_refill_2 = V_gbd_refill_on if phase_gbd_2 == 1 else Iw_gbd_abs*tau_bile if phase_gbd_2 == 0 else Iw_gbd_abs*tau_bile + V_gbd_empty_off
2	delta_V_hduct_2 += -V_hduct_2
2	delta_V_gbd_2 += -V_gbd_empty_2 + V_gbd_refill_2
2	delta_V_bduct_2 += -V_bduct_2 + (V_hduct_2 - V_gbd_refill_2) + V_gbd_empty_2
2	delta_V_gf2_2 += V_bduct_2
3	delta_V_gf1_2 += -min(V_ge_max, ff_stm*V_gf1_2)
3	delta_V_gf2_2 += min(V_ge_max, ff_stm*V_gf1_2)
3	delta_W_gr1_2 += -min(V_ge_max, ff_stm*V_gf1_2)/V_gf1_2*W_gr1_2
3	delta_W_gr2_2 += min(V_ge_max, ff_stm*V_gf1_2)/V_gf1_2*W_gr1_2
4	delta_V_gf2_2 += -(1-fd_gt)*V_gf2_2
4	delta_V_gf3_2 += -(1-fd_gt)*V_gf3_2 + (1-2*fd_gt)*V_gf2_2
4	delta_y[814:843] += -(1-fd_gt)*y[814:843] + (1-2*fd_gt)*y[813:842] + fd_gt*y[812:841]
4	delta_V_gf33_2 += (1-fd_gt)*V_gf32_2 + fd_gt*V_gf31_2
4	delta_W_gr2_2 += -(1-fd_gt)*W_gr2_2
4	delta_W_gr3_2 += -(1-fd_gt)*W_gr3_2 + (1-2*fd_gt)*W_gr2_2
4	delta_y[852:881] += -(1-fd_gt)*y[852:881] + (1-2*fd_gt)*y[851:880] + fd_gt*y[850:879] + W_gr_epi
4	delta_W_gr33_2 += (1-fd_gt)*1/0.7*W_gr32_2 + fd_gt*W_gr31_2
5	delta_V_gf33_2 += -V_gf33_2
5	delta_V_gf34_2 += V_gf33_2
5	delta_W_gr33_2 += -W_gr33_2
5	delta_W_gr34_2 += W_gr33_2
6	delta_V_gf34_2 += -V_gf34_2
6	delta_V_gf35_2 += -V_gf35_2 + V_gf34_2
6	delta_V_gf36_2 += V_gf35_2
6	delta_W_gr34_2 += -W_gr34_2
6	delta_W_gr35_2 += -W_gr35_2 + W_gr34_2
6	delta_W_gr36_2 += W_gr35_2
7	delta_V_gf36_2 += -0.99*V_gf36_2
7	delta_V_gf37_2 += 0.99*V_gf36_2
7	delta_W_gr36_2 += -W_gr36_2
7	delta_W_gr37_2 += W_gr36_2
8	delta_V_artery_2 += -V_gb_in - V_spleenb
8	delta_V_gb_ma_2 += -V_gb_ma_2 + V_gb_in
8	delta_y[774:806] += -y[774:806] + V_gb_ma_2*(L_dji/L_gtotal)
8	delta_V_gb33_2 += -V_gb33_2 + V_gb_ma_2*(L_asc/L_gtotal)
8	delta_V_gb34_2 += -V_gb34_2 + V_gb_ma_2*(L_tsc/L_gtotal)
8	delta_V_gb35_2 += -V_gb35_2 + V_gb_ma_2*(L_tsc/L_gtotal)
8	delta_V_gb36_2 += -V_gb36_2 + V_gb_ma_2*(L_dsc/L_gtotal)
8	delta_V_gb37_2 += -V_gb37_2 + V_gb_ma_2*(L_rec/L_gtotal)
8	delta_V_pv_2 += np.sum(y[774:810]) + V_spleenb
8	delta_V_vein_2 += V_gb37_2
9	delta_V_artery_2 += -V_rb_in
9	delta_V_rb_glm_2 += -V_rb_glm_2 + V_rb_in
9	delta_V_ru0_2 += V_gfr
9	delta_V_rb1_2 += -V_rb1_2 + (V_rb_glm_2 - V_gfr)
9	delta_V_rb2_2 += -V_rb2_2 + V_rb1_2
9	delta_V_rb3_2 += -V_rb3_2 + V_rb2_2
9	delta_V_rb4_2 += -V_rb4_2 + V_rb3_2
9	delta_V_rb5_2 += -V_rb5_2 + V_rb4_2
9	delta_V_vein_2 += V_rb5_2
10	delta_V_ru0_2 += -V_ru0_2
10	delta_y[732:771] += -y[732:771] + y[731:770]
10	delta_V_ubd_2 += V_ru39_2
11	print("clock=", t/60+8, " breakfast")
11	t_meal_2 = t
11	delta_W_gr1_2 += W_meal
11	delta_V_gf1_2 += V_meal
12	print("clock=", t/60+8, " lunch")
12	t_meal_2 = t
12	delta_W_gr1_2 += W_meal
12	delta_V_gf1_2 += V_meal
13	print("clock=", t/60+8, " dinner")
13	t_meal_2 = t
13	delta_W_gr1_2 += W_meal
13	delta_V_gf1_2 += V_meal
14	print("clock=", t/60+8, " drink1")
14	delta_V_gf1_2 += V_drink
15	print("clock=", t/60+8, " drink2")
15	delta_V_gf1_2 += V_drink
16	print("clock=", t/60+8, " drink3")
16	delta_V_gf1_2 += V_drink
17	print("clock=", t/60+8, " urination1")
17	delta_V_ubd_2 += -(V_ubd_2 - V_ubd_rem) if V_ubd_2 > V_ubd_threshold else 0
17	delta_V_urinated_2 += V_ubd_2 - V_ubd_rem if V_ubd_2 > V_ubd_threshold else 0
18	print("clock=", t/60+8, " urination2")
18	delta_V_ubd_2 += -(V_ubd_2 - V_ubd_rem) if V_ubd_2 > V_ubd_threshold else 0
18	delta_V_urinated_2 += V_ubd_2 - V_ubd_rem if V_ubd_2 > V_ubd_threshold else 0
19	print("clock=", t/60+8, " urination3")
19	delta_V_ubd_2 += -(V_ubd_2 - V_ubd_rem) if V_ubd_2 > V_ubd_threshold else 0
19	delta_V_urinated_2 += V_ubd_2 - V_ubd_rem if V_ubd_2 > V_ubd_threshold else 0
20	print("clock=", t/60+8, " urination4")
20	delta_V_ubd_2 += -(V_ubd_2 - V_ubd_rem) if V_ubd_2 > V_ubd_threshold else 0
20	delta_V_urinated_2 += V_ubd_2 - V_ubd_rem if V_ubd_2 > V_ubd_threshold else 0
21	print("clock=", t/60+8, " urination5")
21	delta_V_ubd_2 += -(V_ubd_2 - V_ubd_rem) if V_ubd_2 > V_ubd_threshold else 0
21	delta_V_urinated_2 += V_ubd_2 - V_ubd_rem if V_ubd_2 > V_ubd_threshold else 0
22	print("clock=", t/60+8, " defecation")
22	delta_V_gf37_2 += -0.99*V_gf37_2
22	delta_V_gf_def_2 += 0.99*V_gf37_2
22	delta_W_gr37_2 += -W_gr37_2
22	delta_W_gr_def_2 += W_gr37_2
0	delta_X_vein_2 += -V_cb_in/V_vein_2*X_vein_2 + (V_other_2 - V_other_base)*X_other_2/V_other_2/Kp_msz
0	delta_X_rheart_2 += -X_rheart_2 + V_cb_in/V_vein_2*X_vein_2
0	delta_X_pb1_2 += -X_pb1_2 + X_rheart_2
0	delta_X_pb2_2 += -X_pb2_2 + X_pb1_2
0	delta_X_pb3_2 += -X_pb3_2 + X_pb2_2
0	delta_X_pb4_2 += -X_pb4_2 + X_pb3_2
0	delta_X_lheart_2 += -X_lheart_2 + X_pb4_2
0	delta_X_artery_2 += -V_other_in/V_artery_2*X_artery_2 + X_lheart_2
0	delta_X_other_2 += -(V_other_2 - V_other_base)*X_other_2/V_other_2/Kp_msz + V_other_in/V_artery_2*X_artery_2
1	delta_X_artery_2 += -V_hb_in/V_artery_2*X_artery_2
1	delta_X_pv_2 += -V_pv_out/V_pv_2*X_pv_2
1	delta_X_hb_inlet_2 += -X_hb_inlet_2 + V_pv_out/V_pv_2*X_pv_2 + V_hb_in/V_artery_2*X_artery_2
1	delta_X_fhb1_2 += -V_fhb1_2*(1 - fd_hb)/(V_fhb1_2+V_hi/5)*X_fhb1_2 + X_hb_inlet_2
1	delta_X_fhb2_2 += -V_fhb2_2*(1 - fd_hb)/(V_fhb2_2+V_hi/5)*X_fhb2_2 + V_fhb1_2*(1 - 2*fd_hb)/(V_fhb1_2+V_hi/5)*X_fhb1_2
1	delta_X_fhb3_2 += -V_fhb3_2*(1 - fd_hb)/(V_fhb3_2+V_hi/5)*X_fhb3_2 + V_fhb2_2*(1 - 2*fd_hb)/(V_fhb2_2+V_hi/5)*X_fhb2_2 + V_fhb1_2*fd_hb/(V_fhb1_2+V_hi/5)*X_fhb1_2
1	delta_X_fhb4_2 += -V_fhb4_2*(1 - fd_hb)/(V_fhb4_2+V_hi/5)*X_fhb4_2 + V_fhb3_2*(1 - 2*fd_hb)/(V_fhb3_2+V_hi/5)*X_fhb3_2 + V_fhb2_2*fd_hb/(V_fhb2_2+V_hi/5)*X_fhb2_2
1	delta_X_fhb5_2 += -V_fhb5_2*(1 - fd_hb)/(V_fhb5_2+V_hi/5)*X_fhb5_2 + V_fhb4_2*(1 - 2*fd_hb)/(V_fhb4_2+V_hi/5)*X_fhb4_2 + V_fhb3_2*fd_hb/(V_fhb3_2+V_hi/5)*X_fhb3_2
1	delta_X_hb_outlet_2 += -X_hb_outlet_2 + V_fhb5_2*(1 - fd_hb)/(V_fhb5_2+V_hi/5)*X_fhb5_2 + V_fhb4_2*fd_hb/(V_fhb4_2+V_hi/5)*X_fhb4_2
1	delta_X_vein_2 += X_hb_outlet_2
2	delta_X_hduct_2 += -X_hduct_2
2	delta_X_gbd_2 += -V_gbd_empty_2/V_gbd_2*X_gbd_2 + V_gbd_refill_2/V_hduct_2*X_hduct_2
2	delta_X_bduct_2 += -X_bduct_2 + (V_hduct_2 - V_gbd_refill_2)/V_hduct_2*X_hduct_2 + V_gbd_empty_2/V_gbd_2*X_gbd_2
2	delta_X_gf2_2 += X_bduct_2
3	delta_X_gf1_2 += -min(V_ge_max, ff_stm*V_gf1_2)/V_gf1_2*X_gf1_2
3	delta_X_gf2_2 += min(V_ge_max, ff_stm*V_gf1_2)/V_gf1_2*X_gf1_2
4	delta_X_gf2_2 += -(1-fd_gt)*X_gf2_2
4	delta_X_gf3_2 += -(1-fd_gt)*X_gf3_2 + (1-2*fd_gt)*X_gf2_2
4	delta_y[1000:1029] += -(1-fd_gt)*y[1000:1029] + (1-2*fd_gt)*y[999:1028] + fd_gt*y[998:1027]
4	delta_X_gf33_2 += (1-fd_gt)*X_gf32_2 + fd_gt*X_gf31_2
5	delta_X_gf33_2 += -X_gf33_2
5	delta_X_gf34_2 += X_gf33_2
6	delta_X_gf34_2 += -X_gf34_2
6	delta_X_gf35_2 += -X_gf35_2 + X_gf34_2
6	delta_X_gf36_2 += X_gf35_2
7	delta_X_gf36_2 += -0.99*X_gf36_2
7	delta_X_gf37_2 += 0.99*X_gf36_2
8	delta_X_artery_2 += -V_gb_in/V_artery_2*X_artery_2 - V_spleenb/V_artery_2*X_artery_2
8	delta_X_gb_ma_2 += -X_gb_ma_2 + V_gb_in/V_artery_2*X_artery_2
8	delta_y[960:992] += -y[960:992] + X_gb_ma_2*(L_dji/L_gtotal)
8	delta_X_gb33_2 += -X_gb33_2 + X_gb_ma_2*(L_asc/L_gtotal)
8	delta_X_gb34_2 += -X_gb34_2 + X_gb_ma_2*(L_tsc/L_gtotal)
8	delta_X_gb35_2 += -X_gb35_2 + X_gb_ma_2*(L_tsc/L_gtotal)
8	delta_X_gb36_2 += -X_gb36_2 + X_gb_ma_2*(L_dsc/L_gtotal)
8	delta_X_gb37_2 += -X_gb37_2 + X_gb_ma_2*(L_rec/L_gtotal)
8	delta_X_pv_2 += np.sum(y[960:996]) + V_spleenb/V_artery_2*X_artery_2
8	delta_X_vein_2 += X_gb37_2
9	delta_X_artery_2 += -V_rb_in/V_artery_2*X_artery_2
9	delta_X_rb_glm_2 += -X_rb_glm_2 + V_rb_in/V_artery_2*X_artery_2
9	delta_X_ru0_2 += V_gfr/V_rb_glm_2*fu_b_msz*X_rb_glm_2
9	delta_X_rb1_2 += -X_rb1_2 + (V_rb_glm_2 - fu_b_msz*V_gfr)/V_rb_glm_2*X_rb_glm_2
9	delta_X_rb2_2 += -X_rb2_2 + X_rb1_2
9	delta_X_rb3_2 += -X_rb3_2 + X_rb2_2
9	delta_X_rb4_2 += -X_rb4_2 + X_rb3_2
9	delta_X_rb5_2 += -X_rb5_2 + X_rb4_2
9	delta_X_vein_2 += X_rb5_2
10	delta_X_ru0_2 += -X_ru0_2
10	delta_y[918:957] += -y[918:957] + y[917:956]
10	delta_X_ubd_2 += X_ru39_2
17	delta_X_ubd_2 += -(V_ubd_2 - V_ubd_rem)/V_ubd_2*X_ubd_2 if V_ubd_2 > V_ubd_threshold else 0
17	delta_X_urinated_2 += (V_ubd_2 - V_ubd_rem)/V_ubd_2*X_ubd_2 if V_ubd_2 > V_ubd_threshold else 0
18	delta_X_ubd_2 += -(V_ubd_2 - V_ubd_rem)/V_ubd_2*X_ubd_2 if V_ubd_2 > V_ubd_threshold else 0
18	delta_X_urinated_2 += (V_ubd_2 - V_ubd_rem)/V_ubd_2*X_ubd_2 if V_ubd_2 > V_ubd_threshold else 0
19	delta_X_ubd_2 += -(V_ubd_2 - V_ubd_rem)/V_ubd_2*X_ubd_2 if V_ubd_2 > V_ubd_threshold else 0
19	delta_X_urinated_2 += (V_ubd_2 - V_ubd_rem)/V_ubd_2*X_ubd_2 if V_ubd_2 > V_ubd_threshold else 0
20	delta_X_ubd_2 += -(V_ubd_2 - V_ubd_rem)/V_ubd_2*X_ubd_2 if V_ubd_2 > V_ubd_threshold else 0
20	delta_X_urinated_2 += (V_ubd_2 - V_ubd_rem)/V_ubd_2*X_ubd_2 if V_ubd_2 > V_ubd_threshold else 0
21	delta_X_ubd_2 += -(V_ubd_2 - V_ubd_rem)/V_ubd_2*X_ubd_2 if V_ubd_2 > V_ubd_threshold else 0
21	delta_X_urinated_2 += (V_ubd_2 - V_ubd_rem)/V_ubd_2*X_ubd_2 if V_ubd_2 > V_ubd_threshold else 0
22	delta_X_gf37_2 += -0.99*X_gf37_2
22	delta_X_gf_def_2 += 0.99*X_gf37_2
3	delta_X_gp1_2 += -min(V_ge_max, ff_stm*V_gf1_2)/V_gf1_2*X_gp1_2
3	delta_X_gp2_2 += min(V_ge_max, ff_stm*V_gf1_2)/V_gf1_2*X_gp1_2
4	delta_X_gp2_2 += -(1-fd_gt)*X_gp2_2
4	delta_X_gp3_2 += -(1-fd_gt)*X_gp3_2 + (1-2*fd_gt)*X_gp2_2
4	delta_y[1085:1114] += -(1-fd_gt)*y[1085:1114] + (1-2*fd_gt)*y[1084:1113] + fd_gt*y[1083:1112]
4	delta_X_gp33_2 += (1-fd_gt)*X_gp32_2 + fd_gt*X_gp31_2
5	delta_X_gp33_2 += -X_gp33_2
5	delta_X_gp34_2 += X_gp33_2
6	delta_X_gp34_2 += -X_gp34_2
6	delta_X_gp35_2 += -X_gp35_2 + X_gp34_2
6	delta_X_gp36_2 += X_gp35_2
7	delta_X_gp36_2 += -0.99*X_gp36_2
7	delta_X_gp37_2 += 0.99*X_gp36_2
22	delta_X_gp37_2 += -0.99*X_gp37_2
22	delta_X_gp_def_2 += 0.99*X_gp37_2
3	delta_X_gs1_2 += -X_gs1_2 if min(V_ge_max, ff_stm*V_gf1_2)/V_gf1_2 > 0.08 else 0
3	delta_X_gs2_2 += X_gs1_2 if min(V_ge_max, ff_stm*V_gf1_2)/V_gf1_2 > 0.08 else 0
4	delta_X_gs2_2 += -X_gs2_2
4	delta_X_gs3_2 += -X_gs3_2 + X_gs2_2
4	delta_y[1123:1152] += -y[1123:1152] + y[1122:1151]
4	delta_X_gs33_2 += X_gs32_2
5	delta_X_gs33_2 += -X_gs33_2
5	delta_X_gs34_2 += X_gs33_2
6	delta_X_gs34_2 += -X_gs34_2
6	delta_X_gs35_2 += -X_gs35_2 + X_gs34_2
6	delta_X_gs36_2 += X_gs35_2
7	delta_X_gs36_2 += -X_gs36_2
7	delta_X_gs37_2 += X_gs36_2
22	delta_X_gs37_2 += -X_gs37_2
22	delta_X_gs_def_2 += X_gs37_2
6	delta_X_gx34_2 += -X_gx34_2
6	delta_X_gx35_2 += -X_gx35_2 + X_gx34_2
6	delta_X_gx36_2 += X_gx35_2
7	delta_X_gx36_2 += -X_gx36_2
7	delta_X_gx37_2 += X_gx36_2
22	delta_X_gx37_2 += -X_gx37_2
22	delta_X_gx_def_2 += X_gx37_2
0	delta_X_vein_2m += -V_cb_in/V_vein_2*X_vein_2m + (V_other_2 - V_other_base)*X_other_2m/V_other_2/Kp_met
0	delta_X_rheart_2m += -X_rheart_2m + V_cb_in/V_vein_2*X_vein_2m
0	delta_X_pb1_2m += -X_pb1_2m + X_rheart_2m
0	delta_X_pb2_2m += -X_pb2_2m + X_pb1_2m
0	delta_X_pb3_2m += -X_pb3_2m + X_pb2_2m
0	delta_X_pb4_2m += -X_pb4_2m + X_pb3_2m
0	delta_X_lheart_2m += -X_lheart_2m + X_pb4_2m
0	delta_X_artery_2m += -V_other_in/V_artery_2*X_artery_2m + X_lheart_2m
0	delta_X_other_2m += -(V_other_2 - V_other_base)*X_other_2m/V_other_2/Kp_met + V_other_in/V_artery_2*X_artery_2m
1	delta_X_artery_2m += -V_hb_in/V_artery_2*X_artery_2m
1	delta_X_pv_2m += -V_pv_out/V_pv_2*X_pv_2m
1	delta_X_hb_inlet_2m += -X_hb_inlet_2m + V_pv_out/V_pv_2*X_pv_2m + V_hb_in/V_artery_2*X_artery_2m
1	delta_X_fhb1_2m += -V_fhb1_2*(1 - fd_hb)/(V_fhb1_2+V_hi/5)*X_fhb1_2m + X_hb_inlet_2m
1	delta_X_fhb2_2m += -V_fhb2_2*(1 - fd_hb)/(V_fhb2_2+V_hi/5)*X_fhb2_2m + V_fhb1_2*(1 - 2*fd_hb)/(V_fhb1_2+V_hi/5)*X_fhb1_2m
1	delta_X_fhb3_2m += -V_fhb3_2*(1 - fd_hb)/(V_fhb3_2+V_hi/5)*X_fhb3_2m + V_fhb2_2*(1 - 2*fd_hb)/(V_fhb2_2+V_hi/5)*X_fhb2_2m + V_fhb1_2*fd_hb/(V_fhb1_2+V_hi/5)*X_fhb1_2m
1	delta_X_fhb4_2m += -V_fhb4_2*(1 - fd_hb)/(V_fhb4_2+V_hi/5)*X_fhb4_2m + V_fhb3_2*(1 - 2*fd_hb)/(V_fhb3_2+V_hi/5)*X_fhb3_2m + V_fhb2_2*fd_hb/(V_fhb2_2+V_hi/5)*X_fhb2_2m
1	delta_X_fhb5_2m += -V_fhb5_2*(1 - fd_hb)/(V_fhb5_2+V_hi/5)*X_fhb5_2m + V_fhb4_2*(1 - 2*fd_hb)/(V_fhb4_2+V_hi/5)*X_fhb4_2m + V_fhb3_2*fd_hb/(V_fhb3_2+V_hi/5)*X_fhb3_2m
1	delta_X_hb_outlet_2m += -X_hb_outlet_2m + V_fhb5_2*(1 - fd_hb)/(V_fhb5_2+V_hi/5)*X_fhb5_2m + V_fhb4_2*fd_hb/(V_fhb4_2+V_hi/5)*X_fhb4_2m
1	delta_X_vein_2m += X_hb_outlet_2m
2	delta_X_hduct_2m += -X_hduct_2m
2	delta_X_gbd_2m += -V_gbd_empty_2/V_gbd_2*X_gbd_2m + V_gbd_refill_2/V_hduct_2*X_hduct_2m
2	delta_X_bduct_2m += -X_bduct_2m + (V_hduct_2 - V_gbd_refill_2)/V_hduct_2*X_hduct_2m + V_gbd_empty_2/V_gbd_2*X_gbd_2m
2	delta_X_gf2_2m += X_bduct_2m
3	delta_X_gf1_2m += -min(V_ge_max, ff_stm*V_gf1_2)/V_gf1_2*X_gf1_2m
3	delta_X_gf2_2m += min(V_ge_max, ff_stm*V_gf1_2)/V_gf1_2*X_gf1_2m
4	delta_X_gf2_2m += -(1-fd_gt)*X_gf2_2m
4	delta_X_gf3_2m += -(1-fd_gt)*X_gf3_2m + (1-2*fd_gt)*X_gf2_2m
4	delta_y[1271:1300] += -(1-fd_gt)*y[1271:1300] + (1-2*fd_gt)*y[1270:1299] + fd_gt*y[1269:1298]
4	delta_X_gf33_2m += (1-fd_gt)*X_gf32_2m + fd_gt*X_gf31_2m
5	delta_X_gf33_2m += -X_gf33_2m
5	delta_X_gf34_2m += X_gf33_2m
6	delta_X_gf34_2m += -X_gf34_2m
6	delta_X_gf35_2m += -X_gf35_2m + X_gf34_2m
6	delta_X_gf36_2m += X_gf35_2m
7	delta_X_gf36_2m += -0.99*X_gf36_2m
7	delta_X_gf37_2m += 0.99*X_gf36_2m
8	delta_X_artery_2m += -V_gb_in/V_artery_2*X_artery_2m - V_spleenb/V_artery_2*X_artery_2m
8	delta_X_gb_ma_2m += -X_gb_ma_2m + V_gb_in/V_artery_2*X_artery_2m
8	delta_y[1231:1263] += -y[1231:1263] + X_gb_ma_2m*(L_dji/L_gtotal)
8	delta_X_gb33_2m += -X_gb33_2m + X_gb_ma_2m*(L_asc/L_gtotal)
8	delta_X_gb34_2m += -X_gb34_2m + X_gb_ma_2m*(L_tsc/L_gtotal)
8	delta_X_gb35_2m += -X_gb35_2m + X_gb_ma_2m*(L_tsc/L_gtotal)
8	delta_X_gb36_2m += -X_gb36_2m + X_gb_ma_2m*(L_dsc/L_gtotal)
8	delta_X_gb37_2m += -X_gb37_2m + X_gb_ma_2m*(L_rec/L_gtotal)
8	delta_X_pv_2m += np.sum(y[1231:1267]) + V_spleenb/V_artery_2*X_artery_2m
8	delta_X_vein_2m += X_gb37_2m
9	delta_X_artery_2m += -V_rb_in/V_artery_2*X_artery_2m
9	delta_X_rb_glm_2m += -X_rb_glm_2m + V_rb_in/V_artery_2*X_artery_2m
9	delta_X_ru0_2m += V_gfr/V_rb_glm_2*fu_b_met*X_rb_glm_2m
9	delta_X_rb1_2m += -X_rb1_2m + (V_rb_glm_2 - fu_b_met*V_gfr)/V_rb_glm_2*X_rb_glm_2m
9	delta_X_rb2_2m += -X_rb2_2m + X_rb1_2m
9	delta_X_rb3_2m += -X_rb3_2m + X_rb2_2m
9	delta_X_rb4_2m += -X_rb4_2m + X_rb3_2m
9	delta_X_rb5_2m += -X_rb5_2m + X_rb4_2m
9	delta_X_vein_2m += X_rb5_2m
10	delta_X_ru0_2m += -X_ru0_2m
10	delta_y[1189:1228] += -y[1189:1228] + y[1188:1227]
10	delta_X_ubd_2m += X_ru39_2m
17	delta_X_ubd_2m += -(V_ubd_2 - V_ubd_rem)/V_ubd_2*X_ubd_2m if V_ubd_2 > V_ubd_threshold else 0
17	delta_X_urinated_2m += (V_ubd_2 - V_ubd_rem)/V_ubd_2*X_ubd_2m if V_ubd_2 > V_ubd_threshold else 0
18	delta_X_ubd_2m += -(V_ubd_2 - V_ubd_rem)/V_ubd_2*X_ubd_2m if V_ubd_2 > V_ubd_threshold else 0
18	delta_X_urinated_2m += (V_ubd_2 - V_ubd_rem)/V_ubd_2*X_ubd_2m if V_ubd_2 > V_ubd_threshold else 0
19	delta_X_ubd_2m += -(V_ubd_2 - V_ubd_rem)/V_ubd_2*X_ubd_2m if V_ubd_2 > V_ubd_threshold else 0
19	delta_X_urinated_2m += (V_ubd_2 - V_ubd_rem)/V_ubd_2*X_ubd_2m if V_ubd_2 > V_ubd_threshold else 0
20	delta_X_ubd_2m += -(V_ubd_2 - V_ubd_rem)/V_ubd_2*X_ubd_2m if V_ubd_2 > V_ubd_threshold else 0
20	delta_X_urinated_2m += (V_ubd_2 - V_ubd_rem)/V_ubd_2*X_ubd_2m if V_ubd_2 > V_ubd_threshold else 0
21	delta_X_ubd_2m += -(V_ubd_2 - V_ubd_rem)/V_ubd_2*X_ubd_2m if V_ubd_2 > V_ubd_threshold else 0
21	delta_X_urinated_2m += (V_ubd_2 - V_ubd_rem)/V_ubd_2*X_ubd_2m if V_ubd_2 > V_ubd_threshold else 0
22	delta_X_gf37_2m += -0.99*X_gf37_2m
22	delta_X_gf_def_2m += 0.99*X_gf37_2m
6	delta_X_gx34_2m += -X_gx34_2m
6	delta_X_gx35_2m += -X_gx35_2m + X_gx34_2m
6	delta_X_gx36_2m += X_gx35_2m
7	delta_X_gx36_2m += -X_gx36_2m
7	delta_X_gx37_2m += X_gx36_2m
22	delta_X_gx37_2m += -X_gx37_2m
22	delta_X_gx_def_2m += X_gx37_2m
28	delta_X_gs1_2 += X_po_pentasa
28	delta_V_gf1_2 += V_water_form
28	print("oral administration of pentasa: ", X_po_pentasa)
29	t_meal_2 = t
29	delta_W_gr1_2 += W_meal/2
29	delta_V_gf1_2 += V_meal/2
29	print("clock=", t/60+8, " snack during formulation study")
30	t_meal_2 = t
30	delta_W_gr1_2 += W_meal
30	delta_V_gf1_2 += V_meal
30	print("clock=", t/60+8, " meal during formulation study")
0	delta_V_vein_3 += -V_cb_in + (V_other_3 - V_other_base)
0	delta_V_rheart_3 += -V_rheart_3 + V_cb_in
0	delta_V_pb1_3 += -V_pb1_3 + V_rheart_3
0	delta_V_pb2_3 += -V_pb2_3 + V_pb1_3
0	delta_V_pb3_3 += -V_pb3_3 + V_pb2_3
0	delta_V_pb4_3 += -V_pb4_3 + V_pb3_3
0	delta_V_lheart_3 += -V_lheart_3 + V_pb4_3
0	delta_V_artery_3 += -V_other_in + V_lheart_3
0	delta_V_other_3 += -(V_other_3 - V_other_base) + V_other_in
1	delta_V_artery_3 += -V_hb_in
1	delta_V_pv_3 += -V_pv_out
1	delta_V_hb_inlet_3 += -V_hb_inlet_3 + V_pv_out + V_hb_in
1	delta_V_fhb1_3 += -V_fhb1_3 + V_hb_inlet_3
1	delta_V_fhb2_3 += -V_fhb2_3 + V_fhb1_3
1	delta_V_fhb3_3 += -V_fhb3_3 + V_fhb2_3
1	delta_V_fhb4_3 += -V_fhb4_3 + V_fhb3_3
1	delta_V_fhb5_3 += -V_fhb5_3 + V_fhb4_3
1	delta_V_hb_outlet_3 += -V_hb_outlet_3 + V_fhb5_3
1	delta_V_vein_3 += V_hb_outlet_3
2	# print(" t: ", t, "phase_gbd: ", phase_gbd_3) # 0: empty, 1: refill, 2: full
2	V_gbd_empty_3 = ff_gbd_empty_on*V_gbd_3 if phase_gbd_3 == 0 else V_gbd_empty_off
2	V_gbd_refill_3 = V_gbd_refill_on if phase_gbd_3 == 1 else Iw_gbd_abs*tau_bile if phase_gbd_3 == 0 else Iw_gbd_abs*tau_bile + V_gbd_empty_off
2	delta_V_hduct_3 += -V_hduct_3
2	delta_V_gbd_3 += -V_gbd_empty_3 + V_gbd_refill_3
2	delta_V_bduct_3 += -V_bduct_3 + (V_hduct_3 - V_gbd_refill_3) + V_gbd_empty_3
2	delta_V_gf2_3 += V_bduct_3
3	delta_V_gf1_3 += -min(V_ge_max, ff_stm*V_gf1_3)
3	delta_V_gf2_3 += min(V_ge_max, ff_stm*V_gf1_3)
3	delta_W_gr1_3 += -min(V_ge_max, ff_stm*V_gf1_3)/V_gf1_3*W_gr1_3
3	delta_W_gr2_3 += min(V_ge_max, ff_stm*V_gf1_3)/V_gf1_3*W_gr1_3
4	delta_V_gf2_3 += -(1-fd_gt)*V_gf2_3
4	delta_V_gf3_3 += -(1-fd_gt)*V_gf3_3 + (1-2*fd_gt)*V_gf2_3
4	delta_y[1514:1543] += -(1-fd_gt)*y[1514:1543] + (1-2*fd_gt)*y[1513:1542] + fd_gt*y[1512:1541]
4	delta_V_gf33_3 += (1-fd_gt)*V_gf32_3 + fd_gt*V_gf31_3
4	delta_W_gr2_3 += -(1-fd_gt)*W_gr2_3
4	delta_W_gr3_3 += -(1-fd_gt)*W_gr3_3 + (1-2*fd_gt)*W_gr2_3
4	delta_y[1552:1581] += -(1-fd_gt)*y[1552:1581] + (1-2*fd_gt)*y[1551:1580] + fd_gt*y[1550:1579] + W_gr_epi
4	delta_W_gr33_3 += (1-fd_gt)*1/0.7*W_gr32_3 + fd_gt*W_gr31_3
5	delta_V_gf33_3 += -V_gf33_3
5	delta_V_gf34_3 += V_gf33_3
5	delta_W_gr33_3 += -W_gr33_3
5	delta_W_gr34_3 += W_gr33_3
6	delta_V_gf34_3 += -V_gf34_3
6	delta_V_gf35_3 += -V_gf35_3 + V_gf34_3
6	delta_V_gf36_3 += V_gf35_3
6	delta_W_gr34_3 += -W_gr34_3
6	delta_W_gr35_3 += -W_gr35_3 + W_gr34_3
6	delta_W_gr36_3 += W_gr35_3
7	delta_V_gf36_3 += -0.99*V_gf36_3
7	delta_V_gf37_3 += 0.99*V_gf36_3
7	delta_W_gr36_3 += -W_gr36_3
7	delta_W_gr37_3 += W_gr36_3
8	delta_V_artery_3 += -V_gb_in - V_spleenb
8	delta_V_gb_ma_3 += -V_gb_ma_3 + V_gb_in
8	delta_y[1474:1506] += -y[1474:1506] + V_gb_ma_3*(L_dji/L_gtotal)
8	delta_V_gb33_3 += -V_gb33_3 + V_gb_ma_3*(L_asc/L_gtotal)
8	delta_V_gb34_3 += -V_gb34_3 + V_gb_ma_3*(L_tsc/L_gtotal)
8	delta_V_gb35_3 += -V_gb35_3 + V_gb_ma_3*(L_tsc/L_gtotal)
8	delta_V_gb36_3 += -V_gb36_3 + V_gb_ma_3*(L_dsc/L_gtotal)
8	delta_V_gb37_3 += -V_gb37_3 + V_gb_ma_3*(L_rec/L_gtotal)
8	delta_V_pv_3 += np.sum(y[1474:1510]) + V_spleenb
8	delta_V_vein_3 += V_gb37_3
9	delta_V_artery_3 += -V_rb_in
9	delta_V_rb_glm_3 += -V_rb_glm_3 + V_rb_in
9	delta_V_ru0_3 += V_gfr
9	delta_V_rb1_3 += -V_rb1_3 + (V_rb_glm_3 - V_gfr)
9	delta_V_rb2_3 += -V_rb2_3 + V_rb1_3
9	delta_V_rb3_3 += -V_rb3_3 + V_rb2_3
9	delta_V_rb4_3 += -V_rb4_3 + V_rb3_3
9	delta_V_rb5_3 += -V_rb5_3 + V_rb4_3
9	delta_V_vein_3 += V_rb5_3
10	delta_V_ru0_3 += -V_ru0_3
10	delta_y[1432:1471] += -y[1432:1471] + y[1431:1470]
10	delta_V_ubd_3 += V_ru39_3
11	print("clock=", t/60+8, " breakfast")
11	t_meal_3 = t
11	delta_W_gr1_3 += W_meal
11	delta_V_gf1_3 += V_meal
12	print("clock=", t/60+8, " lunch")
12	t_meal_3 = t
12	delta_W_gr1_3 += W_meal
12	delta_V_gf1_3 += V_meal
13	print("clock=", t/60+8, " dinner")
13	t_meal_3 = t
13	delta_W_gr1_3 += W_meal
13	delta_V_gf1_3 += V_meal
14	print("clock=", t/60+8, " drink1")
14	delta_V_gf1_3 += V_drink
15	print("clock=", t/60+8, " drink2")
15	delta_V_gf1_3 += V_drink
16	print("clock=", t/60+8, " drink3")
16	delta_V_gf1_3 += V_drink
17	print("clock=", t/60+8, " urination1")
17	delta_V_ubd_3 += -(V_ubd_3 - V_ubd_rem) if V_ubd_3 > V_ubd_threshold else 0
17	delta_V_urinated_3 += V_ubd_3 - V_ubd_rem if V_ubd_3 > V_ubd_threshold else 0
18	print("clock=", t/60+8, " urination2")
18	delta_V_ubd_3 += -(V_ubd_3 - V_ubd_rem) if V_ubd_3 > V_ubd_threshold else 0
18	delta_V_urinated_3 += V_ubd_3 - V_ubd_rem if V_ubd_3 > V_ubd_threshold else 0
19	print("clock=", t/60+8, " urination3")
19	delta_V_ubd_3 += -(V_ubd_3 - V_ubd_rem) if V_ubd_3 > V_ubd_threshold else 0
19	delta_V_urinated_3 += V_ubd_3 - V_ubd_rem if V_ubd_3 > V_ubd_threshold else 0
20	print("clock=", t/60+8, " urination4")
20	delta_V_ubd_3 += -(V_ubd_3 - V_ubd_rem) if V_ubd_3 > V_ubd_threshold else 0
20	delta_V_urinated_3 += V_ubd_3 - V_ubd_rem if V_ubd_3 > V_ubd_threshold else 0
21	print("clock=", t/60+8, " urination5")
21	delta_V_ubd_3 += -(V_ubd_3 - V_ubd_rem) if V_ubd_3 > V_ubd_threshold else 0
21	delta_V_urinated_3 += V_ubd_3 - V_ubd_rem if V_ubd_3 > V_ubd_threshold else 0
22	print("clock=", t/60+8, " defecation")
22	delta_V_gf37_3 += -0.99*V_gf37_3
22	delta_V_gf_def_3 += 0.99*V_gf37_3
22	delta_W_gr37_3 += -W_gr37_3
22	delta_W_gr_def_3 += W_gr37_3
0	delta_X_vein_3 += -V_cb_in/V_vein_3*X_vein_3 + (V_other_3 - V_other_base)*X_other_3/V_other_3/Kp_msz
0	delta_X_rheart_3 += -X_rheart_3 + V_cb_in/V_vein_3*X_vein_3
0	delta_X_pb1_3 += -X_pb1_3 + X_rheart_3
0	delta_X_pb2_3 += -X_pb2_3 + X_pb1_3
0	delta_X_pb3_3 += -X_pb3_3 + X_pb2_3
0	delta_X_pb4_3 += -X_pb4_3 + X_pb3_3
0	delta_X_lheart_3 += -X_lheart_3 + X_pb4_3
0	delta_X_artery_3 += -V_other_in/V_artery_3*X_artery_3 + X_lheart_3
0	delta_X_other_3 += -(V_other_3 - V_other_base)*X_other_3/V_other_3/Kp_msz + V_other_in/V_artery_3*X_artery_3
1	delta_X_artery_3 += -V_hb_in/V_artery_3*X_artery_3
1	delta_X_pv_3 += -V_pv_out/V_pv_3*X_pv_3
1	delta_X_hb_inlet_3 += -X_hb_inlet_3 + V_pv_out/V_pv_3*X_pv_3 + V_hb_in/V_artery_3*X_artery_3
1	delta_X_fhb1_3 += -V_fhb1_3*(1 - fd_hb)/(V_fhb1_3+V_hi/5)*X_fhb1_3 + X_hb_inlet_3
1	delta_X_fhb2_3 += -V_fhb2_3*(1 - fd_hb)/(V_fhb2_3+V_hi/5)*X_fhb2_3 + V_fhb1_3*(1 - 2*fd_hb)/(V_fhb1_3+V_hi/5)*X_fhb1_3
1	delta_X_fhb3_3 += -V_fhb3_3*(1 - fd_hb)/(V_fhb3_3+V_hi/5)*X_fhb3_3 + V_fhb2_3*(1 - 2*fd_hb)/(V_fhb2_3+V_hi/5)*X_fhb2_3 + V_fhb1_3*fd_hb/(V_fhb1_3+V_hi/5)*X_fhb1_3
1	delta_X_fhb4_3 += -V_fhb4_3*(1 - fd_hb)/(V_fhb4_3+V_hi/5)*X_fhb4_3 + V_fhb3_3*(1 - 2*fd_hb)/(V_fhb3_3+V_hi/5)*X_fhb3_3 + V_fhb2_3*fd_hb/(V_fhb2_3+V_hi/5)*X_fhb2_3
1	delta_X_fhb5_3 += -V_fhb5_3*(1 - fd_hb)/(V_fhb5_3+V_hi/5)*X_fhb5_3 + V_fhb4_3*(1 - 2*fd_hb)/(V_fhb4_3+V_hi/5)*X_fhb4_3 + V_fhb3_3*fd_hb/(V_fhb3_3+V_hi/5)*X_fhb3_3
1	delta_X_hb_outlet_3 += -X_hb_outlet_3 + V_fhb5_3*(1 - fd_hb)/(V_fhb5_3+V_hi/5)*X_fhb5_3 + V_fhb4_3*fd_hb/(V_fhb4_3+V_hi/5)*X_fhb4_3
1	delta_X_vein_3 += X_hb_outlet_3
2	delta_X_hduct_3 += -X_hduct_3
2	delta_X_gbd_3 += -V_gbd_empty_3/V_gbd_3*X_gbd_3 + V_gbd_refill_3/V_hduct_3*X_hduct_3
2	delta_X_bduct_3 += -X_bduct_3 + (V_hduct_3 - V_gbd_refill_3)/V_hduct_3*X_hduct_3 + V_gbd_empty_3/V_gbd_3*X_gbd_3
2	delta_X_gf2_3 += X_bduct_3
3	delta_X_gf1_3 += -min(V_ge_max, ff_stm*V_gf1_3)/V_gf1_3*X_gf1_3
3	delta_X_gf2_3 += min(V_ge_max, ff_stm*V_gf1_3)/V_gf1_3*X_gf1_3
4	delta_X_gf2_3 += -(1-fd_gt)*X_gf2_3
4	delta_X_gf3_3 += -(1-fd_gt)*X_gf3_3 + (1-2*fd_gt)*X_gf2_3
4	delta_y[1700:1729] += -(1-fd_gt)*y[1700:1729] + (1-2*fd_gt)*y[1699:1728] + fd_gt*y[1698:1727]
4	delta_X_gf33_3 += (1-fd_gt)*X_gf32_3 + fd_gt*X_gf31_3
5	delta_X_gf33_3 += -X_gf33_3
5	delta_X_gf34_3 += X_gf33_3
6	delta_X_gf34_3 += -X_gf34_3
6	delta_X_gf35_3 += -X_gf35_3 + X_gf34_3
6	delta_X_gf36_3 += X_gf35_3
7	delta_X_gf36_3 += -0.99*X_gf36_3
7	delta_X_gf37_3 += 0.99*X_gf36_3
8	delta_X_artery_3 += -V_gb_in/V_artery_3*X_artery_3 - V_spleenb/V_artery_3*X_artery_3
8	delta_X_gb_ma_3 += -X_gb_ma_3 + V_gb_in/V_artery_3*X_artery_3
8	delta_y[1660:1692] += -y[1660:1692] + X_gb_ma_3*(L_dji/L_gtotal)
8	delta_X_gb33_3 += -X_gb33_3 + X_gb_ma_3*(L_asc/L_gtotal)
8	delta_X_gb34_3 += -X_gb34_3 + X_gb_ma_3*(L_tsc/L_gtotal)
8	delta_X_gb35_3 += -X_gb35_3 + X_gb_ma_3*(L_tsc/L_gtotal)
8	delta_X_gb36_3 += -X_gb36_3 + X_gb_ma_3*(L_dsc/L_gtotal)
8	delta_X_gb37_3 += -X_gb37_3 + X_gb_ma_3*(L_rec/L_gtotal)
8	delta_X_pv_3 += np.sum(y[1660:1696]) + V_spleenb/V_artery_3*X_artery_3
8	delta_X_vein_3 += X_gb37_3
9	delta_X_artery_3 += -V_rb_in/V_artery_3*X_artery_3
9	delta_X_rb_glm_3 += -X_rb_glm_3 + V_rb_in/V_artery_3*X_artery_3
9	delta_X_ru0_3 += V_gfr/V_rb_glm_3*fu_b_msz*X_rb_glm_3
9	delta_X_rb1_3 += -X_rb1_3 + (V_rb_glm_3 - fu_b_msz*V_gfr)/V_rb_glm_3*X_rb_glm_3
9	delta_X_rb2_3 += -X_rb2_3 + X_rb1_3
9	delta_X_rb3_3 += -X_rb3_3 + X_rb2_3
9	delta_X_rb4_3 += -X_rb4_3 + X_rb3_3
9	delta_X_rb5_3 += -X_rb5_3 + X_rb4_3
9	delta_X_vein_3 += X_rb5_3
10	delta_X_ru0_3 += -X_ru0_3
10	delta_y[1618:1657] += -y[1618:1657] + y[1617:1656]
10	delta_X_ubd_3 += X_ru39_3
17	delta_X_ubd_3 += -(V_ubd_3 - V_ubd_rem)/V_ubd_3*X_ubd_3 if V_ubd_3 > V_ubd_threshold else 0
17	delta_X_urinated_3 += (V_ubd_3 - V_ubd_rem)/V_ubd_3*X_ubd_3 if V_ubd_3 > V_ubd_threshold else 0
18	delta_X_ubd_3 += -(V_ubd_3 - V_ubd_rem)/V_ubd_3*X_ubd_3 if V_ubd_3 > V_ubd_threshold else 0
18	delta_X_urinated_3 += (V_ubd_3 - V_ubd_rem)/V_ubd_3*X_ubd_3 if V_ubd_3 > V_ubd_threshold else 0
19	delta_X_ubd_3 += -(V_ubd_3 - V_ubd_rem)/V_ubd_3*X_ubd_3 if V_ubd_3 > V_ubd_threshold else 0
19	delta_X_urinated_3 += (V_ubd_3 - V_ubd_rem)/V_ubd_3*X_ubd_3 if V_ubd_3 > V_ubd_threshold else 0
20	delta_X_ubd_3 += -(V_ubd_3 - V_ubd_rem)/V_ubd_3*X_ubd_3 if V_ubd_3 > V_ubd_threshold else 0
20	delta_X_urinated_3 += (V_ubd_3 - V_ubd_rem)/V_ubd_3*X_ubd_3 if V_ubd_3 > V_ubd_threshold else 0
21	delta_X_ubd_3 += -(V_ubd_3 - V_ubd_rem)/V_ubd_3*X_ubd_3 if V_ubd_3 > V_ubd_threshold else 0
21	delta_X_urinated_3 += (V_ubd_3 - V_ubd_rem)/V_ubd_3*X_ubd_3 if V_ubd_3 > V_ubd_threshold else 0
22	delta_X_gf37_3 += -0.99*X_gf37_3
22	delta_X_gf_def_3 += 0.99*X_gf37_3
3	delta_X_gp1_3 += -min(V_ge_max, ff_stm*V_gf1_3)/V_gf1_3*X_gp1_3
3	delta_X_gp2_3 += min(V_ge_max, ff_stm*V_gf1_3)/V_gf1_3*X_gp1_3
4	delta_X_gp2_3 += -(1-fd_gt)*X_gp2_3
4	delta_X_gp3_3 += -(1-fd_gt)*X_gp3_3 + (1-2*fd_gt)*X_gp2_3
4	delta_y[1785:1814] += -(1-fd_gt)*y[1785:1814] + (1-2*fd_gt)*y[1784:1813] + fd_gt*y[1783:1812]
4	delta_X_gp33_3 += (1-fd_gt)*X_gp32_3 + fd_gt*X_gp31_3
5	delta_X_gp33_3 += -X_gp33_3
5	delta_X_gp34_3 += X_gp33_3
6	delta_X_gp34_3 += -X_gp34_3
6	delta_X_gp35_3 += -X_gp35_3 + X_gp34_3
6	delta_X_gp36_3 += X_gp35_3
7	delta_X_gp36_3 += -0.99*X_gp36_3
7	delta_X_gp37_3 += 0.99*X_gp36_3
22	delta_X_gp37_3 += -0.99*X_gp37_3
22	delta_X_gp_def_3 += 0.99*X_gp37_3
3	delta_X_gs1_3 += -X_gs1_3 if min(V_ge_max, ff_stm*V_gf1_3)/V_gf1_3 > 0.08 else 0
3	delta_X_gs2_3 += X_gs1_3 if min(V_ge_max, ff_stm*V_gf1_3)/V_gf1_3 > 0.08 else 0
4	delta_X_gs2_3 += -X_gs2_3
4	delta_X_gs3_3 += -X_gs3_3 + X_gs2_3
4	delta_y[1823:1852] += -y[1823:1852] + y[1822:1851]
4	delta_X_gs33_3 += X_gs32_3
5	delta_X_gs33_3 += -X_gs33_3
5	delta_X_gs34_3 += X_gs33_3
6	delta_X_gs34_3 += -X_gs34_3
6	delta_X_gs35_3 += -X_gs35_3 + X_gs34_3
6	delta_X_gs36_3 += X_gs35_3
7	delta_X_gs36_3 += -X_gs36_3
7	delta_X_gs37_3 += X_gs36_3
22	delta_X_gs37_3 += -X_gs37_3
22	delta_X_gs_def_3 += X_gs37_3
6	delta_X_gx34_3 += -X_gx34_3
6	delta_X_gx35_3 += -X_gx35_3 + X_gx34_3
6	delta_X_gx36_3 += X_gx35_3
7	delta_X_gx36_3 += -X_gx36_3
7	delta_X_gx37_3 += X_gx36_3
22	delta_X_gx37_3 += -X_gx37_3
22	delta_X_gx_def_3 += X_gx37_3
0	delta_X_vein_3m += -V_cb_in/V_vein_3*X_vein_3m + (V_other_3 - V_other_base)*X_other_3m/V_other_3/Kp_met
0	delta_X_rheart_3m += -X_rheart_3m + V_cb_in/V_vein_3*X_vein_3m
0	delta_X_pb1_3m += -X_pb1_3m + X_rheart_3m
0	delta_X_pb2_3m += -X_pb2_3m + X_pb1_3m
0	delta_X_pb3_3m += -X_pb3_3m + X_pb2_3m
0	delta_X_pb4_3m += -X_pb4_3m + X_pb3_3m
0	delta_X_lheart_3m += -X_lheart_3m + X_pb4_3m
0	delta_X_artery_3m += -V_other_in/V_artery_3*X_artery_3m + X_lheart_3m
0	delta_X_other_3m += -(V_other_3 - V_other_base)*X_other_3m/V_other_3/Kp_met + V_other_in/V_artery_3*X_artery_3m
1	delta_X_artery_3m += -V_hb_in/V_artery_3*X_artery_3m
1	delta_X_pv_3m += -V_pv_out/V_pv_3*X_pv_3m
1	delta_X_hb_inlet_3m += -X_hb_inlet_3m + V_pv_out/V_pv_3*X_pv_3m + V_hb_in/V_artery_3*X_artery_3m
1	delta_X_fhb1_3m += -V_fhb1_3*(1 - fd_hb)/(V_fhb1_3+V_hi/5)*X_fhb1_3m + X_hb_inlet_3m
1	delta_X_fhb2_3m += -V_fhb2_3*(1 - fd_hb)/(V_fhb2_3+V_hi/5)*X_fhb2_3m + V_fhb1_3*(1 - 2*fd_hb)/(V_fhb1_3+V_hi/5)*X_fhb1_3m
1	delta_X_fhb3_3m += -V_fhb3_3*(1 - fd_hb)/(V_fhb3_3+V_hi/5)*X_fhb3_3m + V_fhb2_3*(1 - 2*fd_hb)/(V_fhb2_3+V_hi/5)*X_fhb2_3m + V_fhb1_3*fd_hb/(V_fhb1_3+V_hi/5)*X_fhb1_3m
1	delta_X_fhb4_3m += -V_fhb4_3*(1 - fd_hb)/(V_fhb4_3+V_hi/5)*X_fhb4_3m + V_fhb3_3*(1 - 2*fd_hb)/(V_fhb3_3+V_hi/5)*X_fhb3_3m + V_fhb2_3*fd_hb/(V_fhb2_3+V_hi/5)*X_fhb2_3m
1	delta_X_fhb5_3m += -V_fhb5_3*(1 - fd_hb)/(V_fhb5_3+V_hi/5)*X_fhb5_3m + V_fhb4_3*(1 - 2*fd_hb)/(V_fhb4_3+V_hi/5)*X_fhb4_3m + V_fhb3_3*fd_hb/(V_fhb3_3+V_hi/5)*X_fhb3_3m
1	delta_X_hb_outlet_3m += -X_hb_outlet_3m + V_fhb5_3*(1 - fd_hb)/(V_fhb5_3+V_hi/5)*X_fhb5_3m + V_fhb4_3*fd_hb/(V_fhb4_3+V_hi/5)*X_fhb4_3m
1	delta_X_vein_3m += X_hb_outlet_3m
2	delta_X_hduct_3m += -X_hduct_3m
2	delta_X_gbd_3m += -V_gbd_empty_3/V_gbd_3*X_gbd_3m + V_gbd_refill_3/V_hduct_3*X_hduct_3m
2	delta_X_bduct_3m += -X_bduct_3m + (V_hduct_3 - V_gbd_refill_3)/V_hduct_3*X_hduct_3m + V_gbd_empty_3/V_gbd_3*X_gbd_3m
2	delta_X_gf2_3m += X_bduct_3m
3	delta_X_gf1_3m += -min(V_ge_max, ff_stm*V_gf1_3)/V_gf1_3*X_gf1_3m
3	delta_X_gf2_3m += min(V_ge_max, ff_stm*V_gf1_3)/V_gf1_3*X_gf1_3m
4	delta_X_gf2_3m += -(1-fd_gt)*X_gf2_3m
4	delta_X_gf3_3m += -(1-fd_gt)*X_gf3_3m + (1-2*fd_gt)*X_gf2_3m
4	delta_y[1971:2000] += -(1-fd_gt)*y[1971:2000] + (1-2*fd_gt)*y[1970:1999] + fd_gt*y[1969:1998]
4	delta_X_gf33_3m += (1-fd_gt)*X_gf32_3m + fd_gt*X_gf31_3m
5	delta_X_gf33_3m += -X_gf33_3m
5	delta_X_gf34_3m += X_gf33_3m
6	delta_X_gf34_3m += -X_gf34_3m
6	delta_X_gf35_3m += -X_gf35_3m + X_gf34_3m
6	delta_X_gf36_3m += X_gf35_3m
7	delta_X_gf36_3m += -0.99*X_gf36_3m
7	delta_X_gf37_3m += 0.99*X_gf36_3m
8	delta_X_artery_3m += -V_gb_in/V_artery_3*X_artery_3m - V_spleenb/V_artery_3*X_artery_3m
8	delta_X_gb_ma_3m += -X_gb_ma_3m + V_gb_in/V_artery_3*X_artery_3m
8	delta_y[1931:1963] += -y[1931:1963] + X_gb_ma_3m*(L_dji/L_gtotal)
8	delta_X_gb33_3m += -X_gb33_3m + X_gb_ma_3m*(L_asc/L_gtotal)
8	delta_X_gb34_3m += -X_gb34_3m + X_gb_ma_3m*(L_tsc/L_gtotal)
8	delta_X_gb35_3m += -X_gb35_3m + X_gb_ma_3m*(L_tsc/L_gtotal)
8	delta_X_gb36_3m += -X_gb36_3m + X_gb_ma_3m*(L_dsc/L_gtotal)
8	delta_X_gb37_3m += -X_gb37_3m + X_gb_ma_3m*(L_rec/L_gtotal)
8	delta_X_pv_3m += np.sum(y[1931:1967]) + V_spleenb/V_artery_3*X_artery_3m
8	delta_X_vein_3m += X_gb37_3m
9	delta_X_artery_3m += -V_rb_in/V_artery_3*X_artery_3m
9	delta_X_rb_glm_3m += -X_rb_glm_3m + V_rb_in/V_artery_3*X_artery_3m
9	delta_X_ru0_3m += V_gfr/V_rb_glm_3*fu_b_met*X_rb_glm_3m
9	delta_X_rb1_3m += -X_rb1_3m + (V_rb_glm_3 - fu_b_met*V_gfr)/V_rb_glm_3*X_rb_glm_3m
9	delta_X_rb2_3m += -X_rb2_3m + X_rb1_3m
9	delta_X_rb3_3m += -X_rb3_3m + X_rb2_3m
9	delta_X_rb4_3m += -X_rb4_3m + X_rb3_3m
9	delta_X_rb5_3m += -X_rb5_3m + X_rb4_3m
9	delta_X_vein_3m += X_rb5_3m
10	delta_X_ru0_3m += -X_ru0_3m
10	delta_y[1889:1928] += -y[1889:1928] + y[1888:1927]
10	delta_X_ubd_3m += X_ru39_3m
17	delta_X_ubd_3m += -(V_ubd_3 - V_ubd_rem)/V_ubd_3*X_ubd_3m if V_ubd_3 > V_ubd_threshold else 0
17	delta_X_urinated_3m += (V_ubd_3 - V_ubd_rem)/V_ubd_3*X_ubd_3m if V_ubd_3 > V_ubd_threshold else 0
18	delta_X_ubd_3m += -(V_ubd_3 - V_ubd_rem)/V_ubd_3*X_ubd_3m if V_ubd_3 > V_ubd_threshold else 0
18	delta_X_urinated_3m += (V_ubd_3 - V_ubd_rem)/V_ubd_3*X_ubd_3m if V_ubd_3 > V_ubd_threshold else 0
19	delta_X_ubd_3m += -(V_ubd_3 - V_ubd_rem)/V_ubd_3*X_ubd_3m if V_ubd_3 > V_ubd_threshold else 0
19	delta_X_urinated_3m += (V_ubd_3 - V_ubd_rem)/V_ubd_3*X_ubd_3m if V_ubd_3 > V_ubd_threshold else 0
20	delta_X_ubd_3m += -(V_ubd_3 - V_ubd_rem)/V_ubd_3*X_ubd_3m if V_ubd_3 > V_ubd_threshold else 0
20	delta_X_urinated_3m += (V_ubd_3 - V_ubd_rem)/V_ubd_3*X_ubd_3m if V_ubd_3 > V_ubd_threshold else 0
21	delta_X_ubd_3m += -(V_ubd_3 - V_ubd_rem)/V_ubd_3*X_ubd_3m if V_ubd_3 > V_ubd_threshold else 0
21	delta_X_urinated_3m += (V_ubd_3 - V_ubd_rem)/V_ubd_3*X_ubd_3m if V_ubd_3 > V_ubd_threshold else 0
22	delta_X_gf37_3m += -0.99*X_gf37_3m
22	delta_X_gf_def_3m += 0.99*X_gf37_3m
6	delta_X_gx34_3m += -X_gx34_3m
6	delta_X_gx35_3m += -X_gx35_3m + X_gx34_3m
6	delta_X_gx36_3m += X_gx35_3m
7	delta_X_gx36_3m += -X_gx36_3m
7	delta_X_gx37_3m += X_gx36_3m
22	delta_X_gx37_3m += -X_gx37_3m
22	delta_X_gx_def_3m += X_gx37_3m
28	delta_X_gs1_3 += X_po_apriso
28	delta_V_gf1_3 += V_water_form
28	print("oral administration of apriso: ", X_po_apriso)
29	t_meal_3 = t
29	delta_W_gr1_3 += W_meal/2
29	delta_V_gf1_3 += V_meal/2
29	print("clock=", t/60+8, " snack during formulation study")
30	t_meal_3 = t
30	delta_W_gr1_3 += W_meal
30	delta_V_gf1_3 += V_meal
30	print("clock=", t/60+8, " meal during formulation study")
0	delta_V_vein_4 += -V_cb_in + (V_other_4 - V_other_base)
0	delta_V_rheart_4 += -V_rheart_4 + V_cb_in
0	delta_V_pb1_4 += -V_pb1_4 + V_rheart_4
0	delta_V_pb2_4 += -V_pb2_4 + V_pb1_4
0	delta_V_pb3_4 += -V_pb3_4 + V_pb2_4
0	delta_V_pb4_4 += -V_pb4_4 + V_pb3_4
0	delta_V_lheart_4 += -V_lheart_4 + V_pb4_4
0	delta_V_artery_4 += -V_other_in + V_lheart_4
0	delta_V_other_4 += -(V_other_4 - V_other_base) + V_other_in
1	delta_V_artery_4 += -V_hb_in
1	delta_V_pv_4 += -V_pv_out
1	delta_V_hb_inlet_4 += -V_hb_inlet_4 + V_pv_out + V_hb_in
1	delta_V_fhb1_4 += -V_fhb1_4 + V_hb_inlet_4
1	delta_V_fhb2_4 += -V_fhb2_4 + V_fhb1_4
1	delta_V_fhb3_4 += -V_fhb3_4 + V_fhb2_4
1	delta_V_fhb4_4 += -V_fhb4_4 + V_fhb3_4
1	delta_V_fhb5_4 += -V_fhb5_4 + V_fhb4_4
1	delta_V_hb_outlet_4 += -V_hb_outlet_4 + V_fhb5_4
1	delta_V_vein_4 += V_hb_outlet_4
2	# print(" t: ", t, "phase_gbd: ", phase_gbd_4) # 0: empty, 1: refill, 2: full
2	V_gbd_empty_4 = ff_gbd_empty_on*V_gbd_4 if phase_gbd_4 == 0 else V_gbd_empty_off
2	V_gbd_refill_4 = V_gbd_refill_on if phase_gbd_4 == 1 else Iw_gbd_abs*tau_bile if phase_gbd_4 == 0 else Iw_gbd_abs*tau_bile + V_gbd_empty_off
2	delta_V_hduct_4 += -V_hduct_4
2	delta_V_gbd_4 += -V_gbd_empty_4 + V_gbd_refill_4
2	delta_V_bduct_4 += -V_bduct_4 + (V_hduct_4 - V_gbd_refill_4) + V_gbd_empty_4
2	delta_V_gf2_4 += V_bduct_4
3	delta_V_gf1_4 += -min(V_ge_max, ff_stm*V_gf1_4)
3	delta_V_gf2_4 += min(V_ge_max, ff_stm*V_gf1_4)
3	delta_W_gr1_4 += -min(V_ge_max, ff_stm*V_gf1_4)/V_gf1_4*W_gr1_4
3	delta_W_gr2_4 += min(V_ge_max, ff_stm*V_gf1_4)/V_gf1_4*W_gr1_4
4	delta_V_gf2_4 += -(1-fd_gt)*V_gf2_4
4	delta_V_gf3_4 += -(1-fd_gt)*V_gf3_4 + (1-2*fd_gt)*V_gf2_4
4	delta_y[2214:2243] += -(1-fd_gt)*y[2214:2243] + (1-2*fd_gt)*y[2213:2242] + fd_gt*y[2212:2241]
4	delta_V_gf33_4 += (1-fd_gt)*V_gf32_4 + fd_gt*V_gf31_4
4	delta_W_gr2_4 += -(1-fd_gt)*W_gr2_4
4	delta_W_gr3_4 += -(1-fd_gt)*W_gr3_4 + (1-2*fd_gt)*W_gr2_4
4	delta_y[2252:2281] += -(1-fd_gt)*y[2252:2281] + (1-2*fd_gt)*y[2251:2280] + fd_gt*y[2250:2279] + W_gr_epi
4	delta_W_gr33_4 += (1-fd_gt)*1/0.7*W_gr32_4 + fd_gt*W_gr31_4
5	delta_V_gf33_4 += -V_gf33_4
5	delta_V_gf34_4 += V_gf33_4
5	delta_W_gr33_4 += -W_gr33_4
5	delta_W_gr34_4 += W_gr33_4
6	delta_V_gf34_4 += -V_gf34_4
6	delta_V_gf35_4 += -V_gf35_4 + V_gf34_4
6	delta_V_gf36_4 += V_gf35_4
6	delta_W_gr34_4 += -W_gr34_4
6	delta_W_gr35_4 += -W_gr35_4 + W_gr34_4
6	delta_W_gr36_4 += W_gr35_4
7	delta_V_gf36_4 += -0.99*V_gf36_4
7	delta_V_gf37_4 += 0.99*V_gf36_4
7	delta_W_gr36_4 += -W_gr36_4
7	delta_W_gr37_4 += W_gr36_4
8	delta_V_artery_4 += -V_gb_in - V_spleenb
8	delta_V_gb_ma_4 += -V_gb_ma_4 + V_gb_in
8	delta_y[2174:2206] += -y[2174:2206] + V_gb_ma_4*(L_dji/L_gtotal)
8	delta_V_gb33_4 += -V_gb33_4 + V_gb_ma_4*(L_asc/L_gtotal)
8	delta_V_gb34_4 += -V_gb34_4 + V_gb_ma_4*(L_tsc/L_gtotal)
8	delta_V_gb35_4 += -V_gb35_4 + V_gb_ma_4*(L_tsc/L_gtotal)
8	delta_V_gb36_4 += -V_gb36_4 + V_gb_ma_4*(L_dsc/L_gtotal)
8	delta_V_gb37_4 += -V_gb37_4 + V_gb_ma_4*(L_rec/L_gtotal)
8	delta_V_pv_4 += np.sum(y[2174:2210]) + V_spleenb
8	delta_V_vein_4 += V_gb37_4
9	delta_V_artery_4 += -V_rb_in
9	delta_V_rb_glm_4 += -V_rb_glm_4 + V_rb_in
9	delta_V_ru0_4 += V_gfr
9	delta_V_rb1_4 += -V_rb1_4 + (V_rb_glm_4 - V_gfr)
9	delta_V_rb2_4 += -V_rb2_4 + V_rb1_4
9	delta_V_rb3_4 += -V_rb3_4 + V_rb2_4
9	delta_V_rb4_4 += -V_rb4_4 + V_rb3_4
9	delta_V_rb5_4 += -V_rb5_4 + V_rb4_4
9	delta_V_vein_4 += V_rb5_4
10	delta_V_ru0_4 += -V_ru0_4
10	delta_y[2132:2171] += -y[2132:2171] + y[2131:2170]
10	delta_V_ubd_4 += V_ru39_4
11	print("clock=", t/60+8, " breakfast")
11	t_meal_4 = t
11	delta_W_gr1_4 += W_meal
11	delta_V_gf1_4 += V_meal
12	print("clock=", t/60+8, " lunch")
12	t_meal_4 = t
12	delta_W_gr1_4 += W_meal
12	delta_V_gf1_4 += V_meal
13	print("clock=", t/60+8, " dinner")
13	t_meal_4 = t
13	delta_W_gr1_4 += W_meal
13	delta_V_gf1_4 += V_meal
14	print("clock=", t/60+8, " drink1")
14	delta_V_gf1_4 += V_drink
15	print("clock=", t/60+8, " drink2")
15	delta_V_gf1_4 += V_drink
16	print("clock=", t/60+8, " drink3")
16	delta_V_gf1_4 += V_drink
17	print("clock=", t/60+8, " urination1")
17	delta_V_ubd_4 += -(V_ubd_4 - V_ubd_rem) if V_ubd_4 > V_ubd_threshold else 0
17	delta_V_urinated_4 += V_ubd_4 - V_ubd_rem if V_ubd_4 > V_ubd_threshold else 0
18	print("clock=", t/60+8, " urination2")
18	delta_V_ubd_4 += -(V_ubd_4 - V_ubd_rem) if V_ubd_4 > V_ubd_threshold else 0
18	delta_V_urinated_4 += V_ubd_4 - V_ubd_rem if V_ubd_4 > V_ubd_threshold else 0
19	print("clock=", t/60+8, " urination3")
19	delta_V_ubd_4 += -(V_ubd_4 - V_ubd_rem) if V_ubd_4 > V_ubd_threshold else 0
19	delta_V_urinated_4 += V_ubd_4 - V_ubd_rem if V_ubd_4 > V_ubd_threshold else 0
20	print("clock=", t/60+8, " urination4")
20	delta_V_ubd_4 += -(V_ubd_4 - V_ubd_rem) if V_ubd_4 > V_ubd_threshold else 0
20	delta_V_urinated_4 += V_ubd_4 - V_ubd_rem if V_ubd_4 > V_ubd_threshold else 0
21	print("clock=", t/60+8, " urination5")
21	delta_V_ubd_4 += -(V_ubd_4 - V_ubd_rem) if V_ubd_4 > V_ubd_threshold else 0
21	delta_V_urinated_4 += V_ubd_4 - V_ubd_rem if V_ubd_4 > V_ubd_threshold else 0
22	print("clock=", t/60+8, " defecation")
22	delta_V_gf37_4 += -0.99*V_gf37_4
22	delta_V_gf_def_4 += 0.99*V_gf37_4
22	delta_W_gr37_4 += -W_gr37_4
22	delta_W_gr_def_4 += W_gr37_4
0	delta_X_vein_4 += -V_cb_in/V_vein_4*X_vein_4 + (V_other_4 - V_other_base)*X_other_4/V_other_4/Kp_msz
0	delta_X_rheart_4 += -X_rheart_4 + V_cb_in/V_vein_4*X_vein_4
0	delta_X_pb1_4 += -X_pb1_4 + X_rheart_4
0	delta_X_pb2_4 += -X_pb2_4 + X_pb1_4
0	delta_X_pb3_4 += -X_pb3_4 + X_pb2_4
0	delta_X_pb4_4 += -X_pb4_4 + X_pb3_4
0	delta_X_lheart_4 += -X_lheart_4 + X_pb4_4
0	delta_X_artery_4 += -V_other_in/V_artery_4*X_artery_4 + X_lheart_4
0	delta_X_other_4 += -(V_other_4 - V_other_base)*X_other_4/V_other_4/Kp_msz + V_other_in/V_artery_4*X_artery_4
1	delta_X_artery_4 += -V_hb_in/V_artery_4*X_artery_4
1	delta_X_pv_4 += -V_pv_out/V_pv_4*X_pv_4
1	delta_X_hb_inlet_4 += -X_hb_inlet_4 + V_pv_out/V_pv_4*X_pv_4 + V_hb_in/V_artery_4*X_artery_4
1	delta_X_fhb1_4 += -V_fhb1_4*(1 - fd_hb)/(V_fhb1_4+V_hi/5)*X_fhb1_4 + X_hb_inlet_4
1	delta_X_fhb2_4 += -V_fhb2_4*(1 - fd_hb)/(V_fhb2_4+V_hi/5)*X_fhb2_4 + V_fhb1_4*(1 - 2*fd_hb)/(V_fhb1_4+V_hi/5)*X_fhb1_4
1	delta_X_fhb3_4 += -V_fhb3_4*(1 - fd_hb)/(V_fhb3_4+V_hi/5)*X_fhb3_4 + V_fhb2_4*(1 - 2*fd_hb)/(V_fhb2_4+V_hi/5)*X_fhb2_4 + V_fhb1_4*fd_hb/(V_fhb1_4+V_hi/5)*X_fhb1_4
1	delta_X_fhb4_4 += -V_fhb4_4*(1 - fd_hb)/(V_fhb4_4+V_hi/5)*X_fhb4_4 + V_fhb3_4*(1 - 2*fd_hb)/(V_fhb3_4+V_hi/5)*X_fhb3_4 + V_fhb2_4*fd_hb/(V_fhb2_4+V_hi/5)*X_fhb2_4
1	delta_X_fhb5_4 += -V_fhb5_4*(1 - fd_hb)/(V_fhb5_4+V_hi/5)*X_fhb5_4 + V_fhb4_4*(1 - 2*fd_hb)/(V_fhb4_4+V_hi/5)*X_fhb4_4 + V_fhb3_4*fd_hb/(V_fhb3_4+V_hi/5)*X_fhb3_4
1	delta_X_hb_outlet_4 += -X_hb_outlet_4 + V_fhb5_4*(1 - fd_hb)/(V_fhb5_4+V_hi/5)*X_fhb5_4 + V_fhb4_4*fd_hb/(V_fhb4_4+V_hi/5)*X_fhb4_4
1	delta_X_vein_4 += X_hb_outlet_4
2	delta_X_hduct_4 += -X_hduct_4
2	delta_X_gbd_4 += -V_gbd_empty_4/V_gbd_4*X_gbd_4 + V_gbd_refill_4/V_hduct_4*X_hduct_4
2	delta_X_bduct_4 += -X_bduct_4 + (V_hduct_4 - V_gbd_refill_4)/V_hduct_4*X_hduct_4 + V_gbd_empty_4/V_gbd_4*X_gbd_4
2	delta_X_gf2_4 += X_bduct_4
3	delta_X_gf1_4 += -min(V_ge_max, ff_stm*V_gf1_4)/V_gf1_4*X_gf1_4
3	delta_X_gf2_4 += min(V_ge_max, ff_stm*V_gf1_4)/V_gf1_4*X_gf1_4
4	delta_X_gf2_4 += -(1-fd_gt)*X_gf2_4
4	delta_X_gf3_4 += -(1-fd_gt)*X_gf3_4 + (1-2*fd_gt)*X_gf2_4
4	delta_y[2400:2429] += -(1-fd_gt)*y[2400:2429] + (1-2*fd_gt)*y[2399:2428] + fd_gt*y[2398:2427]
4	delta_X_gf33_4 += (1-fd_gt)*X_gf32_4 + fd_gt*X_gf31_4
5	delta_X_gf33_4 += -X_gf33_4
5	delta_X_gf34_4 += X_gf33_4
6	delta_X_gf34_4 += -X_gf34_4
6	delta_X_gf35_4 += -X_gf35_4 + X_gf34_4
6	delta_X_gf36_4 += X_gf35_4
7	delta_X_gf36_4 += -0.99*X_gf36_4
7	delta_X_gf37_4 += 0.99*X_gf36_4
8	delta_X_artery_4 += -V_gb_in/V_artery_4*X_artery_4 - V_spleenb/V_artery_4*X_artery_4
8	delta_X_gb_ma_4 += -X_gb_ma_4 + V_gb_in/V_artery_4*X_artery_4
8	delta_y[2360:2392] += -y[2360:2392] + X_gb_ma_4*(L_dji/L_gtotal)
8	delta_X_gb33_4 += -X_gb33_4 + X_gb_ma_4*(L_asc/L_gtotal)
8	delta_X_gb34_4 += -X_gb34_4 + X_gb_ma_4*(L_tsc/L_gtotal)
8	delta_X_gb35_4 += -X_gb35_4 + X_gb_ma_4*(L_tsc/L_gtotal)
8	delta_X_gb36_4 += -X_gb36_4 + X_gb_ma_4*(L_dsc/L_gtotal)
8	delta_X_gb37_4 += -X_gb37_4 + X_gb_ma_4*(L_rec/L_gtotal)
8	delta_X_pv_4 += np.sum(y[2360:2396]) + V_spleenb/V_artery_4*X_artery_4
8	delta_X_vein_4 += X_gb37_4
9	delta_X_artery_4 += -V_rb_in/V_artery_4*X_artery_4
9	delta_X_rb_glm_4 += -X_rb_glm_4 + V_rb_in/V_artery_4*X_artery_4
9	delta_X_ru0_4 += V_gfr/V_rb_glm_4*fu_b_msz*X_rb_glm_4
9	delta_X_rb1_4 += -X_rb1_4 + (V_rb_glm_4 - fu_b_msz*V_gfr)/V_rb_glm_4*X_rb_glm_4
9	delta_X_rb2_4 += -X_rb2_4 + X_rb1_4
9	delta_X_rb3_4 += -X_rb3_4 + X_rb2_4
9	delta_X_rb4_4 += -X_rb4_4 + X_rb3_4
9	delta_X_rb5_4 += -X_rb5_4 + X_rb4_4
9	delta_X_vein_4 += X_rb5_4
10	delta_X_ru0_4 += -X_ru0_4
10	delta_y[2318:2357] += -y[2318:2357] + y[2317:2356]
10	delta_X_ubd_4 += X_ru39_4
17	delta_X_ubd_4 += -(V_ubd_4 - V_ubd_rem)/V_ubd_4*X_ubd_4 if V_ubd_4 > V_ubd_threshold else 0
17	delta_X_urinated_4 += (V_ubd_4 - V_ubd_rem)/V_ubd_4*X_ubd_4 if V_ubd_4 > V_ubd_threshold else 0
18	delta_X_ubd_4 += -(V_ubd_4 - V_ubd_rem)/V_ubd_4*X_ubd_4 if V_ubd_4 > V_ubd_threshold else 0
18	delta_X_urinated_4 += (V_ubd_4 - V_ubd_rem)/V_ubd_4*X_ubd_4 if V_ubd_4 > V_ubd_threshold else 0
19	delta_X_ubd_4 += -(V_ubd_4 - V_ubd_rem)/V_ubd_4*X_ubd_4 if V_ubd_4 > V_ubd_threshold else 0
19	delta_X_urinated_4 += (V_ubd_4 - V_ubd_rem)/V_ubd_4*X_ubd_4 if V_ubd_4 > V_ubd_threshold else 0
20	delta_X_ubd_4 += -(V_ubd_4 - V_ubd_rem)/V_ubd_4*X_ubd_4 if V_ubd_4 > V_ubd_threshold else 0
20	delta_X_urinated_4 += (V_ubd_4 - V_ubd_rem)/V_ubd_4*X_ubd_4 if V_ubd_4 > V_ubd_threshold else 0
21	delta_X_ubd_4 += -(V_ubd_4 - V_ubd_rem)/V_ubd_4*X_ubd_4 if V_ubd_4 > V_ubd_threshold else 0
21	delta_X_urinated_4 += (V_ubd_4 - V_ubd_rem)/V_ubd_4*X_ubd_4 if V_ubd_4 > V_ubd_threshold else 0
22	delta_X_gf37_4 += -0.99*X_gf37_4
22	delta_X_gf_def_4 += 0.99*X_gf37_4
3	delta_X_gp1_4 += -min(V_ge_max, ff_stm*V_gf1_4)/V_gf1_4*X_gp1_4
3	delta_X_gp2_4 += min(V_ge_max, ff_stm*V_gf1_4)/V_gf1_4*X_gp1_4
4	delta_X_gp2_4 += -(1-fd_gt)*X_gp2_4
4	delta_X_gp3_4 += -(1-fd_gt)*X_gp3_4 + (1-2*fd_gt)*X_gp2_4
4	delta_y[2485:2514] += -(1-fd_gt)*y[2485:2514] + (1-2*fd_gt)*y[2484:2513] + fd_gt*y[2483:2512]
4	delta_X_gp33_4 += (1-fd_gt)*X_gp32_4 + fd_gt*X_gp31_4
5	delta_X_gp33_4 += -X_gp33_4
5	delta_X_gp34_4 += X_gp33_4
6	delta_X_gp34_4 += -X_gp34_4
6	delta_X_gp35_4 += -X_gp35_4 + X_gp34_4
6	delta_X_gp36_4 += X_gp35_4
7	delta_X_gp36_4 += -0.99*X_gp36_4
7	delta_X_gp37_4 += 0.99*X_gp36_4
22	delta_X_gp37_4 += -0.99*X_gp37_4
22	delta_X_gp_def_4 += 0.99*X_gp37_4
3	delta_X_gs1_4 += -X_gs1_4 if min(V_ge_max, ff_stm*V_gf1_4)/V_gf1_4 > 0.08 else 0
3	delta_X_gs2_4 += X_gs1_4 if min(V_ge_max, ff_stm*V_gf1_4)/V_gf1_4 > 0.08 else 0
4	delta_X_gs2_4 += -X_gs2_4
4	delta_X_gs3_4 += -X_gs3_4 + X_gs2_4
4	delta_y[2523:2552] += -y[2523:2552] + y[2522:2551]
4	delta_X_gs33_4 += X_gs32_4
5	delta_X_gs33_4 += -X_gs33_4
5	delta_X_gs34_4 += X_gs33_4
6	delta_X_gs34_4 += -X_gs34_4
6	delta_X_gs35_4 += -X_gs35_4 + X_gs34_4
6	delta_X_gs36_4 += X_gs35_4
7	delta_X_gs36_4 += -X_gs36_4
7	delta_X_gs37_4 += X_gs36_4
22	delta_X_gs37_4 += -X_gs37_4
22	delta_X_gs_def_4 += X_gs37_4
6	delta_X_gx34_4 += -X_gx34_4
6	delta_X_gx35_4 += -X_gx35_4 + X_gx34_4
6	delta_X_gx36_4 += X_gx35_4
7	delta_X_gx36_4 += -X_gx36_4
7	delta_X_gx37_4 += X_gx36_4
22	delta_X_gx37_4 += -X_gx37_4
22	delta_X_gx_def_4 += X_gx37_4
0	delta_X_vein_4m += -V_cb_in/V_vein_4*X_vein_4m + (V_other_4 - V_other_base)*X_other_4m/V_other_4/Kp_met
0	delta_X_rheart_4m += -X_rheart_4m + V_cb_in/V_vein_4*X_vein_4m
0	delta_X_pb1_4m += -X_pb1_4m + X_rheart_4m
0	delta_X_pb2_4m += -X_pb2_4m + X_pb1_4m
0	delta_X_pb3_4m += -X_pb3_4m + X_pb2_4m
0	delta_X_pb4_4m += -X_pb4_4m + X_pb3_4m
0	delta_X_lheart_4m += -X_lheart_4m + X_pb4_4m
0	delta_X_artery_4m += -V_other_in/V_artery_4*X_artery_4m + X_lheart_4m
0	delta_X_other_4m += -(V_other_4 - V_other_base)*X_other_4m/V_other_4/Kp_met + V_other_in/V_artery_4*X_artery_4m
1	delta_X_artery_4m += -V_hb_in/V_artery_4*X_artery_4m
1	delta_X_pv_4m += -V_pv_out/V_pv_4*X_pv_4m
1	delta_X_hb_inlet_4m += -X_hb_inlet_4m + V_pv_out/V_pv_4*X_pv_4m + V_hb_in/V_artery_4*X_artery_4m
1	delta_X_fhb1_4m += -V_fhb1_4*(1 - fd_hb)/(V_fhb1_4+V_hi/5)*X_fhb1_4m + X_hb_inlet_4m
1	delta_X_fhb2_4m += -V_fhb2_4*(1 - fd_hb)/(V_fhb2_4+V_hi/5)*X_fhb2_4m + V_fhb1_4*(1 - 2*fd_hb)/(V_fhb1_4+V_hi/5)*X_fhb1_4m
1	delta_X_fhb3_4m += -V_fhb3_4*(1 - fd_hb)/(V_fhb3_4+V_hi/5)*X_fhb3_4m + V_fhb2_4*(1 - 2*fd_hb)/(V_fhb2_4+V_hi/5)*X_fhb2_4m + V_fhb1_4*fd_hb/(V_fhb1_4+V_hi/5)*X_fhb1_4m
1	delta_X_fhb4_4m += -V_fhb4_4*(1 - fd_hb)/(V_fhb4_4+V_hi/5)*X_fhb4_4m + V_fhb3_4*(1 - 2*fd_hb)/(V_fhb3_4+V_hi/5)*X_fhb3_4m + V_fhb2_4*fd_hb/(V_fhb2_4+V_hi/5)*X_fhb2_4m
1	delta_X_fhb5_4m += -V_fhb5_4*(1 - fd_hb)/(V_fhb5_4+V_hi/5)*X_fhb5_4m + V_fhb4_4*(1 - 2*fd_hb)/(V_fhb4_4+V_hi/5)*X_fhb4_4m + V_fhb3_4*fd_hb/(V_fhb3_4+V_hi/5)*X_fhb3_4m
1	delta_X_hb_outlet_4m += -X_hb_outlet_4m + V_fhb5_4*(1 - fd_hb)/(V_fhb5_4+V_hi/5)*X_fhb5_4m + V_fhb4_4*fd_hb/(V_fhb4_4+V_hi/5)*X_fhb4_4m
1	delta_X_vein_4m += X_hb_outlet_4m
2	delta_X_hduct_4m += -X_hduct_4m
2	delta_X_gbd_4m += -V_gbd_empty_4/V_gbd_4*X_gbd_4m + V_gbd_refill_4/V_hduct_4*X_hduct_4m
2	delta_X_bduct_4m += -X_bduct_4m + (V_hduct_4 - V_gbd_refill_4)/V_hduct_4*X_hduct_4m + V_gbd_empty_4/V_gbd_4*X_gbd_4m
2	delta_X_gf2_4m += X_bduct_4m
3	delta_X_gf1_4m += -min(V_ge_max, ff_stm*V_gf1_4)/V_gf1_4*X_gf1_4m
3	delta_X_gf2_4m += min(V_ge_max, ff_stm*V_gf1_4)/V_gf1_4*X_gf1_4m
4	delta_X_gf2_4m += -(1-fd_gt)*X_gf2_4m
4	delta_X_gf3_4m += -(1-fd_gt)*X_gf3_4m + (1-2*fd_gt)*X_gf2_4m
4	delta_y[2671:2700] += -(1-fd_gt)*y[2671:2700] + (1-2*fd_gt)*y[2670:2699] + fd_gt*y[2669:2698]
4	delta_X_gf33_4m += (1-fd_gt)*X_gf32_4m + fd_gt*X_gf31_4m
5	delta_X_gf33_4m += -X_gf33_4m
5	delta_X_gf34_4m += X_gf33_4m
6	delta_X_gf34_4m += -X_gf34_4m
6	delta_X_gf35_4m += -X_gf35_4m + X_gf34_4m
6	delta_X_gf36_4m += X_gf35_4m
7	delta_X_gf36_4m += -0.99*X_gf36_4m
7	delta_X_gf37_4m += 0.99*X_gf36_4m
8	delta_X_artery_4m += -V_gb_in/V_artery_4*X_artery_4m - V_spleenb/V_artery_4*X_artery_4m
8	delta_X_gb_ma_4m += -X_gb_ma_4m + V_gb_in/V_artery_4*X_artery_4m
8	delta_y[2631:2663] += -y[2631:2663] + X_gb_ma_4m*(L_dji/L_gtotal)
8	delta_X_gb33_4m += -X_gb33_4m + X_gb_ma_4m*(L_asc/L_gtotal)
8	delta_X_gb34_4m += -X_gb34_4m + X_gb_ma_4m*(L_tsc/L_gtotal)
8	delta_X_gb35_4m += -X_gb35_4m + X_gb_ma_4m*(L_tsc/L_gtotal)
8	delta_X_gb36_4m += -X_gb36_4m + X_gb_ma_4m*(L_dsc/L_gtotal)
8	delta_X_gb37_4m += -X_gb37_4m + X_gb_ma_4m*(L_rec/L_gtotal)
8	delta_X_pv_4m += np.sum(y[2631:2667]) + V_spleenb/V_artery_4*X_artery_4m
8	delta_X_vein_4m += X_gb37_4m
9	delta_X_artery_4m += -V_rb_in/V_artery_4*X_artery_4m
9	delta_X_rb_glm_4m += -X_rb_glm_4m + V_rb_in/V_artery_4*X_artery_4m
9	delta_X_ru0_4m += V_gfr/V_rb_glm_4*fu_b_met*X_rb_glm_4m
9	delta_X_rb1_4m += -X_rb1_4m + (V_rb_glm_4 - fu_b_met*V_gfr)/V_rb_glm_4*X_rb_glm_4m
9	delta_X_rb2_4m += -X_rb2_4m + X_rb1_4m
9	delta_X_rb3_4m += -X_rb3_4m + X_rb2_4m
9	delta_X_rb4_4m += -X_rb4_4m + X_rb3_4m
9	delta_X_rb5_4m += -X_rb5_4m + X_rb4_4m
9	delta_X_vein_4m += X_rb5_4m
10	delta_X_ru0_4m += -X_ru0_4m
10	delta_y[2589:2628] += -y[2589:2628] + y[2588:2627]
10	delta_X_ubd_4m += X_ru39_4m
17	delta_X_ubd_4m += -(V_ubd_4 - V_ubd_rem)/V_ubd_4*X_ubd_4m if V_ubd_4 > V_ubd_threshold else 0
17	delta_X_urinated_4m += (V_ubd_4 - V_ubd_rem)/V_ubd_4*X_ubd_4m if V_ubd_4 > V_ubd_threshold else 0
18	delta_X_ubd_4m += -(V_ubd_4 - V_ubd_rem)/V_ubd_4*X_ubd_4m if V_ubd_4 > V_ubd_threshold else 0
18	delta_X_urinated_4m += (V_ubd_4 - V_ubd_rem)/V_ubd_4*X_ubd_4m if V_ubd_4 > V_ubd_threshold else 0
19	delta_X_ubd_4m += -(V_ubd_4 - V_ubd_rem)/V_ubd_4*X_ubd_4m if V_ubd_4 > V_ubd_threshold else 0
19	delta_X_urinated_4m += (V_ubd_4 - V_ubd_rem)/V_ubd_4*X_ubd_4m if V_ubd_4 > V_ubd_threshold else 0
20	delta_X_ubd_4m += -(V_ubd_4 - V_ubd_rem)/V_ubd_4*X_ubd_4m if V_ubd_4 > V_ubd_threshold else 0
20	delta_X_urinated_4m += (V_ubd_4 - V_ubd_rem)/V_ubd_4*X_ubd_4m if V_ubd_4 > V_ubd_threshold else 0
21	delta_X_ubd_4m += -(V_ubd_4 - V_ubd_rem)/V_ubd_4*X_ubd_4m if V_ubd_4 > V_ubd_threshold else 0
21	delta_X_urinated_4m += (V_ubd_4 - V_ubd_rem)/V_ubd_4*X_ubd_4m if V_ubd_4 > V_ubd_threshold else 0
22	delta_X_gf37_4m += -0.99*X_gf37_4m
22	delta_X_gf_def_4m += 0.99*X_gf37_4m
6	delta_X_gx34_4m += -X_gx34_4m
6	delta_X_gx35_4m += -X_gx35_4m + X_gx34_4m
6	delta_X_gx36_4m += X_gx35_4m
7	delta_X_gx36_4m += -X_gx36_4m
7	delta_X_gx37_4m += X_gx36_4m
22	delta_X_gx37_4m += -X_gx37_4m
22	delta_X_gx_def_4m += X_gx37_4m
28	delta_X_gs1_4 += X_po_lialda
28	delta_V_gf1_4 += V_water_form
28	print("oral administration of lialda: ", X_po_lialda)
29	t_meal_4 = t
29	delta_W_gr1_4 += W_meal/2
29	delta_V_gf1_4 += V_meal/2
29	print("clock=", t/60+8, " snack during formulation study")
30	t_meal_4 = t
30	delta_W_gr1_4 += W_meal
30	delta_V_gf1_4 += V_meal
30	print("clock=", t/60+8, " meal during formulation study")
24	print("clock=", t/60+start_clock, " time=", t)

## Sheet: N
CRE	Sort	Description
PSru_eff_msz = PSrb_inf_msz
Pgb_eff_msz = Pgb_inf_msz
PSru_eff_met = PSrb_inf_met
Pgb_eff_met = Pgb_inf_met
k_disint_capsule = k_disint_max / (1 + math.exp(- alpha_disint*(t - t50_disint)))
k_dissol_n_apriso = k_dissol_max_apriso / (1 + math.exp(- alpha_dissol_apriso*(t - t50_dissol_apriso)))
k_release_n_lialda = max(k_release_max * (1 / (1 + math.exp(- alpha_release_on*(t - t50_release_on))) - 1 / (1 + math.exp(- alpha_release_off*(t - t50_release_off)))), 0) if t > t0_k_release else 0
phase_gbd_1 = 0 if t_meal_1+lag_gbd_emptying < t <= t_meal_1+45 else 1 if t_meal_1+45 < t and V_gbd_1 < V_gbd_max else 2
phase_gbd_2 = 0 if t_meal_2+lag_gbd_emptying < t <= t_meal_2+45 else 1 if t_meal_2+45 < t and V_gbd_2 < V_gbd_max else 2
phase_gbd_3 = 0 if t_meal_3+lag_gbd_emptying < t <= t_meal_3+45 else 1 if t_meal_3+45 < t and V_gbd_3 < V_gbd_max else 2
phase_gbd_4 = 0 if t_meal_4+lag_gbd_emptying < t <= t_meal_4+45 else 1 if t_meal_4+45 < t and V_gbd_4 < V_gbd_max else 2
V_total_1 = np.sum(y[2:149]) - V_gbd_empty_1 - V_gbd_refill_1 + V_insensible_1
X_total_1 = np.sum(y[188:458]) + np.sum(y[663:668])
X_total_1m = np.sum(y[459:653]) + np.sum(y[668:673])
X_total_1all = X_total_1 + X_total_1m
X_sumdef_1 = X_gs_def_1 + X_gp_def_1 + X_gf_def_1 + X_gx_def_1
X_sumdef_1m = X_gf_def_1m + X_gx_def_1m
X_sumuri_1 = X_ubd_1 + X_urinated_1
X_sumuri_1m = X_ubd_1m + X_urinated_1m
fe_u_1 = X_urinated_1 / X_total_1all if X_total_1all > 0 else fe_u_1
fe_u_1m = X_urinated_1m / X_total_1all if X_total_1all > 0 else fe_u_1m
C_vein_1 = X_vein_1 / V_vein_1
C_vein_1m = X_vein_1m / V_vein_1
AUC_1 += C_vein_1*(t - t_before)
AUC_1m += C_vein_1m*(t - t_before)
V_total_2 = np.sum(y[702:849]) - V_gbd_empty_2 - V_gbd_refill_2 + V_insensible_2
X_total_2 = np.sum(y[888:1158]) + np.sum(y[1363:1368])
X_total_2m = np.sum(y[1159:1353]) + np.sum(y[1368:1373])
X_total_2all = X_total_2 + X_total_2m
X_sumdef_2 = X_gs_def_2 + X_gp_def_2 + X_gf_def_2 + X_gx_def_2
X_sumdef_2m = X_gf_def_2m + X_gx_def_2m
X_sumuri_2 = X_ubd_2 + X_urinated_2
X_sumuri_2m = X_ubd_2m + X_urinated_2m
fe_u_2 = X_urinated_2 / X_total_2all if X_total_2all > 0 else fe_u_2
fe_u_2m = X_urinated_2m / X_total_2all if X_total_2all > 0 else fe_u_2m
C_vein_2 = X_vein_2 / V_vein_2
C_vein_2m = X_vein_2m / V_vein_2
AUC_2 += C_vein_2*(t - t_before)
AUC_2m += C_vein_2m*(t - t_before)
V_total_3 = np.sum(y[1402:1549]) - V_gbd_empty_3 - V_gbd_refill_3 + V_insensible_3
X_total_3 = np.sum(y[1588:1858]) + np.sum(y[2063:2068])
X_total_3m = np.sum(y[1859:2053]) + np.sum(y[2068:2073])
X_total_3all = X_total_3 + X_total_3m
X_sumdef_3 = X_gs_def_3 + X_gp_def_3 + X_gf_def_3 + X_gx_def_3
X_sumdef_3m = X_gf_def_3m + X_gx_def_3m
X_sumuri_3 = X_ubd_3 + X_urinated_3
X_sumuri_3m = X_ubd_3m + X_urinated_3m
fe_u_3 = X_urinated_3 / X_total_3all if X_total_3all > 0 else fe_u_3
fe_u_3m = X_urinated_3m / X_total_3all if X_total_3all > 0 else fe_u_3m
C_vein_3 = X_vein_3 / V_vein_3
C_vein_3m = X_vein_3m / V_vein_3
AUC_3 += C_vein_3*(t - t_before)
AUC_3m += C_vein_3m*(t - t_before)
V_total_4 = np.sum(y[2102:2249]) - V_gbd_empty_4 - V_gbd_refill_4 + V_insensible_4
X_total_4 = np.sum(y[2288:2558]) + np.sum(y[2763:2768])
X_total_4m = np.sum(y[2559:2753]) + np.sum(y[2768:2773])
X_total_4all = X_total_4 + X_total_4m
X_sumdef_4 = X_gs_def_4 + X_gp_def_4 + X_gf_def_4 + X_gx_def_4
X_sumdef_4m = X_gf_def_4m + X_gx_def_4m
X_sumuri_4 = X_ubd_4 + X_urinated_4
X_sumuri_4m = X_ubd_4m + X_urinated_4m
fe_u_4 = X_urinated_4 / X_total_4all if X_total_4all > 0 else fe_u_4
fe_u_4m = X_urinated_4m / X_total_4all if X_total_4all > 0 else fe_u_4m
C_vein_4 = X_vein_4 / V_vein_4
C_vein_4m = X_vein_4m / V_vein_4
AUC_4 += C_vein_4*(t - t_before)
AUC_4m += C_vein_4m*(t - t_before)
t_before = t

## Sheet: D
d	t	y	t_sd	y_sd	y_idx	c_idx	s_idx	Description
d[0]	15	3.00108			654			solution mesalazine
d[1]	30	5.17995			654			solution mesalazine
d[2]	60	1.88888			654			solution mesalazine
d[3]	120	0.432122			654			solution mesalazine
d[4]	180	0.109253			654			solution mesalazine
d[5]	240	0.0421219			654			solution mesalazine
d[6]	15	1.67532			655			solution Ac-5-ASA
d[7]	30	4.01661			655			solution Ac-5-ASA
d[8]	60	4.07225			655			solution Ac-5-ASA
d[9]	120	2.44133			655			solution Ac-5-ASA
d[10]	180	1.26506			655			solution Ac-5-ASA
d[11]	240	0.699128			655			solution Ac-5-ASA
d[12]	360	0.299602			655			solution Ac-5-ASA
d[13]	480	0.177536			655			solution Ac-5-ASA
d[14]	30	0.154831			1354			pentasa mesalazine
d[15]	60	0.67721			1354			pentasa mesalazine
d[16]	120	1.25495			1354			pentasa mesalazine
d[17]	180	2.79988			1354			pentasa mesalazine
d[18]	240	2.57677			1354			pentasa mesalazine
d[19]	360	2.19798			1354			pentasa mesalazine
d[20]	420	2.06423			1354			pentasa mesalazine
d[21]	480	1.00767			1354			pentasa mesalazine
d[22]	600	0.673276			1354			pentasa mesalazine
d[23]	720	0.405427			1354			pentasa mesalazine
d[24]	30	0.266276			1355			pentasa Ac-5-ASA
d[25]	60	1.25382			1355			pentasa Ac-5-ASA
d[26]	120	2.72963			1355			pentasa Ac-5-ASA
d[27]	180	4.52691			1355			pentasa Ac-5-ASA
d[28]	240	4.88209			1355			pentasa Ac-5-ASA
d[29]	360	5.35923			1355			pentasa Ac-5-ASA
d[30]	420	4.69326			1355			pentasa Ac-5-ASA
d[31]	480	3.82778			1355			pentasa Ac-5-ASA
d[32]	600	3.19553			1355			pentasa Ac-5-ASA
d[33]	720	2.45201			1355			pentasa Ac-5-ASA
d[34]	1440	1.08747			1355			pentasa Ac-5-ASA
d[35]	120	0.599092			2054			apriso mesalazine
d[36]	180	2.35478			2054			apriso mesalazine
d[37]	240	3.75528			2054			apriso mesalazine
d[38]	360	4.33246			2054			apriso mesalazine
d[39]	420	3.35402			2054			apriso mesalazine
d[40]	600	0.950904			2054			apriso mesalazine
d[41]	720	0.683392			2054			apriso mesalazine
d[42]	120	0.921118			2055			apriso Ac-5-ASA
d[43]	180	3.13989			2055			apriso Ac-5-ASA
d[44]	240	5.87852			2055			apriso Ac-5-ASA
d[45]	360	8.16586			2055			apriso Ac-5-ASA
d[46]	420	8.4019			2055			apriso Ac-5-ASA
d[47]	480	7.31162			2055			apriso Ac-5-ASA
d[48]	600	4.09417			2055			apriso Ac-5-ASA
d[49]	720	3.23993			2055			apriso Ac-5-ASA
d[50]	1440	1.28698			2055			apriso Ac-5-ASA
d[51]	120	0.0985748			2754			lialda mesalazine
d[52]	180	0.175962			2754			lialda mesalazine
d[53]	240	0.44235			2754			lialda mesalazine
d[54]	360	0.941912			2754			lialda mesalazine
d[55]	420	1.01891			2754			lialda mesalazine
d[56]	480	0.89639			2754			lialda mesalazine
d[57]	600	1.20661			2754			lialda mesalazine
d[58]	720	1.46176			2754			lialda mesalazine
d[59]	1440	0.288924			2754			lialda mesalazine
d[60]	120	0.288475			2755			lialda Ac-5-ASA
d[61]	180	0.233005			2755			lialda Ac-5-ASA
d[62]	240	0.477138			2755			lialda Ac-5-ASA
d[63]	360	1.03183			2755			lialda Ac-5-ASA
d[64]	420	1.15379			2755			lialda Ac-5-ASA
d[65]	480	1.27574			2755			lialda Ac-5-ASA
d[66]	600	2.38569			2755			lialda Ac-5-ASA
d[67]	720	3.23993			2755			lialda Ac-5-ASA
d[68]	1440	1.60901			2755			lialda Ac-5-ASA
d[69]	2880	0.02			2074			apriso unchanged Fe,urine (package insert FDA)
d[70]	2880	0.3			2075			apriso metabolite Fe,urine (package insert FDA)
d[71]	2880	0.13			2775			lialda metabolite Fe,urine (package insert FDA)

## Sheet: M
Date	Memo
